# Supplementary material for: Accelerated lithium-ion diffusion via a ligand ‘hopping’ mechanism in lithium enriched solvate ionic liquids
Source: Royal Society of Chemistry journal article supplement (doi:10.1039/d3cp04666d), 2023-01-01
Supplement: d3cp04666d1.pdf [file d3cp04666d1.pdf]

## Supporting Information

Accelerated lithium-ion diffusion via a ligand ‘hopping’ mechanism in lithium enriched solvate ionic liquids.

*Timothy Harte,<sup>a</sup> Bhagya Dharmasiri,<sup>\*a</sup> Garima S. Dobhal,<sup>a</sup> Tiffany R. Walsh,<sup>\*a</sup> and Luke C. Henderson<sup>\*a</sup>*

<sup>a</sup> Institute for Frontier Materials, Deakin University, Waurn Ponds, Victoria 3216, Australia

\* Email: [luke.henderson@deakin.edu.au](mailto:luke.henderson@deakin.edu.au), [tiffany.walsh@deakin.edu.au](mailto:tiffany.walsh@deakin.edu.au) & [k.dharmasiri@deakin.edu.au](mailto:k.dharmasiri@deakin.edu.au)

**Table S1.** Standard deviation calculated from repeat PFG-NMR measurements. Reported Ln standard deviations are the standard deviation of diffusion measurements converted to Ln.

| Glyme & Nuclei | Ratio                  |                        |                        |                        |                        |
|----------------|------------------------|------------------------|------------------------|------------------------|------------------------|
|                | 1:1                    | 1:1.25                 | 1:1.5                  | 1:1.75                 | 1:2                    |
| G4 Li          | $1.31 \times 10^{-10}$ | $8.90 \times 10^{-11}$ | $7.19 \times 10^{-12}$ | $7.14 \times 10^{-12}$ | $7.35 \times 10^{-13}$ |
| G4 H           | $9.01 \times 10^{-13}$ | $5.26 \times 10^{-13}$ | $6.30 \times 10^{-13}$ | $2.61 \times 10^{-13}$ | $1.58 \times 10^{-13}$ |
| G4 F           | $5.75 \times 10^{-13}$ | $1.78 \times 10^{-13}$ | $8.49 \times 10^{-13}$ | $3.67 \times 10^{-13}$ | $1.90 \times 10^{-13}$ |
| Ln G4 Li       | $3.31 \times 10^{-1}$  | $4.85 \times 10^{-1}$  | $1.83 \times 10^{-1}$  | $3.49 \times 10^{-1}$  | $6.62 \times 10^{-2}$  |
| Ln G4 H        | $1.45 \times 10^{-2}$  | $1.30 \times 10^{-2}$  | $3.25 \times 10^{-2}$  | $2.11 \times 10^{-2}$  | $2.36 \times 10^{-2}$  |
| Ln G4 F        | $8.21 \times 10^{-3}$  | $4.13 \times 10^{-2}$  | $4.28 \times 10^{-2}$  | $2.82 \times 10^{-2}$  | $2.69 \times 10^{-2}$  |
| G3 Li          | $1.83 \times 10^{-11}$ | n.d.                   | $1.69 \times 10^{-13}$ | n.d.                   | $6.65 \times 10^{-14}$ |
| G3 H           | $6.45 \times 10^{-12}$ | n.d.                   | $3.25 \times 10^{-13}$ | n.d.                   | $1.34 \times 10^{-13}$ |
| G3 F           | $6.83 \times 10^{-12}$ | n.d.                   | $2.50 \times 10^{-13}$ | n.d.                   | $1.16 \times 10^{-13}$ |
| Ln G3 Li       | $2.78 \times 10^{-1}$  | n.d.                   | $9.23 \times 10^{-2}$  | n.d.                   | $1.61 \times 10^{-2}$  |
| Ln G3 H        | $1.98 \times 10^{-1}$  | n.d.                   | $2.72 \times 10^{-2}$  | n.d.                   | $3.37 \times 10^{-2}$  |
| Ln G3 F        | $2.43 \times 10^{-1}$  | n.d.                   | $2.78 \times 10^{-2}$  | n.d.                   | $3.88 \times 10^{-2}$  |

**Table S2.** Water content of SIL samples. Samples were dried by the same technique used in the synthesis prior to water content measurement using a Metrohm Karl-Fischer Coulometer 899.

| Sample    | Ratio |        |       |        |       |
|-----------|-------|--------|-------|--------|-------|
|           | 1:1   | 1:1.25 | 1:1.5 | 1:1.75 | 1:2   |
| <b>G3</b> | 0 ppm | n.d.   | 0 ppm | n.d.   | 0 ppm |
| <b>G4</b> | 0 ppm | 0 ppm  | 0 ppm | 0 ppm  | 0 ppm |
|           | 1:2.5 | 1:3    | 1:3.5 | 1:4    |       |
| <b>G3</b> | 0 ppm | 0 ppm  | 0 ppm | 0 ppm  |       |
| <b>G4</b> | 0 ppm | 0 ppm  | n.d.  | n.d.   |       |

**Table S3.** Calculated Li transference numbers ( $t_{Li}$ ) for G4 SIL samples.

| Temperature | Ratio |        |       |        |      |
|-------------|-------|--------|-------|--------|------|
|             | 1:1   | 1:1.25 | 1:1.5 | 1:1.75 | 1:2  |
| 20          | 0.49  | 0.50   | 0.50  | 0.50   | n.d. |
| 30          | 0.49  | 0.50   | 0.49  | 0.50   | 0.55 |
| 40          | 0.50  | 0.50   | 0.49  | 0.50   | 0.49 |
| 50          | 0.53  | 0.52   | 0.50  | 0.50   | 0.49 |
| 55          | 0.56  | 0.53   | 0.50  | 0.50   | 0.49 |
| 60          | 0.60  | 0.56   | 0.52  | 0.51   | 0.52 |
| 65          | 0.64  | 0.59   | 0.53  | 0.51   | 0.54 |
| 70          | 0.69  | 0.62   | 0.55  | 0.52   | 0.55 |
| 75          | 0.75  | 0.65   | 0.57  | 0.52   | 0.59 |
| 80          | 0.80  | 0.72   | 0.60  | 0.53   | 0.63 |
|             | Ratio |        |       |        |      |
| Temperature | 1:2.5 | 1:3    |       |        |      |
| 40          | 0.68  | n.d.   |       |        |      |

|    |      |      |
|----|------|------|
| 50 | 0.55 | 0.75 |
| 60 | 0.51 | 0.62 |
| 70 | 0.52 | 0.59 |
| 80 | 0.58 | 0.66 |

**Table S4.** Calculated Li transference numbers ( $t_{Li}$ ) for G3 SIL samples.

| Temperature | Ratio |       |      |       |      |
|-------------|-------|-------|------|-------|------|
|             | 1:1   | 1:1.5 | 1:2  | 1:2.5 | 1:3  |
| 20          | 0.58  | 0.59  | n.d. | n.d.  | n.d. |
| 30          | 0.57  | 0.59  | n.d. | n.d.  | n.d. |
| 40          | 0.57  | 0.58  | 0.58 | n.d.  | n.d. |
| 50          | 0.60  | 0.58  | 0.56 | 0.57  | n.d. |
| 55          | 0.61  | 0.58  | 0.57 | n.d.  | n.d. |
| 60          | 0.64  | 0.59  | 0.57 | 0.55  | 0.58 |
| 65          | 0.67  | 0.60  | 0.57 | n.d.  | n.d. |
| 70          | 0.71  | 0.61  | 0.60 | 0.55  | 0.56 |
| 75          | 0.75  | 0.63  | 0.57 | n.d.  | n.d. |
| 80          | 0.80  | 0.67  | 0.59 | 0.55  | 0.56 |

  

| Temperature | Ratio |      |
|-------------|-------|------|
|             | 1:3.5 | 1:4  |
| 70          | 0.60  | n.d. |
| 80          | 0.57  | 0.60 |

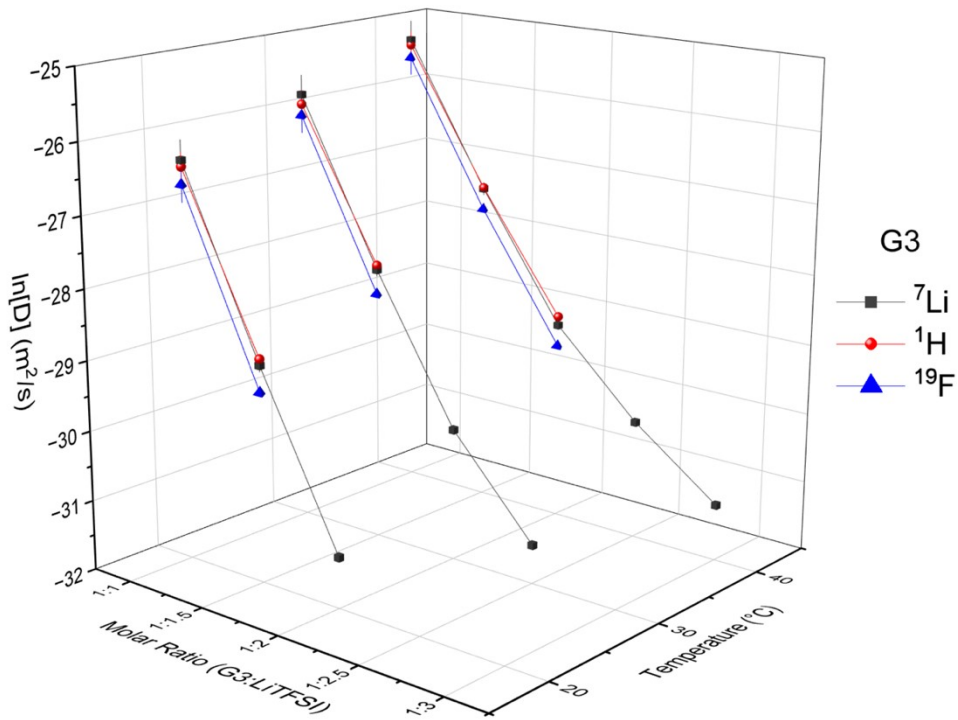

**Fig S1.** 3D plot showing Ln of diffusion coefficients of  $^7\text{Li}$ ,  $^1\text{H}$  and  $^{19}\text{F}$  nuclei present in Li, glyme & TFSI components of SIL samples G3-1:1 through to G3-1:3 across the 20-40  $^{\circ}\text{C}$  temperature range.

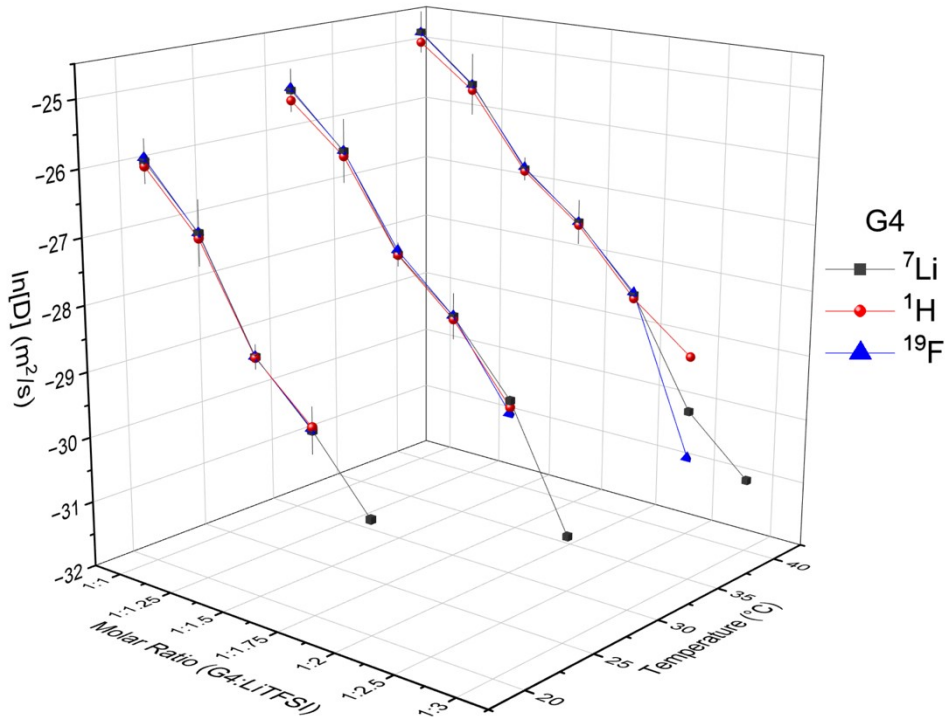

**Fig S2.** 3D plot showing Ln of diffusion coefficients of  $^7\text{Li}$ ,  $^1\text{H}$  and  $^{19}\text{F}$  nuclei present in SIL samples G4-1:1 through to G4-1:3 across the 20-40  $^{\circ}\text{C}$  temperature range.

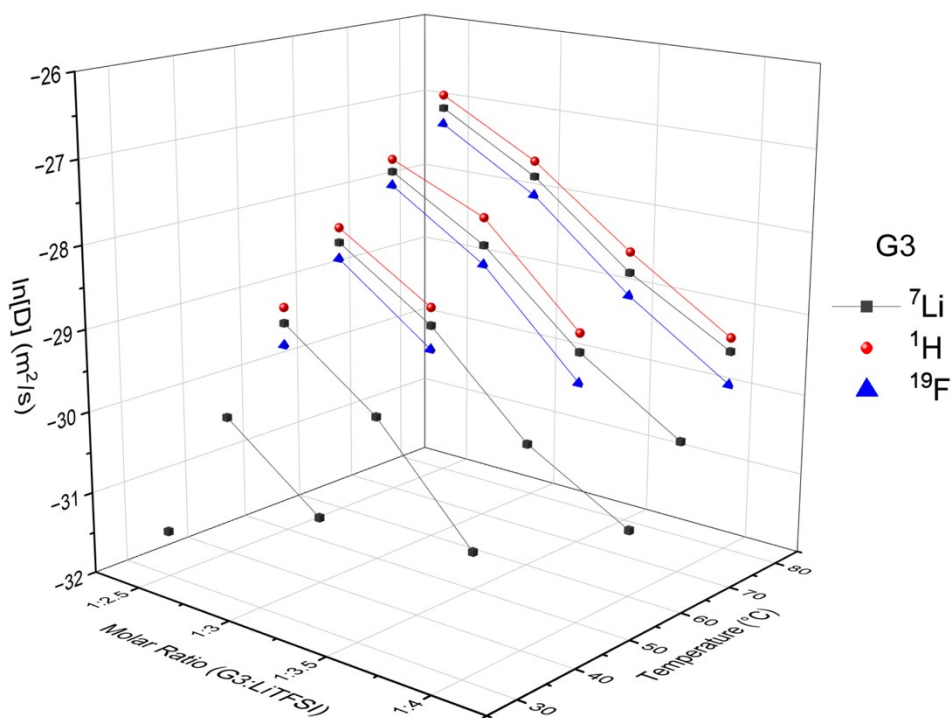

**Fig S3.** 3D plot showing Ln of diffusion coefficients of  $^7\text{Li}$ ,  $^1\text{H}$  and  $^{19}\text{F}$  in higher concentration SIL samples G3-1:2.5 through to G3-1:4 across the 30-80 °C temperature range.

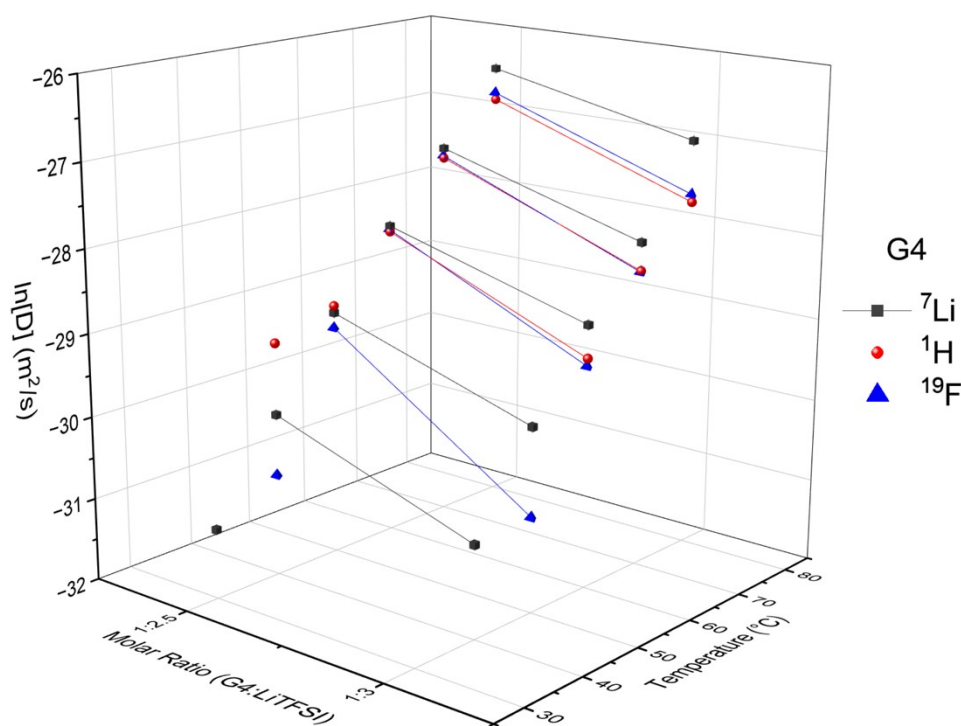

**Fig S4.** 3D plot showing Ln of diffusion coefficients of  $^7\text{Li}$ ,  $^1\text{H}$  and  $^{19}\text{F}$  in higher concentration SIL samples G4-1:2.5 and G4-1:3 across the 30-80 °C temperature range.

Data gaps explanation: gaps in diffusion coefficient data at lower temperatures and in Li higher concentration samples are due to diffusion speeds of nuclei being at or below the limit of accurate measurement on the NMR spectrometer.

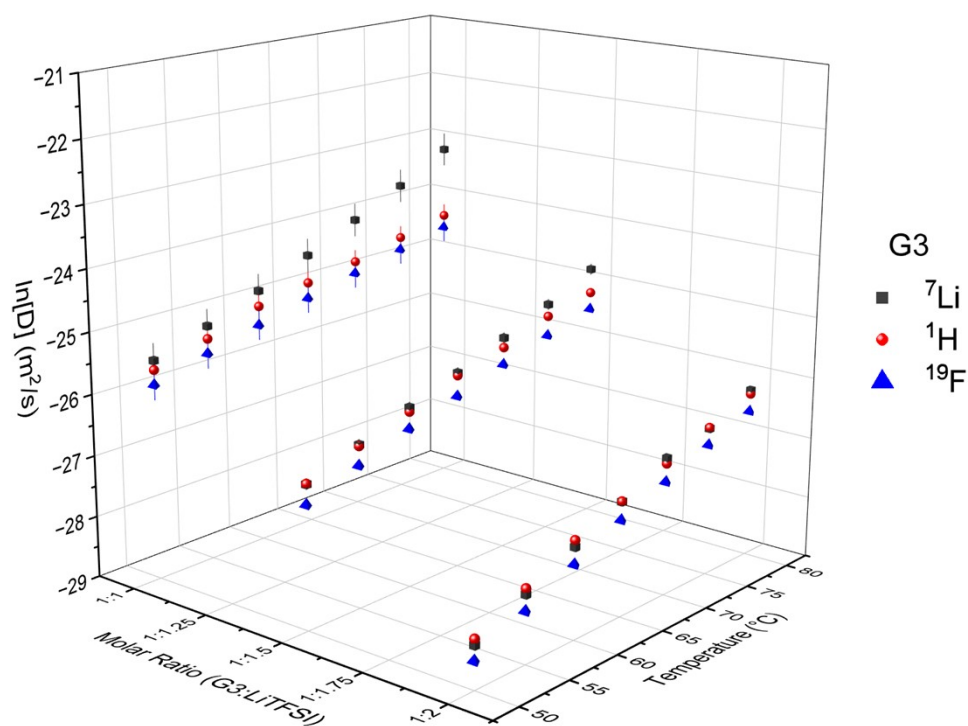

**Fig S5.** Plot without connecting lines, presented to avoid misleading false cusps line connected point graphs. A 3D plot showing  $\ln$  of diffusion coefficients of  $^7\text{Li}$ ,  $^1\text{H}$  and  $^{19}\text{F}$  nuclei present in Li, glyme & TFSI components of SIL samples G3-1:1 through to G3-1:2 across the 50-80  $^{\circ}\text{C}$  temperature range.

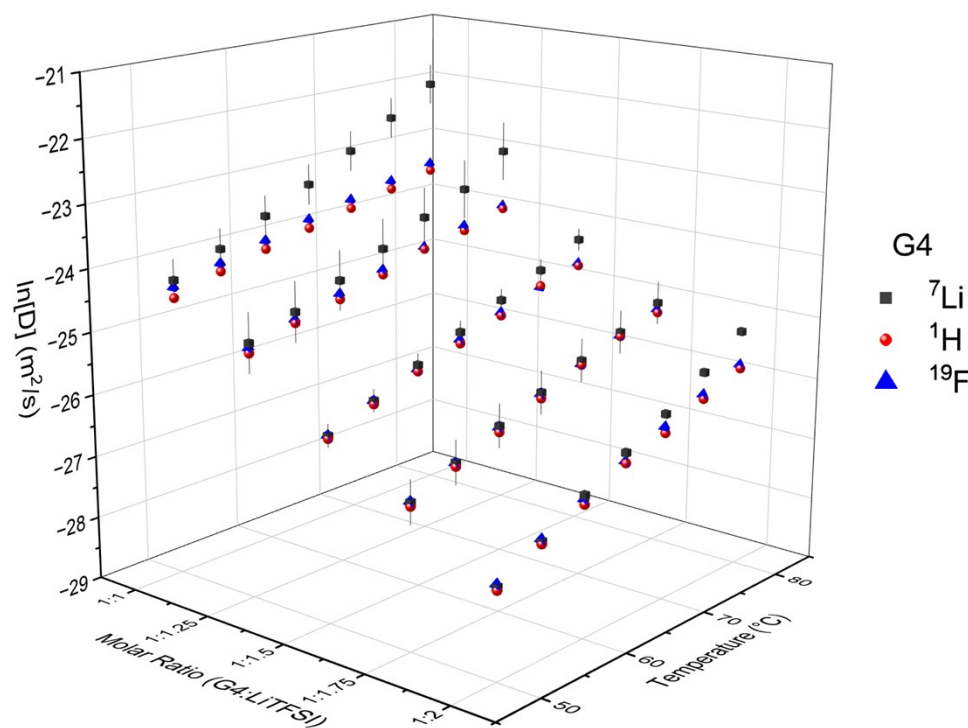

**Fig S6.** Plot without connecting lines, presented to avoid misleading false cusps line connected point graphs. A 3D plot showing 50-80  $^{\circ}\text{C}$  diffusion data for G4-1:1 through to G4-1:2 SIL samples.

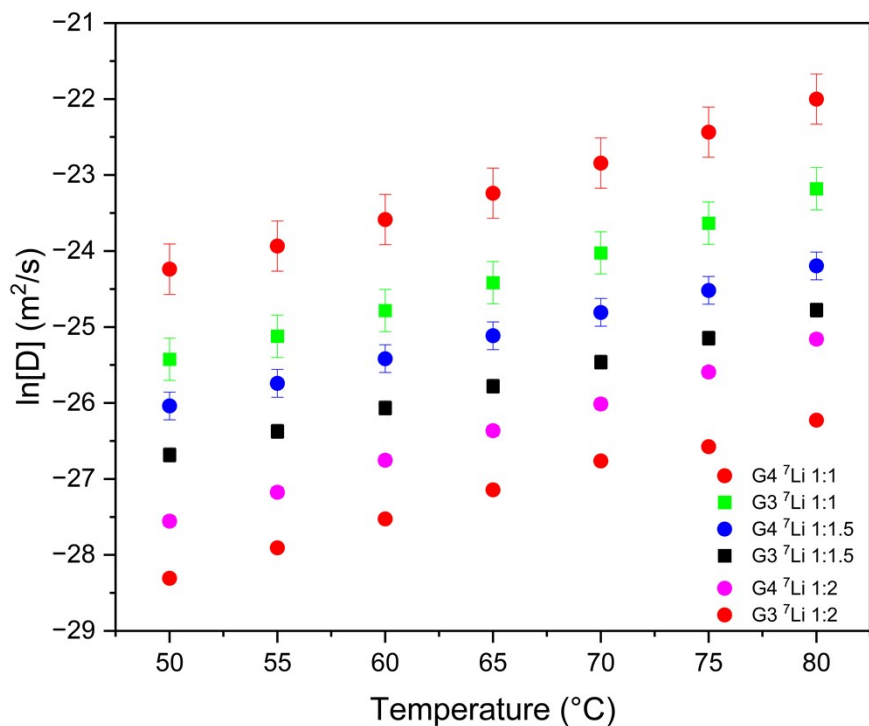

**Fig S7.** Plot without connecting lines, presented to avoid misleading false cusps line connected point graphs. A 2D plot showing Li nuclei 50-80 °C diffusion data for G3 and G4 samples 1:1 through to 1:2.

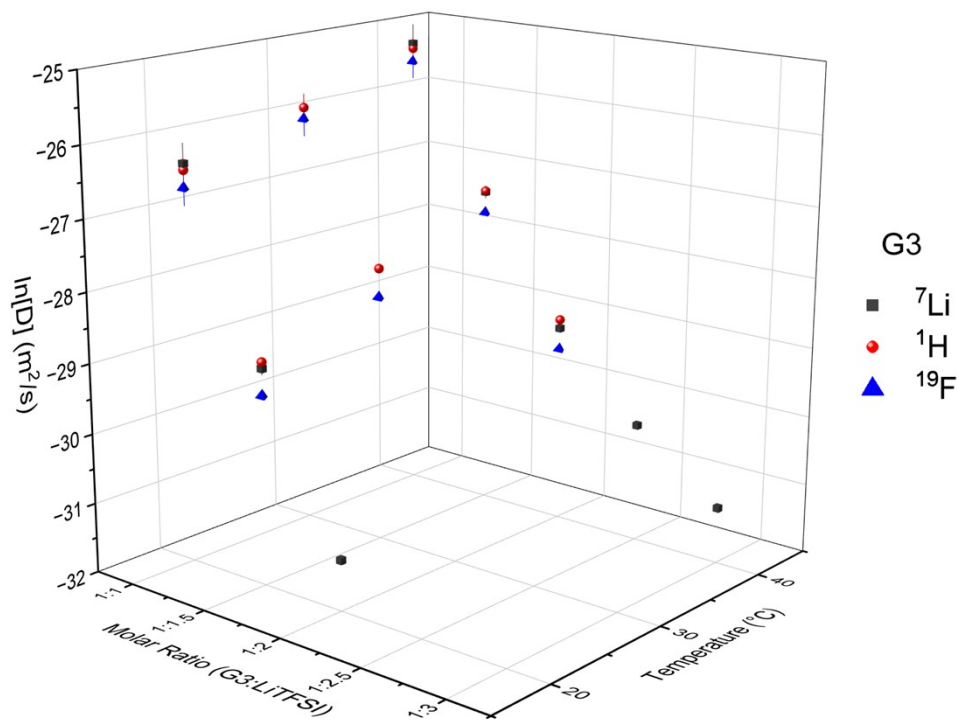

**Fig S8.** Plot without connecting lines, presented to avoid misleading false cusps line connected point graphs. SIL samples G3-1:1 through to G3-1:3 across the 20-40 °C temperature range.

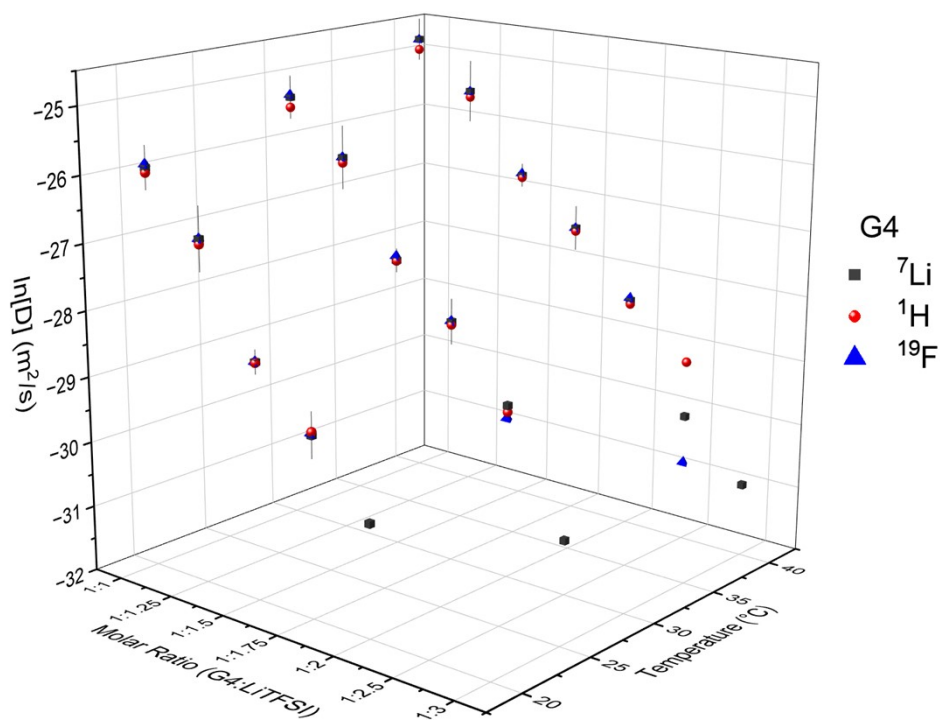

**Fig S9.** Plot without connecting lines, presented to avoid misleading false cusps line connected point graphs. SIL samples G4-1:1 through to G4-1:3 across the 20-40 °C temperature range.



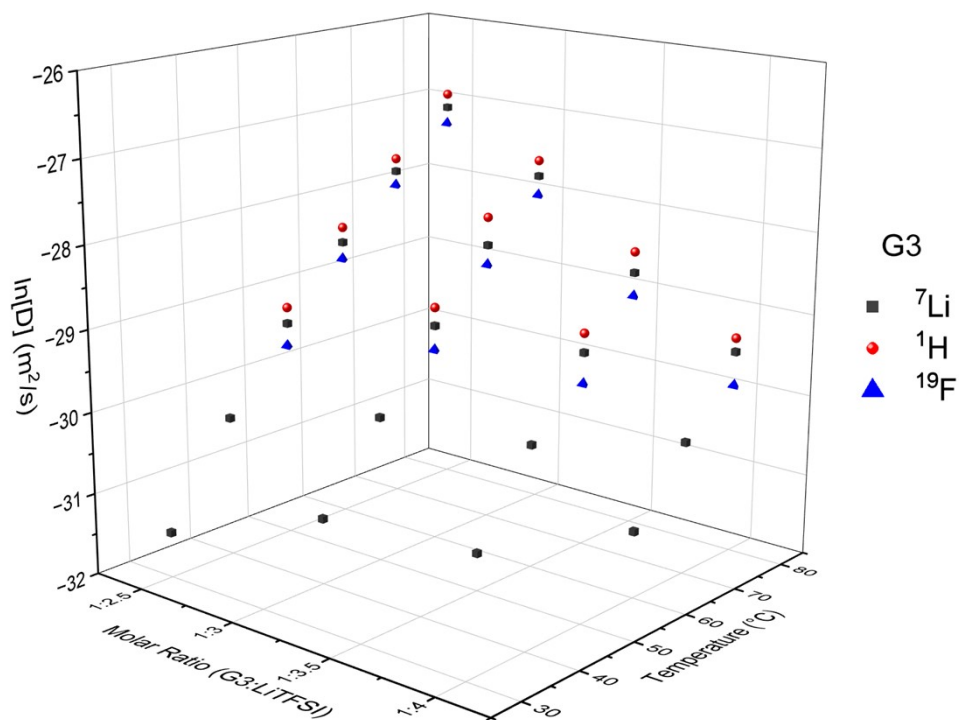

**Fig S10.** Plot without connecting lines, presented to avoid misleading false cusps line connected point graphs. SIL samples G3-1:2.5 through to G3-1:4 across the 30-80 °C temperature range.

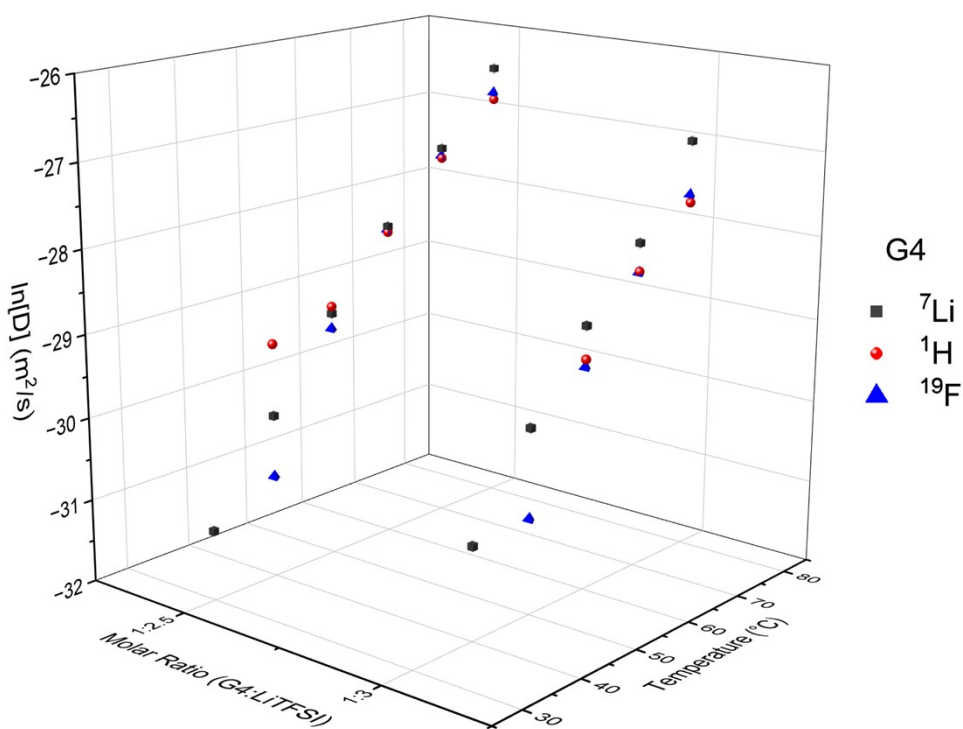

**Fig 11.** Plot without connecting lines, presented to avoid misleading false cusps line connected point graphs. SIL samples G4-1:2.5 and G4-1:3 across the 30-80 °C temperature range.

**Table S5.** Self-diffusion coefficients (m<sup>2</sup>/s) of <sup>7</sup>Li nuclei in G4 samples.

| Temperature | Ratio                     |                           |                           |                           |                           |
|-------------|---------------------------|---------------------------|---------------------------|---------------------------|---------------------------|
|             | 1:1                       | 1:1.25                    | 1:1.5                     | 1:1.75                    | 1:2                       |
| 20          | 5.476 x 10 <sup>-12</sup> | 2.276 x 10 <sup>-12</sup> | 4.581 x 10 <sup>-13</sup> | 1.967 x 10 <sup>-13</sup> | 6.996 x 10 <sup>-14</sup> |
| 30          | 1.012 x 10 <sup>-11</sup> | 4.595 x 10 <sup>-12</sup> | 1.118 x 10 <sup>-12</sup> | 5.280 x 10 <sup>-13</sup> | 1.817 x 10 <sup>-13</sup> |
| 40          | 1.738 x 10 <sup>-11</sup> | 8.436 x 10 <sup>-12</sup> | 2.504 x 10 <sup>-12</sup> | 1.260 x 10 <sup>-12</sup> | 4.749 x 10 <sup>-13</sup> |
| 50          | 2.972 x 10 <sup>-11</sup> | 1.482 x 10 <sup>-11</sup> | 4.912 x 10 <sup>-12</sup> | 2.571 x 10 <sup>-12</sup> | 1.079 x 10 <sup>-12</sup> |
| 55          | 4.027 x 10 <sup>-11</sup> | 1.947 x 10 <sup>-11</sup> | 6.615 x 10 <sup>-12</sup> | 3.586 x 10 <sup>-12</sup> | 1.579 x 10 <sup>-12</sup> |
| 60          | 5.713 x 10 <sup>-11</sup> | 2.620 x 10 <sup>-11</sup> | 9.153 x 10 <sup>-12</sup> | 4.883 x 10 <sup>-12</sup> | 2.405 x 10 <sup>-12</sup> |
| 65          | 8.077 x 10 <sup>-11</sup> | 3.603 x 10 <sup>-11</sup> | 1.238 x 10 <sup>-11</sup> | 6.470 x 10 <sup>-12</sup> | 3.545 x 10 <sup>-12</sup> |
| 70          | 1.200 x 10 <sup>-10</sup> | 5.020 x 10 <sup>-11</sup> | 1.682 x 10 <sup>-11</sup> | 8.513 x 10 <sup>-12</sup> | 5.041 x 10 <sup>-12</sup> |
| 75          | 1.804 x 10 <sup>-10</sup> | 6.735 x 10 <sup>-11</sup> | 2.250 x 10 <sup>-11</sup> | 1.081 x 10 <sup>-11</sup> | 7.683 x 10 <sup>-12</sup> |
| 80          | 2.790 x 10 <sup>-10</sup> | 1.087 x 10 <sup>-10</sup> | 3.103 x 10 <sup>-11</sup> | 1.416 x 10 <sup>-11</sup> | 1.185 x 10 <sup>-11</sup> |
|             | <b>1:2.5</b>              | <b>1:3</b>                |                           |                           |                           |
| 20          | n.d.                      | n.d.                      |                           |                           |                           |
| 30          | 2.943 x 10 <sup>-14</sup> | n.d.                      |                           |                           |                           |
| 40          | 9.141 x 10 <sup>-14</sup> | 3.890 x 10 <sup>-14</sup> |                           |                           |                           |
| 50          | 2.539 x 10 <sup>-13</sup> | 1.172 x 10 <sup>-13</sup> |                           |                           |                           |
| 60          | 6.097 x 10 <sup>-13</sup> | 3.071 x 10 <sup>-13</sup> |                           |                           |                           |
| 70          | 1.358 x 10 <sup>-12</sup> | 6.671 x 10 <sup>-13</sup> |                           |                           |                           |
| 80          | 3.217 x 10 <sup>-12</sup> | 1.893 x 10 <sup>-12</sup> |                           |                           |                           |

**Table S6.** Self-diffusion coefficients (m<sup>2</sup>/s) of <sup>1</sup>H nuclei in G4 samples.

| Temperature | Ratio                     |                           |                           |                           |                           |
|-------------|---------------------------|---------------------------|---------------------------|---------------------------|---------------------------|
|             | 1:1                       | 1:1.25                    | 1:1.5                     | 1:1.75                    | 1:2                       |
| 20          | 5.080 x 10 <sup>-12</sup> | 2.103 x 10 <sup>-12</sup> | 4.531 x 10 <sup>-13</sup> | 2.062 x 10 <sup>-13</sup> | n.d.                      |
| 30          | 8.657 x 10 <sup>-12</sup> | 4.235 x 10 <sup>-12</sup> | 1.109 x 10 <sup>-12</sup> | 5.035 x 10 <sup>-13</sup> | 1.642 x 10 <sup>-13</sup> |
| 40          | 1.471 x 10 <sup>-11</sup> | 7.661 x 10 <sup>-12</sup> | 2.416 x 10 <sup>-12</sup> | 1.198 x 10 <sup>-12</sup> | 4.476 x 10 <sup>-13</sup> |
| 50          | 2.244 x 10 <sup>-11</sup> | 1.266 x 10 <sup>-11</sup> | 4.698 x 10 <sup>-12</sup> | 2.415 x 10 <sup>-12</sup> | 1.026 x 10 <sup>-12</sup> |
| 55          | 2.810 x 10 <sup>-11</sup> | 1.634 x 10 <sup>-11</sup> | 6.259 x 10 <sup>-12</sup> | 3.373 x 10 <sup>-12</sup> | 1.521 x 10 <sup>-12</sup> |
| 60          | 3.336 x 10 <sup>-11</sup> | 1.938 x 10 <sup>-11</sup> | 8.268 x 10 <sup>-12</sup> | 4.437 x 10 <sup>-12</sup> | 2.084 x 10 <sup>-12</sup> |
| 65          | 3.926 x 10 <sup>-11</sup> | 2.366 x 10 <sup>-11</sup> | 1.030 x 10 <sup>-11</sup> | 5.891 x 10 <sup>-12</sup> | 3.009 x 10 <sup>-12</sup> |
| 70          | 4.588 x 10 <sup>-11</sup> | 2.975 x 10 <sup>-11</sup> | 1.307 x 10 <sup>-11</sup> | 7.955 x 10 <sup>-12</sup> | 3.729 x 10 <sup>-12</sup> |
| 75          | 5.383 x 10 <sup>-11</sup> | 3.376 x 10 <sup>-11</sup> | 1.738 x 10 <sup>-11</sup> | 1.012 x 10 <sup>-11</sup> | 5.018 x 10 <sup>-12</sup> |
| 80          | 6.328 x 10 <sup>-11</sup> | 4.112 x 10 <sup>-11</sup> | 2.007 x 10 <sup>-11</sup> | 1.207 x 10 <sup>-11</sup> | 6.509 x 10 <sup>-12</sup> |
|             | <b>1:2.5</b>              | <b>1:3</b>                |                           |                           |                           |
| 20          | n.d.                      | n.d.                      |                           |                           |                           |
| 30          | n.d.                      | n.d.                      |                           |                           |                           |
| 40          | 2.175 x 10 <sup>-13</sup> | n.d.                      |                           |                           |                           |
| 50          | 2.764 x 10 <sup>-13</sup> | n.d.                      |                           |                           |                           |
| 60          | 5.679 x 10 <sup>-13</sup> | 2.061 x 10 <sup>-13</sup> |                           |                           |                           |
| 70          | 1.203 x 10 <sup>-12</sup> | 4.743 x 10 <sup>-13</sup> |                           |                           |                           |

80       $2.177 \times 10^{-12}$      $9.046 \times 10^{-13}$

**Table S7.** Self-diffusion coefficients ( $m^2/s$ ) of  $^{19}F$  nuclei in G4 samples.

| Temperature | Ratio                   |                         |                         |                         |                         |
|-------------|-------------------------|-------------------------|-------------------------|-------------------------|-------------------------|
|             | 1:1                     | 1:1.25                  | 1:1.5                   | 1:1.75                  | 1:2                     |
| 20          | $5.706 \times 10^{-12}$ | $2.255 \times 10^{-12}$ | $4.556 \times 10^{-13}$ | $2.003 \times 10^{-13}$ | n.d.                    |
| 30          | $1.039 \times 10^{-11}$ | $4.567 \times 10^{-12}$ | $1.183 \times 10^{-12}$ | $5.279 \times 10^{-13}$ | $1.490 \times 10^{-13}$ |
| 40          | $1.712 \times 10^{-11}$ | $8.313 \times 10^{-12}$ | $2.556 \times 10^{-12}$ | $1.247 \times 10^{-12}$ | $4.894 \times 10^{-13}$ |
| 50          | $2.642 \times 10^{-11}$ | $1.362 \times 10^{-11}$ | $4.895 \times 10^{-12}$ | $2.576 \times 10^{-12}$ | $1.113 \times 10^{-12}$ |
| 55          | $3.179 \times 10^{-11}$ | $1.713 \times 10^{-11}$ | $6.527 \times 10^{-12}$ | $3.525 \times 10^{-12}$ | $1.622 \times 10^{-12}$ |
| 60          | $3.804 \times 10^{-11}$ | $2.099 \times 10^{-11}$ | $8.464 \times 10^{-12}$ | $4.724 \times 10^{-12}$ | $2.244 \times 10^{-12}$ |
| 65          | $4.500 \times 10^{-11}$ | $2.537 \times 10^{-11}$ | $1.087 \times 10^{-11}$ | $6.256 \times 10^{-12}$ | $3.073 \times 10^{-12}$ |
| 70          | $5.270 \times 10^{-11}$ | $3.055 \times 10^{-11}$ | $1.365 \times 10^{-11}$ | $7.983 \times 10^{-12}$ | $4.086 \times 10^{-12}$ |
| 75          | $6.133 \times 10^{-11}$ | $3.635 \times 10^{-11}$ | $1.689 \times 10^{-11}$ | $1.013 \times 10^{-11}$ | $5.354 \times 10^{-12}$ |
| 80          | $7.081 \times 10^{-11}$ | $4.294 \times 10^{-11}$ | $2.074 \times 10^{-11}$ | $1.260 \times 10^{-11}$ | $6.886 \times 10^{-12}$ |
|             | <b>1:2.5</b>            | <b>1:3</b>              |                         |                         |                         |
| 20          | n.d.                    | n.d.                    |                         |                         |                         |
| 30          | n.d.                    | n.d.                    |                         |                         |                         |
| 40          | $4.343 \times 10^{-14}$ | n.d.                    |                         |                         |                         |
| 50          | $2.103 \times 10^{-13}$ | $4.005 \times 10^{-14}$ |                         |                         |                         |
| 60          | $5.818 \times 10^{-13}$ | $1.877 \times 10^{-13}$ |                         |                         |                         |
| 70          | $1.231 \times 10^{-12}$ | $4.667 \times 10^{-13}$ |                         |                         |                         |
| 80          | $2.360 \times 10^{-12}$ | $9.923 \times 10^{-13}$ |                         |                         |                         |

**Table S8.** Self-diffusion coefficients ( $m^2/s$ ) of  $^7Li$  nuclei in G3 samples.

| Temperature | Ratio                   |                         |                         |                         |
|-------------|-------------------------|-------------------------|-------------------------|-------------------------|
|             | 1:1                     | 1:1.5                   | 1:2                     |                         |
| 20          | $3.663 \times 10^{-12}$ | $2.767 \times 10^{-13}$ | $2.614 \times 10^{-14}$ |                         |
| 30          | $6.460 \times 10^{-12}$ | $6.479 \times 10^{-13}$ | $8.430 \times 10^{-14}$ |                         |
| 40          | $1.064 \times 10^{-11}$ | $1.388 \times 10^{-12}$ | $2.279 \times 10^{-13}$ |                         |
| 50          | $9.078 \times 10^{-12}$ | $2.581 \times 10^{-12}$ | $5.085 \times 10^{-13}$ |                         |
| 55          | $1.229 \times 10^{-11}$ | $3.518 \times 10^{-12}$ | $7.591 \times 10^{-13}$ |                         |
| 60          | $1.725 \times 10^{-11}$ | $4.785 \times 10^{-12}$ | $1.111 \times 10^{-12}$ |                         |
| 65          | $2.491 \times 10^{-11}$ | $6.373 \times 10^{-12}$ | $1.627 \times 10^{-12}$ |                         |
| 70          | $3.680 \times 10^{-11}$ | $8.746 \times 10^{-12}$ | $2.383 \times 10^{-12}$ |                         |
| 75          | $5.445 \times 10^{-11}$ | $1.199 \times 10^{-11}$ | $2.874 \times 10^{-12}$ |                         |
| 80          | $8.571 \times 10^{-11}$ | $1.734 \times 10^{-11}$ | $4.077 \times 10^{-12}$ |                         |
|             | <b>1:2.5</b>            | <b>1:3</b>              | <b>1:3.5</b>            | <b>1:4</b>              |
| 20          | n.d.                    | n.d.                    | n.d.                    | n.d.                    |
| 30          | $2.210 \times 10^{-14}$ | n.d.                    | n.d.                    | n.d.                    |
| 40          | $7.069 \times 10^{-14}$ | $2.851 \times 10^{-14}$ | n.d.                    | n.d.                    |
| 50          | $1.844 \times 10^{-13}$ | $7.653 \times 10^{-14}$ | $2.021 \times 10^{-14}$ | n.d.                    |
| 60          | $4.215 \times 10^{-13}$ | $1.905 \times 10^{-13}$ | $5.863 \times 10^{-14}$ | $2.873 \times 10^{-14}$ |

|    |                         |                         |                         |                         |
|----|-------------------------|-------------------------|-------------------------|-------------------------|
| 70 | $8.803 \times 10^{-13}$ | $4.294 \times 10^{-13}$ | $1.451 \times 10^{-13}$ | $6.512 \times 10^{-14}$ |
| 80 | $1.730 \times 10^{-12}$ | $8.674 \times 10^{-13}$ | $3.207 \times 10^{-13}$ | $1.565 \times 10^{-13}$ |

**Table S9.** Self-diffusion coefficients ( $m^2/s$ ) of  $1H$  nuclei in G3 samples.

| Temperature | Ratio                   |                         |                         |                         |
|-------------|-------------------------|-------------------------|-------------------------|-------------------------|
|             | 1:1                     | 1:1.5                   | 1:2                     |                         |
| 20          | $3.346 \times 10^{-12}$ | $3.021 \times 10^{-13}$ | n.d.                    |                         |
| 30          | $5.635 \times 10^{-12}$ | $6.901 \times 10^{-13}$ | n.d.                    |                         |
| 40          | $9.853 \times 10^{-12}$ | $1.409 \times 10^{-12}$ | $2.585 \times 10^{-13}$ |                         |
| 50          | $7.800 \times 10^{-12}$ | $2.594 \times 10^{-12}$ | $5.571 \times 10^{-13}$ |                         |
| 55          | $9.978 \times 10^{-12}$ | $3.450 \times 10^{-12}$ | $8.284 \times 10^{-13}$ |                         |
| 60          | $1.334 \times 10^{-11}$ | $4.455 \times 10^{-12}$ | $1.233 \times 10^{-12}$ |                         |
| 65          | $1.567 \times 10^{-11}$ | $6.096 \times 10^{-12}$ | $1.631 \times 10^{-12}$ |                         |
| 70          | $1.798 \times 10^{-11}$ | $7.450 \times 10^{-12}$ | $2.180 \times 10^{-12}$ |                         |
| 75          | $2.212 \times 10^{-11}$ | $9.806 \times 10^{-12}$ | $2.907 \times 10^{-12}$ |                         |
| 80          | $2.665 \times 10^{-11}$ | $1.160 \times 10^{-11}$ | $3.836 \times 10^{-12}$ |                         |
|             | 1:2.5                   | 1:3                     | 1:3.5                   | 1:4                     |
| 20          | n.d.                    | n.d.                    | n.d.                    | n.d.                    |
| 30          | n.d.                    | n.d.                    | n.d.                    | n.d.                    |
| 40          | n.d.                    | n.d.                    | n.d.                    | n.d.                    |
| 50          | $2.250 \times 10^{-13}$ | n.d.                    | n.d.                    | n.d.                    |
| 60          | $5.089 \times 10^{-13}$ | $2.393 \times 10^{-13}$ | n.d.                    | n.d.                    |
| 70          | $1.032 \times 10^{-12}$ | $6.094 \times 10^{-13}$ | $1.849 \times 10^{-13}$ | n.d.                    |
| 80          | $2.048 \times 10^{-12}$ | $1.056 \times 10^{-12}$ | $4.172 \times 10^{-13}$ | $1.854 \times 10^{-13}$ |

**Table S10.** Self-diffusion coefficients ( $m^2/s$ ) of  $19F$  nuclei in G3 samples.

| Temperature | Ratio                   |                         |                         |      |
|-------------|-------------------------|-------------------------|-------------------------|------|
|             | 1:1                     | 1:1.5                   | 1:2                     |      |
| 20          | $2.607 \times 10^{-12}$ | $1.886 \times 10^{-13}$ | n.d.                    |      |
| 30          | $4.775 \times 10^{-12}$ | $4.545 \times 10^{-13}$ | n.d.                    |      |
| 40          | $8.094 \times 10^{-12}$ | $1.017 \times 10^{-12}$ | $1.665 \times 10^{-13}$ |      |
| 50          | $6.106 \times 10^{-12}$ | $1.863 \times 10^{-12}$ | $3.985 \times 10^{-13}$ |      |
| 55          | $7.796 \times 10^{-12}$ | $2.524 \times 10^{-12}$ | $5.829 \times 10^{-13}$ |      |
| 60          | $9.714 \times 10^{-12}$ | $3.372 \times 10^{-12}$ | $8.408 \times 10^{-13}$ |      |
| 65          | $1.204 \times 10^{-11}$ | $4.329 \times 10^{-12}$ | $1.207 \times 10^{-12}$ |      |
| 70          | $1.468 \times 10^{-11}$ | $5.596 \times 10^{-12}$ | $1.618 \times 10^{-12}$ |      |
| 75          | $1.784 \times 10^{-11}$ | $7.061 \times 10^{-12}$ | $2.183 \times 10^{-12}$ |      |
| 80          | $2.149 \times 10^{-11}$ | $8.727 \times 10^{-12}$ | $2.861 \times 10^{-12}$ |      |
|             | 1:2.5                   | 1:3                     | 1:3.5                   | 1:4  |
| 20          | n.d.                    | n.d.                    | n.d.                    | n.d. |
| 30          | n.d.                    | n.d.                    | n.d.                    | n.d. |
| 40          | n.d.                    | n.d.                    | n.d.                    | n.d. |

|           |                         |                         |                         |                         |
|-----------|-------------------------|-------------------------|-------------------------|-------------------------|
| <b>50</b> | $1.387 \times 10^{-13}$ | n.d.                    | n.d.                    | n.d.                    |
| <b>60</b> | $3.409 \times 10^{-13}$ | $1.404 \times 10^{-13}$ | n.d.                    | n.d.                    |
| <b>70</b> | $7.346 \times 10^{-13}$ | $3.349 \times 10^{-13}$ | $9.796 \times 10^{-14}$ | n.d.                    |
| <b>80</b> | $1.402 \times 10^{-12}$ | $6.799 \times 10^{-13}$ | $2.388 \times 10^{-13}$ | $1.029 \times 10^{-13}$ |

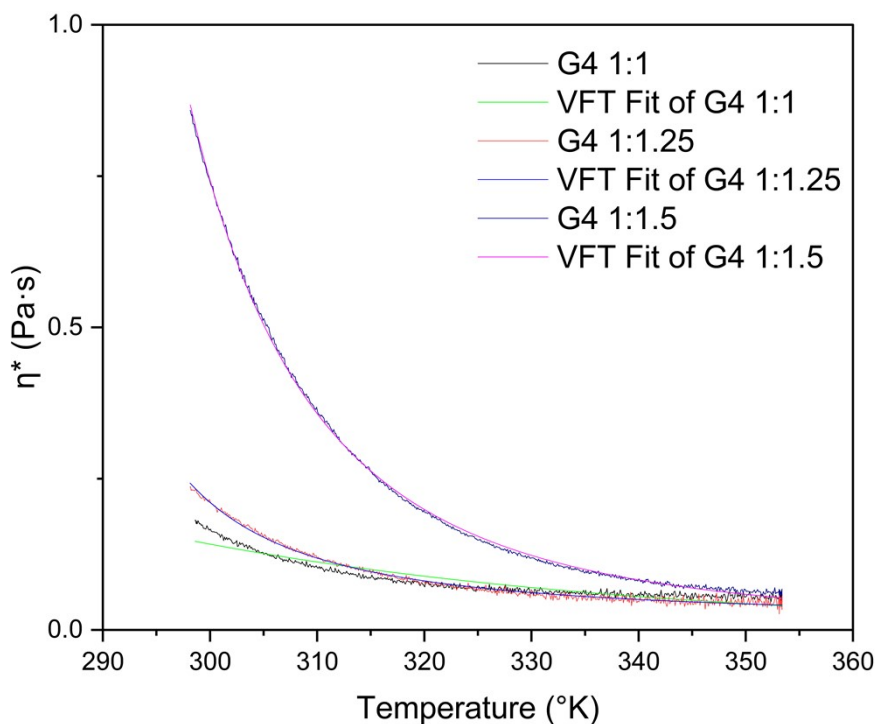

**Fig S12.** Complex viscosity vs temperature with VFT fitting curves for G4 SIL samples 1:1 through to 1:1.5.

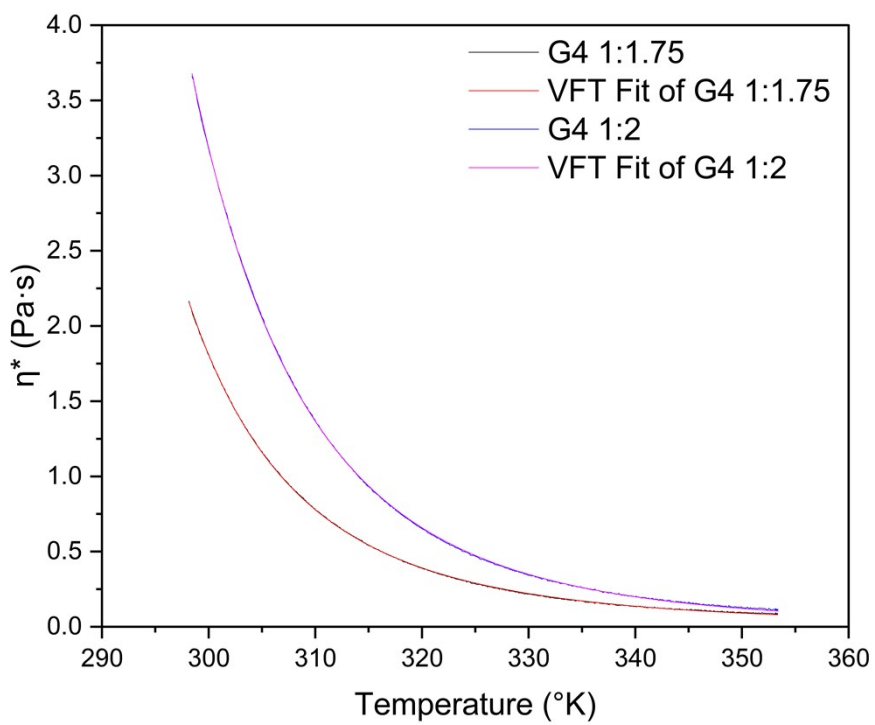

**Fig S13.** Complex viscosity vs temperature with VFT fitting curves for G4 SIL samples 1:1.75 through to 1:2.

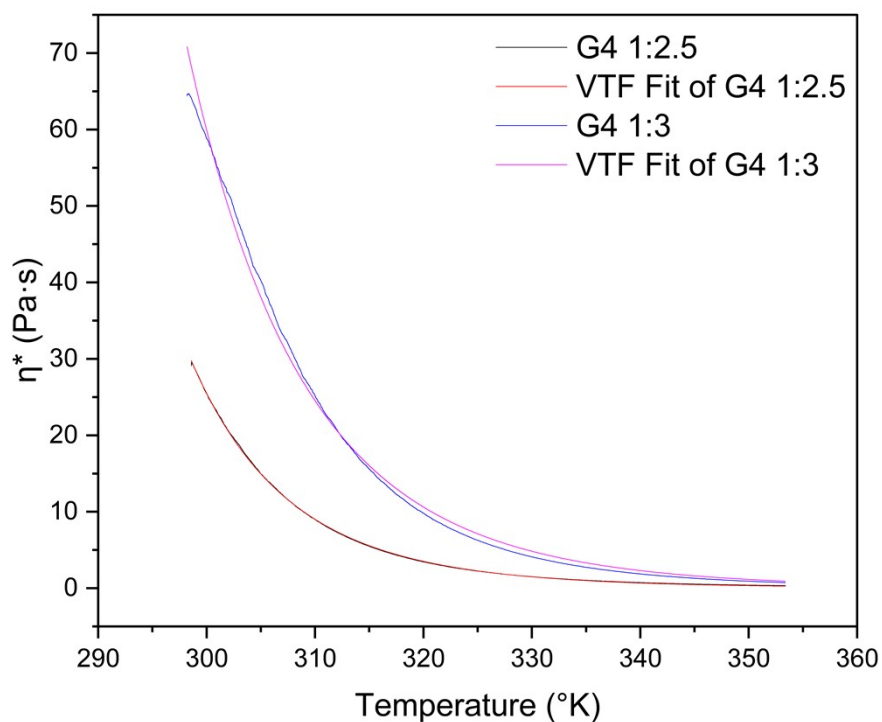

**Fig S14.** Complex viscosity vs temperature with VFT fitting curves for G4 SIL samples 1:2.5 through to 1:3.

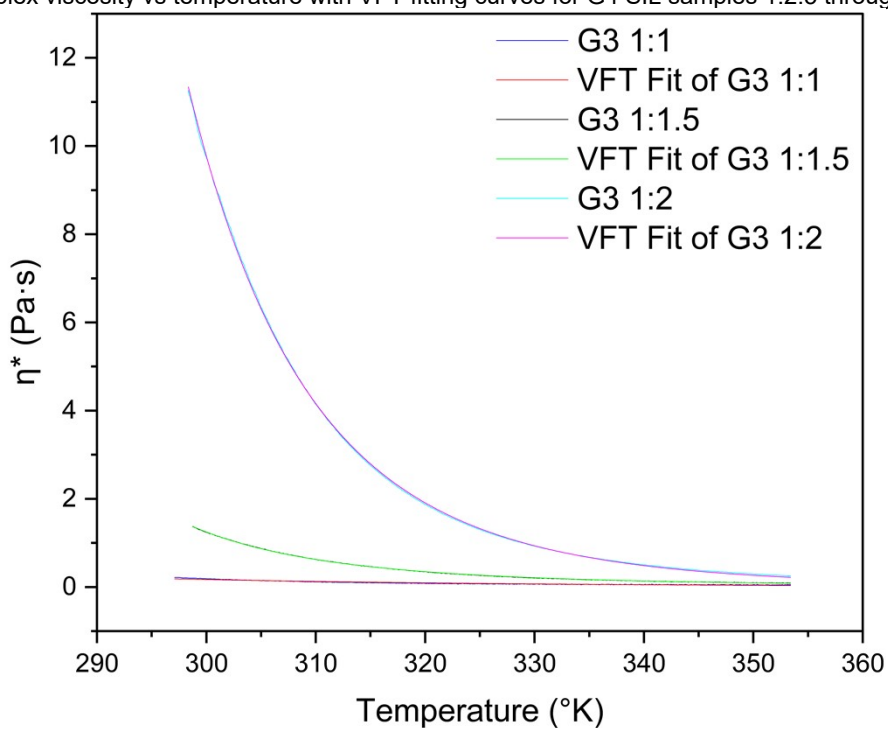

**Fig S15.** Complex viscosity vs temperature with VFT fitting curves for G3 SIL samples 1:1 through to 1:2.

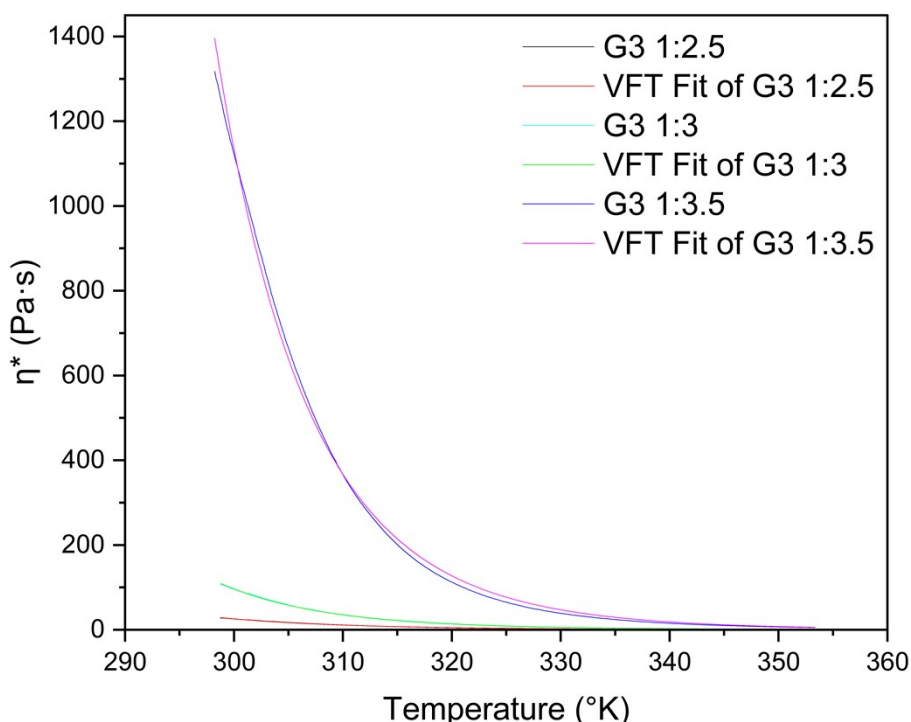

**Fig S16.** Complex viscosity vs temperature with VFT fitting curves for G3 SIL samples 1:2.5 through to 1:3.5. Complex viscosity vs temperature of G3-1:4 could not be measured by rheology as loading of this sample onto the rheometer without significant void formation, resulting in measurement errors, was not possible.

Highly viscous samples, G3-1:3.5 & G4-1:3, were loaded onto the rheometer at 140 °C and allowed to cool to RT on the lower parallel plate. This technique, termed 'hot loading', prevented void formation in these highly viscous samples that interferes with rheological measurements. After the gap distance was set to 525  $\mu\text{m}$  (gap + trim distance) the side of the top parallel plate was cleared of any extruded sample to avoid interference in rheological measurements.

**Table S11.** VFT equation parameters of viscosity data.

|                  | $\eta^{*0}$ (Pa·s) | $\eta^{*0}$ StD<br>Error | B (°K)            | B StD<br>Error    | T <sup>0</sup> (°K)    | T <sup>0</sup> StD<br>Error | R <sup>2</sup> |
|------------------|--------------------|--------------------------|-------------------|-------------------|------------------------|-----------------------------|----------------|
| <b>G4-1:1</b>    | $2.7 \times 10^1$  | $7.9 \times 10^1$        | $7.8 \times 10^4$ | $4.3 \times 10^5$ | $3.1 \times 10^3$      | $7.7 \times 10^3$           | 0.8718         |
| <b>G4-1:1.25</b> | $-1.9 \times 10^0$ | $1.6 \times 10^{-2}$     | $4.9 \times 10^1$ | $1.7 \times 10^0$ | $2.6 \times 10^2$      | $9.0 \times 10^{-1}$        | 0.9909         |
| <b>G4-1:1.5</b>  | $-3.0 \times 10^0$ | $2.4 \times 10^{-2}$     | $2.3 \times 10^2$ | $4.4 \times 10^0$ | $2.2 \times 10^2$      | $8.8 \times 10^{-1}$        | 0.9993         |
| <b>G4-1:1.75</b> | $-3.3 \times 10^0$ | $1.1 \times 10^{-2}$     | $3.2 \times 10^2$ | $2.3 \times 10^0$ | $2.1 \times 10^2$      | $3.5 \times 10^{-1}$        | 0.9999         |
| <b>G4-1:2</b>    | $-4.5 \times 10^0$ | $2.1 \times 10^{-2}$     | $6.2 \times 10^2$ | $5.6 \times 10^0$ | $1.7 \times 10^2$      | $6.1 \times 10^{-1}$        | 1.0000         |
| <b>G4-1:2.5</b>  | $-7.8 \times 10^0$ | $1.2 \times 10^{-1}$     | $1.8 \times 10^3$ | $5.0 \times 10^1$ | $1.1 \times 10^2$      | $2.8 \times 10^0$           | 0.9999         |
| <b>G4-1:3</b>    | $-1.0 \times 10^1$ | $1.2 \times 10^0$        | $3.6 \times 10^3$ | $7.3 \times 10^2$ | $0.0 \times 10^0$      | $3.1 \times 10^1$           | 0.9964         |
| <b>G3-1:1</b>    | $1.5 \times 10^1$  | $1.5 \times 10^1$        | $2.0 \times 10^4$ | $3.7 \times 10^4$ | $1.6 \times 10^3$      | $1.1 \times 10^3$           | 0.9329         |
| <b>G3-1:1.5</b>  | $-3.4 \times 10^0$ | $2.0 \times 10^{-2}$     | $3.8 \times 10^2$ | $4.7 \times 10^0$ | $1.9 \times 10^2$      | $7.4 \times 10^{-1}$        | 0.9998         |
| <b>G3-1:2</b>    | $-7.0 \times 10^0$ | $9.6 \times 10^{-2}$     | $1.7 \times 10^3$ | $4.1 \times 10^1$ | $9.4 \times 10^1$      | $2.7 \times 10^0$           | 0.9999         |
| <b>G3-1:2.5</b>  | $-9.9 \times 10^0$ | $5.4 \times 10^{-1}$     | $3.4 \times 10^3$ | $3.4 \times 10^2$ | $0.0 \times 10^0$      | $1.5 \times 10^1$           | 0.9990         |
| <b>G3-1:3</b>    | $-1.1 \times 10^1$ | $4.6 \times 10^{-1}$     | $4.0 \times 10^3$ | $2.8 \times 10^2$ | $0.0 \times 10^0$      | $1.1 \times 10^1$           | 0.9997         |
| <b>G3-1:3.5</b>  | $-1.2 \times 10^1$ | $1.5 \times 10^0$        | $4.6 \times 10^3$ | $8.9 \times 10^2$ | $1.3 \times 10^{-203}$ | $3.0 \times 10^1$           | 0.9980         |



**Table S12.** Complex viscosity (Pa·s) vs. temperature (°C) raw data for G3 samples 1:1 through to 1:3.5.

| 1:1   |          | 1:1.5 |          | 1:2   |          | 1:2.5 |          | 1:3   |          | 1:3.5 |          |
|-------|----------|-------|----------|-------|----------|-------|----------|-------|----------|-------|----------|
| Temp  | $\eta^*$ |
| 23.95 | 0.218    | 25.60 | 1.368    | 25.23 | 11.241   | 25.62 | 26.962   | 25.65 | 105.988  | 25.08 | 1317.70  |
| 24.21 | 0.216    | 25.60 | 1.374    | 25.20 | 11.265   | 25.62 | 27.175   | 25.66 | 106.144  | 25.14 | 1310.08  |
| 24.45 | 0.218    | 25.62 | 1.370    | 25.20 | 11.254   | 25.62 | 27.230   | 25.66 | 106.633  | 25.22 | 1299.57  |
| 24.70 | 0.203    | 25.62 | 1.364    | 25.22 | 11.220   | 25.62 | 27.384   | 25.68 | 106.817  | 25.35 | 1287.76  |
| 24.92 | 0.207    | 25.63 | 1.372    | 25.26 | 11.195   | 25.63 | 27.527   | 25.68 | 107.376  | 25.44 | 1276.72  |
| 25.13 | 0.206    | 25.63 | 1.368    | 25.30 | 11.155   | 25.64 | 27.656   | 25.68 | 107.642  | 25.56 | 1261.83  |
| 25.33 | 0.202    | 25.66 | 1.371    | 25.37 | 11.102   | 25.66 | 27.897   | 25.69 | 107.854  | 25.67 | 1248.71  |
| 25.55 | 0.202    | 25.67 | 1.369    | 25.44 | 11.033   | 25.65 | 27.906   | 25.72 | 107.393  | 25.80 | 1234.07  |
| 25.73 | 0.199    | 25.69 | 1.360    | 25.56 | 10.938   | 25.71 | 27.896   | 25.77 | 106.955  | 25.90 | 1220.49  |
| 25.90 | 0.201    | 25.76 | 1.354    | 25.64 | 10.861   | 25.75 | 27.915   | 25.82 | 106.338  | 26.02 | 1207.25  |
| 26.05 | 0.193    | 25.83 | 1.346    | 25.74 | 10.747   | 25.82 | 27.838   | 25.88 | 105.866  | 26.14 | 1193.61  |
| 26.20 | 0.198    | 25.91 | 1.341    | 25.85 | 10.618   | 25.89 | 27.694   | 25.95 | 104.848  | 26.27 | 1180.23  |
| 26.33 | 0.195    | 26.00 | 1.325    | 25.97 | 10.494   | 25.98 | 27.554   | 26.04 | 103.971  | 26.39 | 1168.98  |
| 26.46 | 0.194    | 26.10 | 1.315    | 26.09 | 10.334   | 26.09 | 27.335   | 26.14 | 102.715  | 26.49 | 1156.83  |
| 26.56 | 0.189    | 26.19 | 1.301    | 26.24 | 10.215   | 26.18 | 27.064   | 26.25 | 101.660  | 26.62 | 1145.86  |
| 26.68 | 0.191    | 26.30 | 1.297    | 26.34 | 10.098   | 26.30 | 26.784   | 26.35 | 100.444  | 26.72 | 1135.60  |
| 26.77 | 0.189    | 26.42 | 1.287    | 26.48 | 10.003   | 26.41 | 26.535   | 26.47 | 99.182   | 26.82 | 1125.11  |
| 26.85 | 0.190    | 26.52 | 1.274    | 26.62 | 9.918    | 26.53 | 26.238   | 26.57 | 98.097   | 26.92 | 1115.21  |
| 26.94 | 0.186    | 26.66 | 1.257    | 26.73 | 9.816    | 26.64 | 25.955   | 26.70 | 96.890   | 27.01 | 1106.27  |
| 27.03 | 0.184    | 26.79 | 1.246    | 26.85 | 9.736    | 26.77 | 25.688   | 26.82 | 95.825   | 27.11 | 1097.30  |
| 27.09 | 0.183    | 26.91 | 1.239    | 26.95 | 9.673    | 26.90 | 25.489   | 26.94 | 94.862   | 27.20 | 1088.21  |
| 27.18 | 0.188    | 27.01 | 1.231    | 27.07 | 9.588    | 26.99 | 25.266   | 27.05 | 93.602   | 27.31 | 1079.40  |
| 27.27 | 0.183    | 27.12 | 1.216    | 27.18 | 9.484    | 27.12 | 25.079   | 27.18 | 92.562   | 27.38 | 1070.62  |
| 27.33 | 0.183    | 27.24 | 1.210    | 27.28 | 9.392    | 27.25 | 24.873   | 27.29 | 91.568   | 27.47 | 1060.86  |
| 27.41 | 0.182    | 27.36 | 1.204    | 27.36 | 9.331    | 27.34 | 24.592   | 27.40 | 90.565   | 27.58 | 1052.05  |
| 27.49 | 0.186    | 27.45 | 1.190    | 27.47 | 9.223    | 27.47 | 24.408   | 27.50 | 89.737   | 27.67 | 1042.88  |
| 27.57 | 0.183    | 27.56 | 1.182    | 27.58 | 9.126    | 27.56 | 24.173   | 27.60 | 89.176   | 27.79 | 1033.96  |
| 27.67 | 0.181    | 27.67 | 1.168    | 27.67 | 9.068    | 27.66 | 24.030   | 27.72 | 88.160   | 27.86 | 1025.37  |
| 27.73 | 0.180    | 27.75 | 1.165    | 27.78 | 9.015    | 27.75 | 23.846   | 27.82 | 87.420   | 27.95 | 1017.05  |
| 27.82 | 0.178    | 27.86 | 1.151    | 27.85 | 8.961    | 27.86 | 23.635   | 27.93 | 86.808   | 28.04 | 1007.02  |
| 27.92 | 0.182    | 27.97 | 1.150    | 27.95 | 8.909    | 27.97 | 23.495   | 28.01 | 86.175   | 28.15 | 998.96   |
| 28.01 | 0.177    | 28.06 | 1.142    | 28.07 | 8.858    | 28.05 | 23.372   | 28.12 | 85.613   | 28.25 | 988.54   |
| 28.11 | 0.178    | 28.16 | 1.133    | 28.13 | 8.775    | 28.15 | 23.195   | 28.21 | 84.884   | 28.34 | 979.66   |
| 28.20 | 0.169    | 28.23 | 1.125    | 28.24 | 8.697    | 28.23 | 23.185   | 28.29 | 84.386   | 28.43 | 970.36   |
| 28.29 | 0.174    | 28.33 | 1.116    | 28.33 | 8.638    | 28.32 | 23.038   | 28.39 | 83.607   | 28.54 | 961.30   |
| 28.39 | 0.174    | 28.43 | 1.112    | 28.43 | 8.552    | 28.42 | 22.950   | 28.48 | 83.135   | 28.65 | 951.82   |
| 28.49 | 0.170    | 28.53 | 1.101    | 28.52 | 8.478    | 28.52 | 22.768   | 28.57 | 82.571   | 28.73 | 942.99   |
| 28.60 | 0.173    | 28.63 | 1.100    | 28.59 | 8.410    | 28.60 | 22.637   | 28.67 | 81.887   | 28.81 | 933.11   |

|       |       |       |       |       |       |       |        |       |        |       |        |
|-------|-------|-------|-------|-------|-------|-------|--------|-------|--------|-------|--------|
| 28.69 | 0.172 | 28.71 | 1.090 | 28.67 | 8.350 | 28.69 | 22.423 | 28.75 | 81.238 | 28.91 | 922.89 |
| 28.78 | 0.170 | 28.81 | 1.082 | 28.75 | 8.306 | 28.79 | 22.241 | 28.83 | 80.510 | 29.01 | 913.99 |
| 28.90 | 0.173 | 28.88 | 1.075 | 28.86 | 8.239 | 28.88 | 22.072 | 28.92 | 79.919 | 29.11 | 904.07 |
| 28.99 | 0.172 | 28.99 | 1.068 | 28.94 | 8.195 | 28.97 | 21.880 | 29.02 | 79.112 | 29.22 | 894.48 |
| 29.10 | 0.169 | 29.09 | 1.062 | 29.07 | 8.130 | 29.07 | 21.708 | 29.11 | 78.254 | 29.31 | 885.71 |
| 29.20 | 0.166 | 29.18 | 1.054 | 29.14 | 8.044 | 29.15 | 21.543 | 29.19 | 77.663 | 29.42 | 876.64 |
| 29.29 | 0.164 | 29.27 | 1.047 | 29.22 | 7.991 | 29.24 | 21.371 | 29.28 | 76.722 | 29.51 | 867.07 |
| 29.37 | 0.162 | 29.37 | 1.042 | 29.34 | 7.933 | 29.34 | 21.238 | 29.37 | 75.921 | 29.61 | 858.20 |
| 29.48 | 0.166 | 29.47 | 1.030 | 29.43 | 7.855 | 29.43 | 21.064 | 29.46 | 75.275 | 29.70 | 848.99 |
| 29.58 | 0.164 | 29.57 | 1.027 | 29.53 | 7.780 | 29.54 | 20.902 | 29.55 | 74.456 | 29.80 | 839.08 |
| 29.67 | 0.163 | 29.65 | 1.016 | 29.62 | 7.708 | 29.63 | 20.675 | 29.65 | 73.633 | 29.89 | 830.38 |
| 29.75 | 0.162 | 29.74 | 1.013 | 29.72 | 7.636 | 29.73 | 20.532 | 29.76 | 72.886 | 30.00 | 821.50 |
| 29.83 | 0.160 | 29.84 | 1.004 | 29.82 | 7.579 | 29.81 | 20.328 | 29.85 | 72.172 | 30.08 | 813.18 |
| 29.96 | 0.162 | 29.95 | 0.998 | 29.90 | 7.529 | 29.91 | 20.194 | 29.93 | 71.398 | 30.18 | 804.43 |
| 30.05 | 0.157 | 30.03 | 0.988 | 29.99 | 7.461 | 30.01 | 20.064 | 30.03 | 70.857 | 30.26 | 795.22 |
| 30.14 | 0.157 | 30.12 | 0.982 | 30.09 | 7.387 | 30.11 | 19.907 | 30.11 | 69.983 | 30.37 | 786.06 |
| 30.24 | 0.156 | 30.21 | 0.976 | 30.19 | 7.356 | 30.19 | 19.777 | 30.23 | 69.490 | 30.47 | 777.96 |
| 30.34 | 0.161 | 30.33 | 0.973 | 30.28 | 7.314 | 30.29 | 19.639 | 30.31 | 68.748 | 30.56 | 768.56 |
| 30.44 | 0.155 | 30.42 | 0.963 | 30.36 | 7.254 | 30.38 | 19.603 | 30.41 | 68.075 | 30.66 | 760.95 |
| 30.53 | 0.160 | 30.52 | 0.957 | 30.47 | 7.173 | 30.48 | 19.450 | 30.51 | 67.402 | 30.76 | 752.70 |
| 30.61 | 0.154 | 30.61 | 0.956 | 30.56 | 7.119 | 30.58 | 19.322 | 30.62 | 66.880 | 30.84 | 744.32 |
| 30.71 | 0.155 | 30.72 | 0.943 | 30.66 | 7.063 | 30.67 | 19.205 | 30.70 | 66.180 | 30.94 | 737.20 |
| 30.79 | 0.155 | 30.82 | 0.942 | 30.76 | 6.978 | 30.76 | 19.011 | 30.79 | 65.618 | 31.06 | 728.57 |
| 30.91 | 0.158 | 30.89 | 0.932 | 30.83 | 6.942 | 30.85 | 18.832 | 30.89 | 64.877 | 31.14 | 720.83 |
| 30.99 | 0.152 | 31.00 | 0.924 | 30.93 | 6.876 | 30.94 | 18.674 | 30.97 | 64.306 | 31.24 | 712.77 |
| 31.09 | 0.150 | 31.08 | 0.925 | 31.04 | 6.811 | 31.04 | 18.538 | 31.06 | 63.833 | 31.33 | 704.79 |
| 31.19 | 0.152 | 31.18 | 0.913 | 31.13 | 6.763 | 31.12 | 18.382 | 31.17 | 63.059 | 31.44 | 697.69 |
| 31.30 | 0.149 | 31.28 | 0.907 | 31.22 | 6.717 | 31.23 | 18.197 | 31.25 | 62.541 | 31.52 | 689.45 |
| 31.40 | 0.153 | 31.38 | 0.907 | 31.34 | 6.675 | 31.33 | 18.041 | 31.35 | 61.763 | 31.62 | 682.50 |
| 31.47 | 0.148 | 31.46 | 0.901 | 31.42 | 6.614 | 31.42 | 17.912 | 31.45 | 61.260 | 31.71 | 674.19 |
| 31.58 | 0.153 | 31.56 | 0.888 | 31.52 | 6.550 | 31.51 | 17.758 | 31.55 | 60.624 | 31.82 | 667.36 |
| 31.67 | 0.144 | 31.66 | 0.889 | 31.61 | 6.500 | 31.61 | 17.541 | 31.64 | 60.088 | 31.91 | 660.17 |
| 31.75 | 0.148 | 31.78 | 0.877 | 31.70 | 6.426 | 31.70 | 17.397 | 31.73 | 59.401 | 32.00 | 653.23 |
| 31.87 | 0.140 | 31.84 | 0.870 | 31.77 | 6.385 | 31.80 | 17.250 | 31.84 | 58.765 | 32.11 | 646.28 |
| 31.96 | 0.149 | 31.96 | 0.866 | 31.87 | 6.331 | 31.90 | 17.119 | 31.92 | 58.207 | 32.19 | 638.78 |
| 32.05 | 0.148 | 32.06 | 0.858 | 31.99 | 6.281 | 31.99 | 17.015 | 32.02 | 57.566 | 32.30 | 631.90 |
| 32.16 | 0.149 | 32.13 | 0.856 | 32.08 | 6.227 | 32.07 | 16.887 | 32.11 | 56.897 | 32.39 | 624.04 |
| 32.24 | 0.142 | 32.24 | 0.857 | 32.16 | 6.191 | 32.18 | 16.806 | 32.21 | 56.343 | 32.48 | 617.65 |
| 32.35 | 0.142 | 32.35 | 0.842 | 32.24 | 6.145 | 32.28 | 16.686 | 32.31 | 55.739 | 32.58 | 610.57 |
| 32.44 | 0.140 | 32.42 | 0.838 | 32.36 | 6.093 | 32.36 | 16.591 | 32.39 | 55.264 | 32.69 | 604.42 |
| 32.54 | 0.140 | 32.53 | 0.834 | 32.45 | 6.050 | 32.46 | 16.502 | 32.47 | 54.584 | 32.79 | 597.85 |
| 32.64 | 0.144 | 32.62 | 0.828 | 32.53 | 5.991 | 32.56 | 16.420 | 32.58 | 54.038 | 32.87 | 591.13 |

|       |       |       |       |       |       |       |        |       |        |       |        |
|-------|-------|-------|-------|-------|-------|-------|--------|-------|--------|-------|--------|
| 32.73 | 0.143 | 32.71 | 0.821 | 32.64 | 5.957 | 32.65 | 16.260 | 32.68 | 53.526 | 32.97 | 584.45 |
| 32.80 | 0.139 | 32.81 | 0.820 | 32.73 | 5.899 | 32.73 | 16.141 | 32.76 | 53.101 | 33.07 | 577.56 |
| 32.91 | 0.142 | 32.90 | 0.808 | 32.81 | 5.835 | 32.84 | 15.965 | 32.86 | 52.660 | 33.18 | 570.54 |
| 33.01 | 0.139 | 33.01 | 0.806 | 32.90 | 5.796 | 32.92 | 15.820 | 32.95 | 52.079 | 33.25 | 564.30 |
| 33.11 | 0.137 | 33.09 | 0.801 | 33.02 | 5.752 | 33.01 | 15.634 | 33.04 | 51.697 | 33.37 | 558.10 |
| 33.20 | 0.135 | 33.20 | 0.794 | 33.12 | 5.699 | 33.11 | 15.511 | 33.13 | 51.230 | 33.45 | 551.96 |
| 33.29 | 0.142 | 33.29 | 0.792 | 33.22 | 5.647 | 33.21 | 15.415 | 33.22 | 50.954 | 33.57 | 545.21 |
| 33.41 | 0.139 | 33.39 | 0.784 | 33.31 | 5.619 | 33.31 | 15.261 | 33.32 | 50.500 | 33.64 | 539.75 |
| 33.49 | 0.135 | 33.48 | 0.785 | 33.39 | 5.566 | 33.39 | 15.146 | 33.43 | 50.087 | 33.75 | 533.36 |
| 33.58 | 0.133 | 33.56 | 0.780 | 33.50 | 5.535 | 33.49 | 14.996 | 33.51 | 49.662 | 33.83 | 527.34 |
| 33.67 | 0.136 | 33.66 | 0.771 | 33.58 | 5.489 | 33.58 | 14.865 | 33.60 | 49.313 | 33.94 | 521.03 |
| 33.78 | 0.137 | 33.76 | 0.758 | 33.68 | 5.442 | 33.68 | 14.719 | 33.72 | 48.644 | 34.03 | 515.27 |
| 33.86 | 0.136 | 33.86 | 0.766 | 33.76 | 5.406 | 33.79 | 14.600 | 33.79 | 48.410 | 34.13 | 509.16 |
| 33.96 | 0.135 | 33.94 | 0.754 | 33.84 | 5.345 | 33.85 | 14.513 | 33.89 | 48.165 | 34.23 | 503.27 |
| 34.06 | 0.135 | 34.05 | 0.752 | 33.95 | 5.304 | 33.96 | 14.402 | 34.00 | 47.621 | 34.33 | 497.54 |
| 34.16 | 0.132 | 34.13 | 0.748 | 34.06 | 5.252 | 34.07 | 14.323 | 34.07 | 47.192 | 34.42 | 491.82 |
| 34.26 | 0.133 | 34.24 | 0.742 | 34.15 | 5.216 | 34.15 | 14.217 | 34.18 | 46.744 | 34.51 | 486.62 |
| 34.35 | 0.132 | 34.33 | 0.740 | 34.26 | 5.181 | 34.24 | 14.144 | 34.27 | 46.325 | 34.61 | 480.48 |
| 34.44 | 0.133 | 34.43 | 0.733 | 34.35 | 5.144 | 34.34 | 14.013 | 34.36 | 45.772 | 34.71 | 475.04 |
| 34.54 | 0.130 | 34.52 | 0.728 | 34.42 | 5.105 | 34.44 | 13.932 | 34.45 | 45.337 | 34.81 | 469.41 |
| 34.64 | 0.132 | 34.62 | 0.728 | 34.52 | 5.058 | 34.54 | 13.832 | 34.55 | 44.855 | 34.91 | 464.30 |
| 34.74 | 0.130 | 34.71 | 0.722 | 34.64 | 5.013 | 34.62 | 13.691 | 34.64 | 44.408 | 35.00 | 458.54 |
| 34.85 | 0.126 | 34.80 | 0.714 | 34.69 | 4.988 | 34.71 | 13.568 | 34.73 | 43.930 | 35.10 | 453.29 |
| 34.91 | 0.131 | 34.90 | 0.710 | 34.82 | 4.939 | 34.80 | 13.435 | 34.83 | 43.405 | 35.20 | 448.20 |
| 35.04 | 0.132 | 34.99 | 0.708 | 34.91 | 4.901 | 34.90 | 13.304 | 34.95 | 42.925 | 35.29 | 442.96 |
| 35.13 | 0.129 | 35.11 | 0.701 | 34.99 | 4.862 | 35.01 | 13.200 | 35.01 | 42.444 | 35.38 | 437.86 |
| 35.21 | 0.131 | 35.18 | 0.701 | 35.10 | 4.812 | 35.11 | 13.098 | 35.11 | 41.972 | 35.47 | 433.37 |
| 35.30 | 0.130 | 35.28 | 0.696 | 35.19 | 4.779 | 35.18 | 12.964 | 35.22 | 41.590 | 35.57 | 428.06 |
| 35.41 | 0.124 | 35.37 | 0.693 | 35.29 | 4.731 | 35.29 | 12.859 | 35.31 | 41.177 | 35.67 | 422.82 |
| 35.49 | 0.126 | 35.47 | 0.686 | 35.38 | 4.708 | 35.39 | 12.731 | 35.40 | 40.725 | 35.75 | 417.92 |
| 35.59 | 0.126 | 35.57 | 0.678 | 35.47 | 4.663 | 35.48 | 12.628 | 35.50 | 40.433 | 35.86 | 412.95 |
| 35.66 | 0.122 | 35.67 | 0.680 | 35.57 | 4.631 | 35.58 | 12.550 | 35.59 | 39.963 | 35.96 | 408.05 |
| 35.76 | 0.125 | 35.75 | 0.667 | 35.66 | 4.586 | 35.66 | 12.457 | 35.68 | 39.669 | 36.07 | 403.14 |
| 35.87 | 0.119 | 35.86 | 0.666 | 35.77 | 4.547 | 35.76 | 12.404 | 35.78 | 39.346 | 36.17 | 398.80 |
| 35.96 | 0.120 | 35.94 | 0.660 | 35.86 | 4.510 | 35.85 | 12.291 | 35.89 | 38.983 | 36.25 | 393.97 |
| 36.06 | 0.120 | 36.04 | 0.660 | 35.96 | 4.487 | 35.93 | 12.207 | 35.97 | 38.552 | 36.34 | 389.01 |
| 36.16 | 0.119 | 36.15 | 0.650 | 36.05 | 4.454 | 36.05 | 12.107 | 36.07 | 38.201 | 36.45 | 384.43 |
| 36.24 | 0.126 | 36.24 | 0.653 | 36.14 | 4.408 | 36.15 | 12.000 | 36.16 | 37.837 | 36.55 | 379.78 |
| 36.34 | 0.119 | 36.34 | 0.647 | 36.24 | 4.371 | 36.23 | 11.941 | 36.25 | 37.501 | 36.65 | 375.39 |
| 36.44 | 0.119 | 36.45 | 0.644 | 36.33 | 4.336 | 36.33 | 11.851 | 36.34 | 37.056 | 36.74 | 370.98 |
| 36.53 | 0.124 | 36.55 | 0.641 | 36.43 | 4.301 | 36.42 | 11.779 | 36.42 | 36.742 | 36.84 | 367.08 |
| 36.63 | 0.122 | 36.63 | 0.634 | 36.52 | 4.265 | 36.51 | 11.648 | 36.52 | 36.327 | 36.93 | 362.68 |

|       |       |       |       |       |       |       |        |       |        |       |        |
|-------|-------|-------|-------|-------|-------|-------|--------|-------|--------|-------|--------|
| 36.74 | 0.119 | 36.73 | 0.631 | 36.60 | 4.236 | 36.62 | 11.525 | 36.63 | 35.939 | 37.03 | 358.07 |
| 36.83 | 0.119 | 36.82 | 0.630 | 36.70 | 4.201 | 36.69 | 11.429 | 36.72 | 35.601 | 37.12 | 354.12 |
| 36.93 | 0.117 | 36.92 | 0.625 | 36.79 | 4.161 | 36.81 | 11.340 | 36.82 | 35.279 | 37.21 | 349.72 |
| 37.03 | 0.118 | 37.00 | 0.618 | 36.91 | 4.131 | 36.91 | 11.202 | 36.91 | 34.809 | 37.31 | 346.41 |
| 37.11 | 0.116 | 37.11 | 0.609 | 36.99 | 4.104 | 36.99 | 11.146 | 37.00 | 34.533 | 37.41 | 342.13 |
| 37.21 | 0.121 | 37.21 | 0.616 | 37.08 | 4.072 | 37.08 | 11.017 | 37.11 | 34.229 | 37.51 | 338.26 |
| 37.32 | 0.119 | 37.31 | 0.607 | 37.18 | 4.037 | 37.19 | 10.935 | 37.19 | 33.888 | 37.59 | 334.38 |
| 37.41 | 0.111 | 37.38 | 0.601 | 37.28 | 4.006 | 37.28 | 10.834 | 37.29 | 33.583 | 37.69 | 330.04 |
| 37.52 | 0.109 | 37.48 | 0.606 | 37.37 | 3.979 | 37.37 | 10.757 | 37.38 | 33.280 | 37.81 | 326.71 |
| 37.61 | 0.116 | 37.58 | 0.597 | 37.47 | 3.946 | 37.46 | 10.698 | 37.47 | 32.950 | 37.89 | 322.71 |
| 37.71 | 0.112 | 37.65 | 0.597 | 37.58 | 3.914 | 37.55 | 10.590 | 37.57 | 32.711 | 37.98 | 319.25 |
| 37.79 | 0.111 | 37.77 | 0.590 | 37.65 | 3.889 | 37.65 | 10.546 | 37.67 | 32.490 | 38.08 | 315.21 |
| 37.89 | 0.109 | 37.85 | 0.588 | 37.76 | 3.846 | 37.74 | 10.447 | 37.76 | 32.286 | 38.18 | 312.06 |
| 37.99 | 0.114 | 37.96 | 0.584 | 37.84 | 3.821 | 37.84 | 10.356 | 37.87 | 32.106 | 38.27 | 308.66 |
| 38.08 | 0.112 | 38.06 | 0.578 | 37.94 | 3.782 | 37.94 | 10.294 | 37.95 | 31.793 | 38.37 | 304.69 |
| 38.18 | 0.114 | 38.14 | 0.578 | 38.04 | 3.763 | 38.04 | 10.226 | 38.05 | 31.605 | 38.47 | 300.90 |
| 38.27 | 0.118 | 38.23 | 0.579 | 38.13 | 3.735 | 38.12 | 10.140 | 38.14 | 31.326 | 38.57 | 298.05 |
| 38.36 | 0.107 | 38.33 | 0.572 | 38.23 | 3.703 | 38.23 | 10.062 | 38.22 | 30.984 | 38.68 | 294.32 |
| 38.48 | 0.111 | 38.44 | 0.572 | 38.31 | 3.671 | 38.31 | 9.961  | 38.32 | 30.691 | 38.75 | 290.90 |
| 38.55 | 0.107 | 38.53 | 0.562 | 38.42 | 3.655 | 38.41 | 9.911  | 38.42 | 30.349 | 38.86 | 287.71 |
| 38.65 | 0.115 | 38.63 | 0.563 | 38.52 | 3.624 | 38.49 | 9.825  | 38.52 | 30.017 | 38.95 | 284.35 |
| 38.76 | 0.109 | 38.72 | 0.556 | 38.62 | 3.593 | 38.60 | 9.695  | 38.60 | 29.743 | 39.06 | 281.10 |
| 38.82 | 0.106 | 38.82 | 0.554 | 38.68 | 3.557 | 38.69 | 9.660  | 38.70 | 29.398 | 39.14 | 278.08 |
| 38.93 | 0.108 | 38.92 | 0.547 | 38.79 | 3.534 | 38.78 | 9.563  | 38.80 | 28.978 | 39.25 | 274.83 |
| 39.02 | 0.105 | 39.01 | 0.548 | 38.88 | 3.515 | 38.90 | 9.455  | 38.91 | 28.724 | 39.35 | 271.76 |
| 39.13 | 0.105 | 39.10 | 0.544 | 38.97 | 3.480 | 38.99 | 9.365  | 38.99 | 28.502 | 39.43 | 268.87 |
| 39.24 | 0.107 | 39.20 | 0.545 | 39.07 | 3.450 | 39.06 | 9.302  | 39.08 | 28.149 | 39.51 | 265.54 |
| 39.32 | 0.104 | 39.30 | 0.535 | 39.15 | 3.433 | 39.17 | 9.227  | 39.19 | 27.923 | 39.64 | 262.52 |
| 39.42 | 0.104 | 39.39 | 0.535 | 39.26 | 3.396 | 39.26 | 9.147  | 39.28 | 27.639 | 39.72 | 259.57 |
| 39.51 | 0.107 | 39.50 | 0.533 | 39.34 | 3.374 | 39.37 | 9.062  | 39.38 | 27.420 | 39.82 | 256.89 |
| 39.62 | 0.106 | 39.58 | 0.530 | 39.46 | 3.350 | 39.45 | 9.016  | 39.47 | 27.168 | 39.92 | 253.86 |
| 39.72 | 0.106 | 39.68 | 0.528 | 39.53 | 3.321 | 39.53 | 8.963  | 39.57 | 26.937 | 40.01 | 250.73 |
| 39.80 | 0.107 | 39.78 | 0.527 | 39.62 | 3.298 | 39.65 | 8.891  | 39.66 | 26.695 | 40.11 | 248.37 |
| 39.90 | 0.106 | 39.88 | 0.521 | 39.72 | 3.278 | 39.74 | 8.832  | 39.75 | 26.466 | 40.20 | 245.41 |
| 40.00 | 0.109 | 39.98 | 0.519 | 39.83 | 3.249 | 39.83 | 8.757  | 39.85 | 26.168 | 40.30 | 242.71 |
| 40.10 | 0.108 | 40.06 | 0.514 | 39.91 | 3.216 | 39.94 | 8.683  | 39.93 | 25.949 | 40.39 | 239.96 |
| 40.18 | 0.105 | 40.15 | 0.504 | 40.02 | 3.200 | 40.03 | 8.628  | 40.02 | 25.677 | 40.49 | 236.75 |
| 40.28 | 0.106 | 40.26 | 0.507 | 40.10 | 3.173 | 40.11 | 8.563  | 40.13 | 25.347 | 40.59 | 234.29 |
| 40.38 | 0.102 | 40.35 | 0.501 | 40.21 | 3.146 | 40.22 | 8.517  | 40.22 | 25.100 | 40.69 | 231.52 |
| 40.47 | 0.103 | 40.44 | 0.501 | 40.30 | 3.136 | 40.31 | 8.430  | 40.30 | 24.890 | 40.77 | 228.69 |
| 40.58 | 0.099 | 40.53 | 0.499 | 40.39 | 3.100 | 40.42 | 8.347  | 40.41 | 24.582 | 40.87 | 226.07 |
| 40.67 | 0.101 | 40.64 | 0.497 | 40.47 | 3.084 | 40.50 | 8.289  | 40.50 | 24.431 | 40.97 | 223.43 |

|       |       |       |       |       |       |       |       |       |        |       |        |
|-------|-------|-------|-------|-------|-------|-------|-------|-------|--------|-------|--------|
| 40.75 | 0.102 | 40.74 | 0.494 | 40.58 | 3.058 | 40.59 | 8.215 | 40.60 | 24.224 | 41.07 | 220.81 |
| 40.86 | 0.103 | 40.82 | 0.495 | 40.67 | 3.037 | 40.68 | 8.128 | 40.69 | 24.065 | 41.15 | 218.17 |
| 40.96 | 0.100 | 40.92 | 0.489 | 40.75 | 3.010 | 40.80 | 8.062 | 40.79 | 23.845 | 41.27 | 215.97 |
| 41.05 | 0.103 | 41.02 | 0.479 | 40.87 | 2.988 | 40.87 | 7.993 | 40.87 | 23.721 | 41.36 | 213.18 |
| 41.15 | 0.095 | 41.12 | 0.480 | 40.96 | 2.960 | 40.97 | 7.919 | 40.98 | 23.593 | 41.46 | 210.87 |
| 41.25 | 0.103 | 41.23 | 0.485 | 41.05 | 2.944 | 41.05 | 7.851 | 41.08 | 23.407 | 41.56 | 208.43 |
| 41.33 | 0.101 | 41.32 | 0.471 | 41.13 | 2.920 | 41.17 | 7.800 | 41.17 | 23.206 | 41.65 | 206.13 |
| 41.43 | 0.096 | 41.40 | 0.475 | 41.23 | 2.895 | 41.27 | 7.744 | 41.27 | 22.984 | 41.74 | 203.63 |
| 41.52 | 0.092 | 41.50 | 0.474 | 41.33 | 2.881 | 41.34 | 7.675 | 41.37 | 22.797 | 41.83 | 201.42 |
| 41.62 | 0.101 | 41.59 | 0.468 | 41.43 | 2.849 | 41.44 | 7.615 | 41.44 | 22.634 | 41.94 | 198.87 |
| 41.72 | 0.100 | 41.70 | 0.470 | 41.51 | 2.833 | 41.55 | 7.568 | 41.54 | 22.323 | 42.03 | 196.71 |
| 41.82 | 0.101 | 41.79 | 0.461 | 41.62 | 2.816 | 41.64 | 7.504 | 41.63 | 22.081 | 42.13 | 194.44 |
| 41.92 | 0.093 | 41.89 | 0.463 | 41.71 | 2.789 | 41.73 | 7.452 | 41.74 | 21.835 | 42.23 | 192.07 |
| 42.01 | 0.097 | 41.98 | 0.460 | 41.81 | 2.772 | 41.84 | 7.394 | 41.81 | 21.638 | 42.33 | 189.87 |
| 42.12 | 0.094 | 42.07 | 0.456 | 41.90 | 2.745 | 41.93 | 7.330 | 41.92 | 21.444 | 42.41 | 187.55 |
| 42.20 | 0.096 | 42.18 | 0.454 | 42.00 | 2.729 | 42.03 | 7.281 | 42.01 | 21.230 | 42.50 | 185.44 |
| 42.30 | 0.096 | 42.28 | 0.451 | 42.08 | 2.709 | 42.13 | 7.234 | 42.11 | 21.033 | 42.62 | 183.38 |
| 42.39 | 0.097 | 42.36 | 0.448 | 42.19 | 2.693 | 42.21 | 7.189 | 42.19 | 20.852 | 42.72 | 181.37 |
| 42.50 | 0.097 | 42.46 | 0.447 | 42.28 | 2.672 | 42.31 | 7.120 | 42.28 | 20.695 | 42.81 | 179.26 |
| 42.58 | 0.094 | 42.57 | 0.446 | 42.36 | 2.651 | 42.38 | 7.064 | 42.39 | 20.466 | 42.90 | 177.10 |
| 42.67 | 0.096 | 42.66 | 0.440 | 42.46 | 2.632 | 42.50 | 6.992 | 42.48 | 20.304 | 43.01 | 175.17 |
| 42.78 | 0.099 | 42.76 | 0.437 | 42.54 | 2.616 | 42.60 | 6.920 | 42.58 | 20.073 | 43.10 | 173.08 |
| 42.86 | 0.092 | 42.83 | 0.437 | 42.62 | 2.593 | 42.68 | 6.873 | 42.67 | 19.854 | 43.19 | 171.30 |
| 42.97 | 0.095 | 42.93 | 0.434 | 42.75 | 2.577 | 42.79 | 6.814 | 42.75 | 19.675 | 43.29 | 169.31 |
| 43.05 | 0.094 | 43.03 | 0.430 | 42.82 | 2.558 | 42.87 | 6.762 | 42.86 | 19.483 | 43.38 | 167.27 |
| 43.15 | 0.095 | 43.13 | 0.429 | 42.93 | 2.535 | 42.98 | 6.722 | 42.95 | 19.259 | 43.48 | 165.43 |
| 43.27 | 0.092 | 43.23 | 0.426 | 43.02 | 2.518 | 43.07 | 6.656 | 43.03 | 19.115 | 43.57 | 163.57 |
| 43.34 | 0.092 | 43.33 | 0.426 | 43.12 | 2.501 | 43.17 | 6.610 | 43.14 | 18.960 | 43.67 | 161.60 |
| 43.46 | 0.093 | 43.42 | 0.417 | 43.21 | 2.478 | 43.24 | 6.554 | 43.24 | 18.819 | 43.76 | 159.70 |
| 43.54 | 0.088 | 43.52 | 0.421 | 43.29 | 2.453 | 43.34 | 6.512 | 43.33 | 18.755 | 43.86 | 158.26 |
| 43.64 | 0.090 | 43.61 | 0.418 | 43.40 | 2.449 | 43.45 | 6.457 | 43.44 | 18.610 | 43.97 | 156.20 |
| 43.73 | 0.090 | 43.70 | 0.415 | 43.49 | 2.429 | 43.54 | 6.426 | 43.53 | 18.506 | 44.06 | 154.48 |
| 43.84 | 0.092 | 43.80 | 0.415 | 43.60 | 2.410 | 43.65 | 6.366 | 43.61 | 18.431 | 44.16 | 152.85 |
| 43.91 | 0.088 | 43.90 | 0.407 | 43.69 | 2.392 | 43.72 | 6.303 | 43.71 | 18.191 | 44.25 | 151.13 |
| 44.02 | 0.092 | 43.99 | 0.404 | 43.79 | 2.370 | 43.83 | 6.268 | 43.79 | 17.996 | 44.35 | 149.53 |
| 44.12 | 0.091 | 44.09 | 0.407 | 43.86 | 2.353 | 43.93 | 6.209 | 43.89 | 17.817 | 44.44 | 147.85 |
| 44.22 | 0.086 | 44.18 | 0.404 | 43.97 | 2.336 | 44.02 | 6.154 | 43.99 | 17.663 | 44.55 | 145.94 |
| 44.31 | 0.088 | 44.27 | 0.401 | 44.06 | 2.318 | 44.10 | 6.124 | 44.09 | 17.476 | 44.63 | 144.67 |
| 44.40 | 0.089 | 44.38 | 0.395 | 44.15 | 2.307 | 44.21 | 6.063 | 44.16 | 17.258 | 44.73 | 143.02 |
| 44.50 | 0.087 | 44.47 | 0.392 | 44.25 | 2.290 | 44.29 | 6.025 | 44.28 | 17.135 | 44.84 | 141.49 |
| 44.59 | 0.093 | 44.56 | 0.397 | 44.33 | 2.268 | 44.40 | 5.974 | 44.36 | 16.966 | 44.91 | 139.96 |
| 44.69 | 0.085 | 44.66 | 0.391 | 44.43 | 2.250 | 44.50 | 5.913 | 44.48 | 16.823 | 45.02 | 138.35 |

|       |       |       |       |       |       |       |       |       |        |       |        |
|-------|-------|-------|-------|-------|-------|-------|-------|-------|--------|-------|--------|
| 44.78 | 0.085 | 44.76 | 0.392 | 44.53 | 2.238 | 44.59 | 5.881 | 44.56 | 16.642 | 45.11 | 136.93 |
| 44.88 | 0.089 | 44.86 | 0.388 | 44.63 | 2.224 | 44.67 | 5.820 | 44.67 | 16.513 | 45.21 | 135.41 |
| 44.97 | 0.087 | 44.95 | 0.387 | 44.70 | 2.200 | 44.76 | 5.789 | 44.75 | 16.360 | 45.31 | 133.84 |
| 45.07 | 0.086 | 45.06 | 0.385 | 44.82 | 2.187 | 44.86 | 5.752 | 44.84 | 16.164 | 45.40 | 132.45 |
| 45.17 | 0.087 | 45.15 | 0.380 | 44.90 | 2.173 | 44.95 | 5.698 | 44.93 | 16.030 | 45.49 | 130.88 |
| 45.24 | 0.089 | 45.24 | 0.378 | 45.02 | 2.159 | 45.05 | 5.659 | 45.03 | 15.860 | 45.60 | 129.43 |
| 45.35 | 0.091 | 45.34 | 0.376 | 45.10 | 2.137 | 45.13 | 5.620 | 45.13 | 15.716 | 45.69 | 128.33 |
| 45.45 | 0.093 | 45.44 | 0.370 | 45.19 | 2.132 | 45.23 | 5.570 | 45.22 | 15.625 | 45.79 | 126.74 |
| 45.55 | 0.082 | 45.53 | 0.372 | 45.28 | 2.115 | 45.33 | 5.536 | 45.32 | 15.511 | 45.89 | 125.41 |
| 45.65 | 0.087 | 45.63 | 0.369 | 45.37 | 2.103 | 45.42 | 5.485 | 45.41 | 15.423 | 45.99 | 124.06 |
| 45.73 | 0.093 | 45.70 | 0.369 | 45.46 | 2.089 | 45.50 | 5.443 | 45.51 | 15.328 | 46.07 | 122.68 |
| 45.84 | 0.084 | 45.82 | 0.364 | 45.55 | 2.067 | 45.61 | 5.401 | 45.60 | 15.240 | 46.17 | 121.26 |
| 45.93 | 0.087 | 45.91 | 0.364 | 45.65 | 2.050 | 45.71 | 5.368 | 45.70 | 15.097 | 46.27 | 119.98 |
| 46.02 | 0.088 | 46.00 | 0.361 | 45.77 | 2.038 | 45.80 | 5.327 | 45.79 | 14.948 | 46.38 | 118.69 |
| 46.12 | 0.086 | 46.11 | 0.361 | 45.84 | 2.023 | 45.89 | 5.290 | 45.89 | 14.840 | 46.47 | 117.41 |
| 46.22 | 0.083 | 46.21 | 0.359 | 45.93 | 2.012 | 46.00 | 5.246 | 45.96 | 14.708 | 46.56 | 116.03 |
| 46.31 | 0.081 | 46.29 | 0.354 | 46.05 | 1.995 | 46.09 | 5.214 | 46.07 | 14.558 | 46.66 | 114.77 |
| 46.41 | 0.088 | 46.38 | 0.352 | 46.14 | 1.977 | 46.18 | 5.164 | 46.16 | 14.420 | 46.78 | 113.43 |
| 46.49 | 0.082 | 46.49 | 0.356 | 46.22 | 1.966 | 46.27 | 5.125 | 46.26 | 14.288 | 46.87 | 112.50 |
| 46.60 | 0.086 | 46.58 | 0.351 | 46.32 | 1.951 | 46.36 | 5.087 | 46.35 | 14.146 | 46.96 | 111.41 |
| 46.68 | 0.084 | 46.67 | 0.345 | 46.42 | 1.936 | 46.45 | 5.046 | 46.45 | 13.981 | 47.04 | 110.05 |
| 46.78 | 0.086 | 46.77 | 0.346 | 46.51 | 1.922 | 46.54 | 5.013 | 46.54 | 13.895 | 47.16 | 108.81 |
| 46.89 | 0.083 | 46.87 | 0.349 | 46.60 | 1.914 | 46.65 | 4.975 | 46.65 | 13.761 | 47.24 | 107.53 |
| 46.98 | 0.077 | 46.96 | 0.345 | 46.70 | 1.897 | 46.73 | 4.936 | 46.73 | 13.602 | 47.35 | 106.61 |
| 47.07 | 0.084 | 47.06 | 0.339 | 46.80 | 1.876 | 46.83 | 4.896 | 46.83 | 13.476 | 47.44 | 105.19 |
| 47.17 | 0.078 | 47.16 | 0.336 | 46.88 | 1.874 | 46.92 | 4.868 | 46.91 | 13.355 | 47.54 | 104.13 |
| 47.27 | 0.082 | 47.26 | 0.338 | 46.98 | 1.860 | 47.04 | 4.824 | 47.02 | 13.240 | 47.63 | 103.04 |
| 47.37 | 0.080 | 47.36 | 0.337 | 47.07 | 1.845 | 47.11 | 4.797 | 47.10 | 13.150 | 47.72 | 102.03 |
| 47.46 | 0.077 | 47.45 | 0.334 | 47.17 | 1.829 | 47.21 | 4.764 | 47.21 | 13.086 | 47.83 | 101.01 |
| 47.55 | 0.083 | 47.54 | 0.327 | 47.29 | 1.822 | 47.30 | 4.709 | 47.31 | 12.995 | 47.91 | 99.92  |
| 47.65 | 0.077 | 47.64 | 0.333 | 47.35 | 1.802 | 47.40 | 4.695 | 47.40 | 12.882 | 48.01 | 98.88  |
| 47.74 | 0.083 | 47.74 | 0.324 | 47.47 | 1.794 | 47.48 | 4.653 | 47.47 | 12.801 | 48.12 | 97.60  |
| 47.84 | 0.081 | 47.81 | 0.328 | 47.57 | 1.781 | 47.57 | 4.614 | 47.59 | 12.706 | 48.21 | 96.63  |
| 47.94 | 0.081 | 47.91 | 0.323 | 47.65 | 1.772 | 47.68 | 4.573 | 47.69 | 12.607 | 48.31 | 95.50  |
| 48.03 | 0.076 | 48.00 | 0.325 | 47.73 | 1.763 | 47.77 | 4.534 | 47.77 | 12.497 | 48.39 | 94.59  |
| 48.14 | 0.077 | 48.11 | 0.322 | 47.82 | 1.749 | 47.87 | 4.503 | 47.88 | 12.396 | 48.49 | 93.38  |
| 48.23 | 0.078 | 48.20 | 0.322 | 47.93 | 1.738 | 47.96 | 4.479 | 47.97 | 12.261 | 48.59 | 92.51  |
| 48.32 | 0.080 | 48.28 | 0.317 | 48.01 | 1.721 | 48.05 | 4.442 | 48.06 | 12.108 | 48.70 | 91.61  |
| 48.41 | 0.081 | 48.39 | 0.313 | 48.11 | 1.709 | 48.14 | 4.405 | 48.17 | 11.999 | 48.79 | 90.73  |
| 48.50 | 0.079 | 48.48 | 0.319 | 48.20 | 1.695 | 48.24 | 4.377 | 48.24 | 11.899 | 48.88 | 89.76  |
| 48.60 | 0.075 | 48.58 | 0.318 | 48.29 | 1.687 | 48.34 | 4.341 | 48.35 | 11.795 | 48.98 | 88.67  |
| 48.70 | 0.081 | 48.67 | 0.308 | 48.39 | 1.668 | 48.43 | 4.311 | 48.44 | 11.681 | 49.07 | 87.94  |

|       |       |       |       |       |       |       |       |       |        |       |       |
|-------|-------|-------|-------|-------|-------|-------|-------|-------|--------|-------|-------|
| 48.78 | 0.077 | 48.78 | 0.308 | 48.48 | 1.655 | 48.53 | 4.280 | 48.54 | 11.573 | 49.18 | 86.77 |
| 48.88 | 0.080 | 48.87 | 0.307 | 48.57 | 1.651 | 48.61 | 4.245 | 48.64 | 11.471 | 49.27 | 85.99 |
| 48.98 | 0.080 | 48.97 | 0.311 | 48.69 | 1.643 | 48.71 | 4.216 | 48.71 | 11.397 | 49.36 | 84.79 |
| 49.08 | 0.073 | 49.06 | 0.311 | 48.75 | 1.628 | 48.80 | 4.178 | 48.81 | 11.301 | 49.46 | 84.39 |
| 49.19 | 0.078 | 49.16 | 0.301 | 48.86 | 1.617 | 48.89 | 4.161 | 48.90 | 11.249 | 49.56 | 83.32 |
| 49.28 | 0.075 | 49.25 | 0.305 | 48.95 | 1.607 | 49.00 | 4.134 | 48.98 | 11.182 | 49.66 | 82.15 |
| 49.37 | 0.078 | 49.33 | 0.301 | 49.06 | 1.594 | 49.08 | 4.103 | 49.09 | 11.084 | 49.76 | 81.58 |
| 49.47 | 0.076 | 49.44 | 0.303 | 49.13 | 1.580 | 49.18 | 4.072 | 49.19 | 10.976 | 49.85 | 80.70 |
| 49.56 | 0.076 | 49.55 | 0.296 | 49.24 | 1.571 | 49.26 | 4.042 | 49.29 | 10.875 | 49.94 | 79.87 |
| 49.65 | 0.083 | 49.62 | 0.297 | 49.35 | 1.560 | 49.37 | 4.018 | 49.37 | 10.823 | 50.03 | 78.82 |
| 49.76 | 0.075 | 49.72 | 0.302 | 49.43 | 1.550 | 49.44 | 3.978 | 49.47 | 10.744 | 50.14 | 78.12 |
| 49.85 | 0.067 | 49.84 | 0.296 | 49.53 | 1.544 | 49.55 | 3.954 | 49.56 | 10.629 | 50.21 | 77.28 |
| 49.95 | 0.074 | 49.92 | 0.296 | 49.63 | 1.529 | 49.63 | 3.922 | 49.66 | 10.552 | 50.34 | 76.83 |
| 50.05 | 0.076 | 50.00 | 0.288 | 49.70 | 1.518 | 49.73 | 3.884 | 49.76 | 10.469 | 50.42 | 75.83 |
| 50.13 | 0.075 | 50.11 | 0.292 | 49.81 | 1.509 | 49.83 | 3.855 | 49.83 | 10.337 | 50.53 | 74.94 |
| 50.22 | 0.082 | 50.20 | 0.286 | 49.91 | 1.502 | 49.93 | 3.834 | 49.93 | 10.258 | 50.61 | 74.32 |
| 50.33 | 0.082 | 50.28 | 0.286 | 50.01 | 1.487 | 50.03 | 3.803 | 50.04 | 10.144 | 50.72 | 73.60 |
| 50.41 | 0.072 | 50.41 | 0.285 | 50.10 | 1.477 | 50.12 | 3.770 | 50.12 | 10.062 | 50.82 | 72.68 |
| 50.51 | 0.078 | 50.48 | 0.283 | 50.19 | 1.468 | 50.22 | 3.752 | 50.23 | 9.969  | 50.92 | 72.04 |
| 50.59 | 0.076 | 50.59 | 0.288 | 50.28 | 1.458 | 50.31 | 3.722 | 50.31 | 9.914  | 51.02 | 71.31 |
| 50.70 | 0.074 | 50.68 | 0.284 | 50.38 | 1.452 | 50.40 | 3.685 | 50.41 | 9.814  | 51.10 | 70.55 |
| 50.79 | 0.078 | 50.78 | 0.276 | 50.46 | 1.439 | 50.51 | 3.664 | 50.51 | 9.729  | 51.21 | 69.82 |
| 50.88 | 0.075 | 50.87 | 0.280 | 50.56 | 1.432 | 50.59 | 3.641 | 50.62 | 9.668  | 51.29 | 69.09 |
| 50.98 | 0.069 | 50.97 | 0.274 | 50.66 | 1.422 | 50.69 | 3.612 | 50.69 | 9.602  | 51.39 | 68.29 |
| 51.09 | 0.077 | 51.05 | 0.273 | 50.74 | 1.409 | 50.78 | 3.584 | 50.78 | 9.532  | 51.50 | 67.47 |
| 51.18 | 0.070 | 51.15 | 0.277 | 50.84 | 1.406 | 50.87 | 3.563 | 50.89 | 9.460  | 51.59 | 67.05 |
| 51.27 | 0.075 | 51.25 | 0.276 | 50.94 | 1.387 | 50.97 | 3.530 | 50.98 | 9.363  | 51.68 | 66.16 |
| 51.38 | 0.070 | 51.34 | 0.270 | 51.02 | 1.379 | 51.06 | 3.503 | 51.09 | 9.305  | 51.79 | 65.62 |
| 51.48 | 0.076 | 51.44 | 0.270 | 51.12 | 1.375 | 51.16 | 3.491 | 51.17 | 9.265  | 51.89 | 65.10 |
| 51.58 | 0.073 | 51.53 | 0.269 | 51.21 | 1.364 | 51.26 | 3.455 | 51.25 | 9.180  | 51.97 | 64.19 |
| 51.67 | 0.073 | 51.63 | 0.269 | 51.30 | 1.357 | 51.33 | 3.437 | 51.38 | 9.080  | 52.07 | 63.57 |
| 51.76 | 0.076 | 51.73 | 0.267 | 51.39 | 1.347 | 51.43 | 3.402 | 51.46 | 8.982  | 52.17 | 62.84 |
| 51.87 | 0.075 | 51.82 | 0.263 | 51.51 | 1.338 | 51.53 | 3.385 | 51.56 | 8.911  | 52.27 | 62.28 |
| 51.96 | 0.077 | 51.91 | 0.260 | 51.59 | 1.325 | 51.63 | 3.363 | 51.65 | 8.818  | 52.35 | 61.58 |
| 52.04 | 0.067 | 52.01 | 0.263 | 51.68 | 1.315 | 51.72 | 3.328 | 51.74 | 8.753  | 52.46 | 61.24 |
| 52.13 | 0.075 | 52.11 | 0.265 | 51.77 | 1.315 | 51.80 | 3.307 | 51.83 | 8.691  | 52.56 | 60.30 |
| 52.24 | 0.071 | 52.20 | 0.259 | 51.87 | 1.304 | 51.89 | 3.293 | 51.93 | 8.614  | 52.66 | 59.75 |
| 52.33 | 0.073 | 52.30 | 0.257 | 51.97 | 1.291 | 52.00 | 3.261 | 52.03 | 8.540  | 52.75 | 59.09 |
| 52.44 | 0.071 | 52.40 | 0.256 | 52.08 | 1.282 | 52.09 | 3.242 | 52.12 | 8.472  | 52.85 | 58.53 |
| 52.52 | 0.067 | 52.51 | 0.255 | 52.14 | 1.275 | 52.20 | 3.218 | 52.22 | 8.449  | 52.96 | 58.07 |
| 52.62 | 0.070 | 52.59 | 0.253 | 52.25 | 1.269 | 52.31 | 3.189 | 52.30 | 8.346  | 53.04 | 57.23 |
| 52.72 | 0.071 | 52.68 | 0.251 | 52.35 | 1.259 | 52.39 | 3.161 | 52.39 | 8.291  | 53.15 | 56.87 |

|       |       |       |       |       |       |       |       |       |       |       |       |
|-------|-------|-------|-------|-------|-------|-------|-------|-------|-------|-------|-------|
| 52.83 | 0.074 | 52.79 | 0.253 | 52.45 | 1.252 | 52.49 | 3.150 | 52.49 | 8.239 | 53.23 | 56.17 |
| 52.91 | 0.072 | 52.88 | 0.253 | 52.55 | 1.247 | 52.58 | 3.126 | 52.60 | 8.189 | 53.33 | 55.63 |
| 53.00 | 0.070 | 52.98 | 0.253 | 52.65 | 1.234 | 52.69 | 3.096 | 52.68 | 8.130 | 53.42 | 55.09 |
| 53.10 | 0.066 | 53.07 | 0.251 | 52.73 | 1.225 | 52.76 | 3.081 | 52.78 | 8.060 | 53.52 | 54.59 |
| 53.20 | 0.065 | 53.15 | 0.242 | 52.83 | 1.220 | 52.87 | 3.056 | 52.87 | 7.985 | 53.61 | 53.80 |
| 53.29 | 0.070 | 53.26 | 0.247 | 52.92 | 1.212 | 52.97 | 3.036 | 52.97 | 7.930 | 53.70 | 53.28 |
| 53.40 | 0.076 | 53.34 | 0.244 | 53.01 | 1.204 | 53.06 | 3.007 | 53.06 | 7.837 | 53.80 | 52.85 |
| 53.48 | 0.068 | 53.43 | 0.240 | 53.12 | 1.193 | 53.15 | 2.990 | 53.17 | 7.791 | 53.91 | 52.18 |
| 53.57 | 0.069 | 53.54 | 0.244 | 53.21 | 1.190 | 53.23 | 2.979 | 53.25 | 7.709 | 53.99 | 51.72 |
| 53.68 | 0.069 | 53.63 | 0.239 | 53.32 | 1.176 | 53.35 | 2.947 | 53.36 | 7.643 | 54.11 | 51.40 |
| 53.77 | 0.070 | 53.72 | 0.243 | 53.40 | 1.172 | 53.43 | 2.933 | 53.44 | 7.594 | 54.19 | 50.93 |
| 53.87 | 0.070 | 53.81 | 0.239 | 53.48 | 1.166 | 53.51 | 2.918 | 53.54 | 7.551 | 54.28 | 50.26 |
| 53.97 | 0.065 | 53.91 | 0.234 | 53.59 | 1.156 | 53.61 | 2.887 | 53.64 | 7.491 | 54.40 | 49.68 |
| 54.05 | 0.075 | 54.01 | 0.239 | 53.67 | 1.149 | 53.70 | 2.872 | 53.72 | 7.442 | 54.48 | 49.23 |
| 54.16 | 0.070 | 54.10 | 0.237 | 53.79 | 1.138 | 53.79 | 2.848 | 53.81 | 7.385 | 54.58 | 48.78 |
| 54.26 | 0.067 | 54.20 | 0.238 | 53.88 | 1.132 | 53.89 | 2.836 | 53.90 | 7.332 | 54.70 | 48.30 |
| 54.35 | 0.070 | 54.30 | 0.235 | 53.98 | 1.126 | 53.99 | 2.819 | 54.01 | 7.257 | 54.78 | 47.87 |
| 54.44 | 0.074 | 54.40 | 0.231 | 54.08 | 1.120 | 54.09 | 2.790 | 54.08 | 7.202 | 54.86 | 47.39 |
| 54.53 | 0.063 | 54.48 | 0.231 | 54.16 | 1.113 | 54.19 | 2.778 | 54.19 | 7.165 | 54.98 | 47.09 |
| 54.64 | 0.069 | 54.58 | 0.232 | 54.27 | 1.106 | 54.28 | 2.749 | 54.29 | 7.078 | 55.07 | 46.62 |
| 54.74 | 0.074 | 54.67 | 0.234 | 54.36 | 1.093 | 54.37 | 2.734 | 54.39 | 7.021 | 55.16 | 45.98 |
| 54.83 | 0.066 | 54.78 | 0.227 | 54.45 | 1.092 | 54.46 | 2.716 | 54.50 | 6.972 | 55.26 | 45.58 |
| 54.92 | 0.067 | 54.86 | 0.225 | 54.55 | 1.088 | 54.55 | 2.689 | 54.57 | 6.895 | 55.33 | 45.16 |
| 55.01 | 0.062 | 54.96 | 0.225 | 54.65 | 1.075 | 54.65 | 2.673 | 54.68 | 6.854 | 55.45 | 44.73 |
| 55.11 | 0.071 | 55.05 | 0.220 | 54.75 | 1.069 | 54.74 | 2.653 | 54.77 | 6.801 | 55.54 | 44.37 |
| 55.21 | 0.063 | 55.14 | 0.224 | 54.83 | 1.063 | 54.84 | 2.638 | 54.85 | 6.758 | 55.64 | 43.87 |
| 55.31 | 0.069 | 55.24 | 0.227 | 54.92 | 1.053 | 54.92 | 2.619 | 54.96 | 6.716 | 55.73 | 43.40 |
| 55.39 | 0.071 | 55.35 | 0.219 | 55.01 | 1.050 | 55.02 | 2.597 | 55.06 | 6.653 | 55.83 | 43.07 |
| 55.48 | 0.065 | 55.43 | 0.222 | 55.10 | 1.041 | 55.12 | 2.585 | 55.14 | 6.620 | 55.93 | 42.56 |
| 55.58 | 0.069 | 55.53 | 0.220 | 55.20 | 1.040 | 55.20 | 2.566 | 55.23 | 6.559 | 56.04 | 42.36 |
| 55.68 | 0.071 | 55.62 | 0.220 | 55.30 | 1.028 | 55.31 | 2.543 | 55.33 | 6.513 | 56.12 | 41.76 |
| 55.77 | 0.072 | 55.73 | 0.222 | 55.38 | 1.025 | 55.39 | 2.532 | 55.43 | 6.455 | 56.23 | 41.43 |
| 55.87 | 0.067 | 55.82 | 0.214 | 55.49 | 1.015 | 55.51 | 2.508 | 55.51 | 6.404 | 56.32 | 41.08 |
| 55.98 | 0.071 | 55.92 | 0.214 | 55.57 | 1.016 | 55.60 | 2.499 | 55.61 | 6.350 | 56.42 | 40.72 |
| 56.07 | 0.069 | 56.02 | 0.216 | 55.66 | 1.003 | 55.69 | 2.476 | 55.70 | 6.305 | 56.51 | 40.14 |
| 56.17 | 0.064 | 56.10 | 0.213 | 55.77 | 0.996 | 55.77 | 2.466 | 55.81 | 6.253 | 56.61 | 39.85 |
| 56.25 | 0.065 | 56.19 | 0.214 | 55.85 | 0.995 | 55.88 | 2.447 | 55.90 | 6.205 | 56.70 | 39.64 |
| 56.33 | 0.064 | 56.30 | 0.210 | 55.94 | 0.991 | 55.97 | 2.430 | 56.00 | 6.164 | 56.79 | 39.05 |
| 56.43 | 0.063 | 56.38 | 0.208 | 56.04 | 0.981 | 56.06 | 2.416 | 56.10 | 6.106 | 56.89 | 38.64 |
| 56.53 | 0.068 | 56.49 | 0.209 | 56.14 | 0.975 | 56.15 | 2.397 | 56.18 | 6.070 | 56.97 | 38.44 |
| 56.63 | 0.067 | 56.58 | 0.209 | 56.24 | 0.965 | 56.24 | 2.379 | 56.28 | 6.010 | 57.08 | 38.11 |
| 56.73 | 0.062 | 56.67 | 0.209 | 56.33 | 0.962 | 56.34 | 2.360 | 56.35 | 5.988 | 57.17 | 37.76 |



|       |       |       |       |       |       |       |       |       |       |       |       |
|-------|-------|-------|-------|-------|-------|-------|-------|-------|-------|-------|-------|
| 56.82 | 0.062 | 56.79 | 0.205 | 56.42 | 0.953 | 56.42 | 2.349 | 56.46 | 5.944 | 57.26 | 37.31 |
| 56.91 | 0.065 | 56.88 | 0.205 | 56.52 | 0.950 | 56.53 | 2.330 | 56.55 | 5.908 | 57.36 | 37.15 |
| 57.01 | 0.068 | 56.95 | 0.209 | 56.62 | 0.938 | 56.63 | 2.313 | 56.63 | 5.863 | 57.47 | 36.75 |
| 57.09 | 0.069 | 57.06 | 0.201 | 56.73 | 0.937 | 56.70 | 2.292 | 56.73 | 5.817 | 57.56 | 36.35 |
| 57.20 | 0.064 | 57.15 | 0.204 | 56.82 | 0.931 | 56.82 | 2.285 | 56.83 | 5.768 | 57.65 | 36.01 |
| 57.30 | 0.060 | 57.24 | 0.200 | 56.91 | 0.928 | 56.90 | 2.267 | 56.91 | 5.734 | 57.75 | 35.60 |
| 57.40 | 0.069 | 57.35 | 0.206 | 57.00 | 0.919 | 57.01 | 2.254 | 57.01 | 5.686 | 57.86 | 35.32 |
| 57.49 | 0.068 | 57.44 | 0.203 | 57.09 | 0.912 | 57.10 | 2.239 | 57.09 | 5.628 | 57.95 | 34.96 |
| 57.57 | 0.063 | 57.54 | 0.198 | 57.18 | 0.909 | 57.20 | 2.224 | 57.21 | 5.592 | 58.04 | 34.67 |
| 57.68 | 0.067 | 57.63 | 0.198 | 57.29 | 0.902 | 57.29 | 2.206 | 57.29 | 5.546 | 58.15 | 34.52 |
| 57.76 | 0.060 | 57.72 | 0.200 | 57.39 | 0.898 | 57.38 | 2.190 | 57.40 | 5.513 | 58.22 | 34.13 |
| 57.86 | 0.062 | 57.83 | 0.200 | 57.48 | 0.891 | 57.49 | 2.171 | 57.48 | 5.465 | 58.32 | 34.00 |
| 57.96 | 0.059 | 57.92 | 0.201 | 57.55 | 0.885 | 57.57 | 2.158 | 57.58 | 5.422 | 58.42 | 33.38 |
| 58.06 | 0.064 | 58.02 | 0.196 | 57.65 | 0.878 | 57.67 | 2.150 | 57.69 | 5.377 | 58.52 | 33.11 |
| 58.15 | 0.063 | 58.12 | 0.194 | 57.79 | 0.875 | 57.76 | 2.132 | 57.79 | 5.340 | 58.62 | 32.87 |
| 58.25 | 0.063 | 58.21 | 0.195 | 57.84 | 0.867 | 57.86 | 2.115 | 57.88 | 5.299 | 58.71 | 32.53 |
| 58.35 | 0.061 | 58.31 | 0.196 | 57.94 | 0.865 | 57.94 | 2.096 | 57.98 | 5.272 | 58.82 | 32.35 |
| 58.44 | 0.067 | 58.39 | 0.188 | 58.04 | 0.863 | 58.04 | 2.089 | 58.06 | 5.229 | 58.89 | 31.98 |
| 58.53 | 0.062 | 58.50 | 0.188 | 58.13 | 0.853 | 58.15 | 2.073 | 58.15 | 5.183 | 59.00 | 31.61 |
| 58.64 | 0.067 | 58.59 | 0.190 | 58.24 | 0.847 | 58.23 | 2.057 | 58.24 | 5.153 | 59.08 | 31.39 |
| 58.73 | 0.062 | 58.69 | 0.191 | 58.33 | 0.842 | 58.35 | 2.049 | 58.35 | 5.107 | 59.19 | 31.05 |
| 58.82 | 0.061 | 58.78 | 0.191 | 58.44 | 0.842 | 58.43 | 2.031 | 58.45 | 5.073 | 59.27 | 30.89 |
| 58.93 | 0.057 | 58.86 | 0.189 | 58.50 | 0.834 | 58.52 | 2.016 | 58.53 | 5.028 | 59.40 | 30.47 |
| 59.03 | 0.065 | 58.98 | 0.190 | 58.61 | 0.826 | 58.62 | 2.003 | 58.66 | 4.986 | 59.48 | 30.24 |
| 59.12 | 0.069 | 59.07 | 0.188 | 58.72 | 0.823 | 58.71 | 1.991 | 58.72 | 4.944 | 59.59 | 29.93 |
| 59.20 | 0.068 | 59.17 | 0.189 | 58.80 | 0.818 | 58.81 | 1.977 | 58.82 | 4.916 | 59.66 | 29.76 |
| 59.31 | 0.059 | 59.25 | 0.183 | 58.90 | 0.811 | 58.89 | 1.962 | 58.90 | 4.890 | 59.77 | 29.42 |
| 59.41 | 0.063 | 59.36 | 0.183 | 58.99 | 0.810 | 58.98 | 1.949 | 59.02 | 4.844 | 59.87 | 29.14 |
| 59.49 | 0.067 | 59.44 | 0.184 | 59.09 | 0.805 | 59.09 | 1.943 | 59.11 | 4.819 | 59.97 | 28.90 |
| 59.60 | 0.062 | 59.56 | 0.186 | 59.19 | 0.802 | 59.20 | 1.922 | 59.19 | 4.789 | 60.05 | 28.62 |
| 59.69 | 0.059 | 59.65 | 0.188 | 59.28 | 0.792 | 59.29 | 1.909 | 59.29 | 4.755 | 60.16 | 28.31 |
| 59.79 | 0.063 | 59.73 | 0.182 | 59.37 | 0.787 | 59.38 | 1.901 | 59.37 | 4.704 | 60.25 | 27.97 |
| 59.88 | 0.059 | 59.83 | 0.184 | 59.47 | 0.783 | 59.48 | 1.886 | 59.47 | 4.673 | 60.35 | 27.77 |
| 59.97 | 0.060 | 59.92 | 0.186 | 59.56 | 0.780 | 59.56 | 1.880 | 59.57 | 4.646 | 60.46 | 27.54 |
| 60.05 | 0.059 | 60.02 | 0.181 | 59.65 | 0.775 | 59.67 | 1.867 | 59.67 | 4.612 | 60.54 | 27.23 |
| 60.16 | 0.063 | 60.11 | 0.179 | 59.76 | 0.771 | 59.76 | 1.853 | 59.76 | 4.574 | 60.63 | 27.22 |
| 60.26 | 0.069 | 60.21 | 0.177 | 59.84 | 0.763 | 59.85 | 1.837 | 59.86 | 4.545 | 60.73 | 26.84 |
| 60.36 | 0.062 | 60.31 | 0.177 | 59.95 | 0.761 | 59.95 | 1.828 | 59.95 | 4.502 | 60.85 | 26.67 |
| 60.46 | 0.059 | 60.38 | 0.177 | 60.02 | 0.759 | 60.06 | 1.810 | 60.05 | 4.473 | 60.93 | 26.33 |
| 60.54 | 0.060 | 60.49 | 0.178 | 60.12 | 0.755 | 60.14 | 1.805 | 60.13 | 4.434 | 61.02 | 26.14 |
| 60.65 | 0.057 | 60.59 | 0.176 | 60.21 | 0.747 | 60.24 | 1.786 | 60.23 | 4.410 | 61.13 | 25.92 |
| 60.74 | 0.058 | 60.68 | 0.176 | 60.30 | 0.743 | 60.33 | 1.777 | 60.34 | 4.379 | 61.24 | 25.65 |

|       |       |       |       |       |       |       |       |       |       |       |       |
|-------|-------|-------|-------|-------|-------|-------|-------|-------|-------|-------|-------|
| 60.83 | 0.057 | 60.79 | 0.172 | 60.40 | 0.738 | 60.43 | 1.765 | 60.43 | 4.348 | 61.33 | 25.34 |
| 60.94 | 0.065 | 60.88 | 0.172 | 60.49 | 0.732 | 60.53 | 1.757 | 60.51 | 4.315 | 61.41 | 25.14 |
| 61.03 | 0.057 | 60.97 | 0.172 | 60.60 | 0.729 | 60.63 | 1.742 | 60.63 | 4.283 | 61.51 | 24.95 |
| 61.11 | 0.051 | 61.05 | 0.174 | 60.69 | 0.725 | 60.70 | 1.732 | 60.72 | 4.243 | 61.59 | 24.77 |
| 61.21 | 0.058 | 61.16 | 0.170 | 60.78 | 0.720 | 60.81 | 1.720 | 60.81 | 4.208 | 61.69 | 24.46 |
| 61.31 | 0.057 | 61.26 | 0.168 | 60.87 | 0.716 | 60.91 | 1.702 | 60.90 | 4.191 | 61.79 | 24.32 |
| 61.42 | 0.063 | 61.35 | 0.170 | 61.00 | 0.713 | 61.01 | 1.707 | 60.97 | 4.158 | 61.88 | 24.06 |
| 61.50 | 0.060 | 61.44 | 0.167 | 61.08 | 0.711 | 61.08 | 1.688 | 61.09 | 4.131 | 61.99 | 23.78 |
| 61.60 | 0.065 | 61.54 | 0.165 | 61.18 | 0.707 | 61.19 | 1.672 | 61.15 | 4.105 | 62.07 | 23.55 |
| 61.72 | 0.060 | 61.63 | 0.164 | 61.28 | 0.703 | 61.28 | 1.662 | 61.28 | 4.072 | 62.18 | 23.41 |
| 61.79 | 0.057 | 61.74 | 0.167 | 61.36 | 0.695 | 61.38 | 1.654 | 61.36 | 4.044 | 62.27 | 23.15 |
| 61.89 | 0.058 | 61.83 | 0.164 | 61.44 | 0.695 | 61.47 | 1.644 | 61.46 | 4.007 | 62.36 | 23.11 |
| 61.98 | 0.055 | 61.92 | 0.167 | 61.54 | 0.689 | 61.56 | 1.640 | 61.54 | 3.986 | 62.46 | 22.65 |
| 62.10 | 0.062 | 62.02 | 0.162 | 61.65 | 0.683 | 61.66 | 1.621 | 61.65 | 3.964 | 62.56 | 22.59 |
| 62.17 | 0.056 | 62.12 | 0.166 | 61.73 | 0.682 | 61.74 | 1.609 | 61.75 | 3.928 | 62.66 | 22.40 |
| 62.28 | 0.059 | 62.21 | 0.165 | 61.82 | 0.677 | 61.84 | 1.600 | 61.83 | 3.903 | 62.74 | 22.17 |
| 62.36 | 0.062 | 62.32 | 0.164 | 61.92 | 0.670 | 61.95 | 1.591 | 61.93 | 3.866 | 62.86 | 22.06 |
| 62.46 | 0.055 | 62.40 | 0.161 | 62.02 | 0.669 | 62.04 | 1.583 | 62.01 | 3.846 | 62.96 | 21.80 |
| 62.56 | 0.057 | 62.51 | 0.164 | 62.11 | 0.663 | 62.13 | 1.563 | 62.12 | 3.825 | 63.05 | 21.68 |
| 62.64 | 0.062 | 62.60 | 0.160 | 62.21 | 0.662 | 62.22 | 1.563 | 62.21 | 3.793 | 63.15 | 21.34 |
| 62.74 | 0.050 | 62.70 | 0.162 | 62.31 | 0.655 | 62.32 | 1.550 | 62.30 | 3.759 | 63.24 | 21.28 |
| 62.85 | 0.053 | 62.79 | 0.159 | 62.40 | 0.653 | 62.41 | 1.538 | 62.39 | 3.741 | 63.33 | 21.00 |
| 62.93 | 0.060 | 62.89 | 0.159 | 62.49 | 0.650 | 62.50 | 1.530 | 62.48 | 3.716 | 63.43 | 20.78 |
| 63.04 | 0.060 | 62.98 | 0.159 | 62.59 | 0.646 | 62.62 | 1.518 | 62.61 | 3.690 | 63.52 | 20.69 |
| 63.12 | 0.061 | 63.08 | 0.155 | 62.68 | 0.645 | 62.70 | 1.513 | 62.68 | 3.666 | 63.62 | 20.50 |
| 63.22 | 0.057 | 63.16 | 0.158 | 62.77 | 0.644 | 62.81 | 1.503 | 62.78 | 3.628 | 63.73 | 20.26 |
| 63.30 | 0.056 | 63.27 | 0.163 | 62.87 | 0.635 | 62.89 | 1.491 | 62.88 | 3.608 | 63.80 | 20.19 |
| 63.42 | 0.061 | 63.36 | 0.154 | 62.96 | 0.633 | 62.99 | 1.481 | 62.96 | 3.586 | 63.93 | 20.02 |
| 63.51 | 0.062 | 63.47 | 0.151 | 63.07 | 0.628 | 63.08 | 1.475 | 63.05 | 3.562 | 64.00 | 19.74 |
| 63.61 | 0.061 | 63.55 | 0.156 | 63.15 | 0.626 | 63.16 | 1.463 | 63.15 | 3.539 | 64.12 | 19.57 |
| 63.71 | 0.060 | 63.64 | 0.158 | 63.26 | 0.620 | 63.26 | 1.449 | 63.24 | 3.506 | 64.20 | 19.45 |
| 63.81 | 0.050 | 63.75 | 0.151 | 63.32 | 0.618 | 63.36 | 1.441 | 63.34 | 3.488 | 64.31 | 19.32 |
| 63.89 | 0.066 | 63.83 | 0.153 | 63.44 | 0.612 | 63.45 | 1.437 | 63.44 | 3.455 | 64.40 | 19.09 |
| 63.99 | 0.055 | 63.94 | 0.157 | 63.54 | 0.611 | 63.56 | 1.428 | 63.54 | 3.436 | 64.49 | 18.90 |
| 64.08 | 0.051 | 64.04 | 0.147 | 63.62 | 0.607 | 63.65 | 1.420 | 63.60 | 3.418 | 64.59 | 18.74 |
| 64.17 | 0.052 | 64.14 | 0.155 | 63.73 | 0.605 | 63.75 | 1.408 | 63.74 | 3.391 | 64.69 | 18.66 |
| 64.26 | 0.056 | 64.24 | 0.152 | 63.81 | 0.604 | 63.85 | 1.400 | 63.82 | 3.360 | 64.79 | 18.53 |
| 64.37 | 0.059 | 64.32 | 0.153 | 63.91 | 0.598 | 63.94 | 1.388 | 63.91 | 3.349 | 64.87 | 18.27 |
| 64.45 | 0.055 | 64.43 | 0.149 | 64.01 | 0.596 | 64.03 | 1.386 | 64.01 | 3.323 | 64.95 | 18.16 |
| 64.55 | 0.057 | 64.51 | 0.148 | 64.10 | 0.590 | 64.14 | 1.368 | 64.11 | 3.295 | 65.08 | 17.98 |
| 64.66 | 0.062 | 64.61 | 0.151 | 64.20 | 0.588 | 64.22 | 1.367 | 64.19 | 3.273 | 65.16 | 17.82 |
| 64.77 | 0.059 | 64.71 | 0.146 | 64.30 | 0.585 | 64.31 | 1.361 | 64.28 | 3.252 | 65.26 | 17.71 |

|       |       |       |       |       |       |       |       |       |       |       |       |
|-------|-------|-------|-------|-------|-------|-------|-------|-------|-------|-------|-------|
| 64.85 | 0.054 | 64.79 | 0.145 | 64.38 | 0.583 | 64.42 | 1.348 | 64.38 | 3.230 | 65.36 | 17.47 |
| 64.96 | 0.053 | 64.90 | 0.147 | 64.50 | 0.578 | 64.49 | 1.339 | 64.47 | 3.213 | 65.45 | 17.32 |
| 65.05 | 0.062 | 64.98 | 0.149 | 64.58 | 0.574 | 64.60 | 1.331 | 64.56 | 3.188 | 65.55 | 17.20 |
| 65.15 | 0.061 | 65.09 | 0.150 | 64.68 | 0.572 | 64.68 | 1.324 | 64.67 | 3.163 | 65.64 | 17.04 |
| 65.23 | 0.060 | 65.18 | 0.142 | 64.78 | 0.568 | 64.79 | 1.317 | 64.76 | 3.142 | 65.74 | 16.95 |
| 65.34 | 0.054 | 65.29 | 0.146 | 64.86 | 0.564 | 64.87 | 1.304 | 64.85 | 3.129 | 65.83 | 16.85 |
| 65.44 | 0.057 | 65.38 | 0.146 | 64.97 | 0.557 | 64.96 | 1.300 | 64.96 | 3.097 | 65.93 | 16.65 |
| 65.53 | 0.050 | 65.49 | 0.145 | 65.06 | 0.558 | 65.07 | 1.294 | 65.05 | 3.073 | 66.03 | 16.47 |
| 65.61 | 0.060 | 65.58 | 0.148 | 65.16 | 0.557 | 65.15 | 1.281 | 65.13 | 3.052 | 66.12 | 16.37 |
| 65.72 | 0.064 | 65.67 | 0.144 | 65.24 | 0.551 | 65.26 | 1.274 | 65.23 | 3.034 | 66.22 | 16.33 |
| 65.80 | 0.057 | 65.76 | 0.143 | 65.34 | 0.551 | 65.34 | 1.269 | 65.32 | 3.018 | 66.30 | 16.10 |
| 65.91 | 0.052 | 65.86 | 0.142 | 65.43 | 0.547 | 65.44 | 1.259 | 65.42 | 2.989 | 66.43 | 15.90 |
| 66.00 | 0.051 | 65.95 | 0.140 | 65.54 | 0.543 | 65.52 | 1.252 | 65.51 | 2.973 | 66.51 | 15.86 |
| 66.12 | 0.049 | 66.05 | 0.143 | 65.61 | 0.542 | 65.61 | 1.246 | 65.61 | 2.955 | 66.60 | 15.73 |
| 66.19 | 0.055 | 66.16 | 0.140 | 65.71 | 0.536 | 65.73 | 1.237 | 65.70 | 2.929 | 66.70 | 15.57 |
| 66.29 | 0.051 | 66.25 | 0.137 | 65.82 | 0.532 | 65.82 | 1.232 | 65.80 | 2.902 | 66.80 | 15.45 |
| 66.38 | 0.056 | 66.33 | 0.142 | 65.90 | 0.533 | 65.91 | 1.220 | 65.90 | 2.892 | 66.89 | 15.33 |
| 66.48 | 0.063 | 66.43 | 0.136 | 65.99 | 0.533 | 66.00 | 1.213 | 66.00 | 2.867 | 66.98 | 15.20 |
| 66.59 | 0.047 | 66.54 | 0.140 | 66.09 | 0.525 | 66.09 | 1.207 | 66.08 | 2.849 | 67.09 | 15.07 |
| 66.67 | 0.057 | 66.63 | 0.138 | 66.18 | 0.523 | 66.20 | 1.200 | 66.19 | 2.832 | 67.17 | 14.90 |
| 66.78 | 0.047 | 66.73 | 0.134 | 66.29 | 0.517 | 66.28 | 1.194 | 66.27 | 2.814 | 67.26 | 14.82 |
| 66.86 | 0.054 | 66.81 | 0.138 | 66.39 | 0.520 | 66.39 | 1.185 | 66.37 | 2.801 | 67.36 | 14.69 |
| 66.98 | 0.060 | 66.92 | 0.134 | 66.46 | 0.511 | 66.48 | 1.177 | 66.45 | 2.777 | 67.46 | 14.59 |
| 67.07 | 0.049 | 67.01 | 0.136 | 66.57 | 0.509 | 66.58 | 1.172 | 66.55 | 2.757 | 67.56 | 14.47 |
| 67.16 | 0.054 | 67.11 | 0.135 | 66.66 | 0.510 | 66.67 | 1.166 | 66.64 | 2.738 | 67.65 | 14.37 |
| 67.26 | 0.054 | 67.21 | 0.136 | 66.75 | 0.506 | 66.76 | 1.153 | 66.72 | 2.723 | 67.74 | 14.26 |
| 67.34 | 0.063 | 67.30 | 0.136 | 66.84 | 0.501 | 66.86 | 1.143 | 66.84 | 2.701 | 67.84 | 14.14 |
| 67.45 | 0.049 | 67.37 | 0.135 | 66.96 | 0.501 | 66.95 | 1.142 | 66.92 | 2.696 | 67.94 | 14.05 |
| 67.53 | 0.060 | 67.49 | 0.129 | 67.05 | 0.501 | 67.05 | 1.134 | 67.02 | 2.666 | 68.03 | 13.91 |
| 67.64 | 0.062 | 67.58 | 0.135 | 67.14 | 0.491 | 67.13 | 1.126 | 67.12 | 2.652 | 68.12 | 13.73 |
| 67.74 | 0.054 | 67.67 | 0.132 | 67.24 | 0.490 | 67.21 | 1.120 | 67.19 | 2.636 | 68.23 | 13.63 |
| 67.83 | 0.045 | 67.77 | 0.126 | 67.32 | 0.491 | 67.31 | 1.115 | 67.30 | 2.617 | 68.33 | 13.54 |
| 67.91 | 0.059 | 67.87 | 0.129 | 67.41 | 0.487 | 67.40 | 1.103 | 67.39 | 2.607 | 68.42 | 13.42 |
| 68.02 | 0.059 | 67.95 | 0.131 | 67.53 | 0.493 | 67.50 | 1.101 | 67.48 | 2.583 | 68.53 | 13.29 |
| 68.12 | 0.045 | 68.06 | 0.129 | 67.61 | 0.481 | 67.61 | 1.099 | 67.57 | 2.564 | 68.60 | 13.25 |
| 68.22 | 0.061 | 68.15 | 0.129 | 67.72 | 0.480 | 67.70 | 1.088 | 67.66 | 2.549 | 68.70 | 13.08 |
| 68.32 | 0.054 | 68.25 | 0.134 | 67.81 | 0.477 | 67.78 | 1.088 | 67.76 | 2.525 | 68.80 | 12.99 |
| 68.41 | 0.054 | 68.34 | 0.128 | 67.91 | 0.478 | 67.87 | 1.075 | 67.87 | 2.511 | 68.90 | 12.94 |
| 68.51 | 0.050 | 68.44 | 0.127 | 68.01 | 0.473 | 67.97 | 1.071 | 67.95 | 2.495 | 68.98 | 12.79 |
| 68.59 | 0.055 | 68.53 | 0.131 | 68.10 | 0.472 | 68.07 | 1.062 | 68.04 | 2.483 | 69.08 | 12.72 |
| 68.68 | 0.054 | 68.64 | 0.127 | 68.19 | 0.465 | 68.17 | 1.058 | 68.14 | 2.461 | 69.17 | 12.54 |
| 68.78 | 0.054 | 68.73 | 0.130 | 68.29 | 0.463 | 68.25 | 1.052 | 68.23 | 2.449 | 69.27 | 12.50 |

|       |       |       |       |       |       |       |       |       |       |       |       |
|-------|-------|-------|-------|-------|-------|-------|-------|-------|-------|-------|-------|
| 68.87 | 0.054 | 68.82 | 0.133 | 68.38 | 0.462 | 68.35 | 1.044 | 68.32 | 2.436 | 69.36 | 12.34 |
| 68.97 | 0.058 | 68.90 | 0.130 | 68.47 | 0.457 | 68.45 | 1.041 | 68.43 | 2.413 | 69.46 | 12.29 |
| 69.07 | 0.058 | 68.99 | 0.125 | 68.57 | 0.454 | 68.53 | 1.029 | 68.52 | 2.401 | 69.56 | 12.21 |
| 69.17 | 0.051 | 69.09 | 0.124 | 68.65 | 0.458 | 68.65 | 1.026 | 68.62 | 2.386 | 69.64 | 12.08 |
| 69.26 | 0.056 | 69.19 | 0.126 | 68.76 | 0.452 | 68.71 | 1.022 | 68.73 | 2.376 | 69.75 | 11.97 |
| 69.35 | 0.056 | 69.28 | 0.122 | 68.85 | 0.448 | 68.81 | 1.013 | 68.79 | 2.355 | 69.86 | 11.88 |
| 69.45 | 0.052 | 69.36 | 0.119 | 68.94 | 0.451 | 68.92 | 1.007 | 68.91 | 2.335 | 69.95 | 11.81 |
| 69.56 | 0.057 | 69.47 | 0.122 | 69.06 | 0.445 | 69.00 | 1.005 | 68.99 | 2.323 | 70.04 | 11.69 |
| 69.62 | 0.055 | 69.56 | 0.121 | 69.13 | 0.439 | 69.10 | 1.000 | 69.08 | 2.312 | 70.14 | 11.60 |
| 69.73 | 0.050 | 69.66 | 0.121 | 69.24 | 0.443 | 69.21 | 0.989 | 69.19 | 2.298 | 70.23 | 11.56 |
| 69.82 | 0.056 | 69.77 | 0.123 | 69.34 | 0.440 | 69.28 | 0.984 | 69.27 | 2.277 | 70.34 | 11.39 |
| 69.91 | 0.042 | 69.86 | 0.124 | 69.44 | 0.433 | 69.37 | 0.978 | 69.37 | 2.272 | 70.42 | 11.29 |
| 70.01 | 0.051 | 69.95 | 0.122 | 69.53 | 0.432 | 69.47 | 0.981 | 69.47 | 2.245 | 70.51 | 11.23 |
| 70.12 | 0.057 | 70.04 | 0.119 | 69.62 | 0.432 | 69.56 | 0.969 | 69.56 | 2.238 | 70.61 | 11.13 |
| 70.21 | 0.052 | 70.14 | 0.123 | 69.72 | 0.431 | 69.68 | 0.964 | 69.66 | 2.216 | 70.71 | 11.05 |
| 70.30 | 0.052 | 70.25 | 0.119 | 69.79 | 0.430 | 69.76 | 0.956 | 69.74 | 2.208 | 70.82 | 10.95 |
| 70.40 | 0.053 | 70.33 | 0.112 | 69.91 | 0.424 | 69.85 | 0.951 | 69.83 | 2.187 | 70.89 | 10.89 |
| 70.48 | 0.048 | 70.44 | 0.120 | 69.98 | 0.420 | 69.96 | 0.942 | 69.95 | 2.174 | 71.00 | 10.81 |
| 70.59 | 0.057 | 70.53 | 0.121 | 70.08 | 0.424 | 70.04 | 0.939 | 70.03 | 2.157 | 71.10 | 10.73 |
| 70.67 | 0.057 | 70.63 | 0.121 | 70.18 | 0.418 | 70.14 | 0.938 | 70.15 | 2.147 | 71.20 | 10.66 |
| 70.78 | 0.054 | 70.73 | 0.118 | 70.26 | 0.417 | 70.24 | 0.926 | 70.22 | 2.134 | 71.29 | 10.56 |
| 70.87 | 0.046 | 70.81 | 0.121 | 70.37 | 0.412 | 70.33 | 0.923 | 70.32 | 2.121 | 71.40 | 10.47 |
| 70.96 | 0.042 | 70.90 | 0.111 | 70.48 | 0.408 | 70.41 | 0.917 | 70.42 | 2.099 | 71.48 | 10.35 |
| 71.07 | 0.051 | 71.00 | 0.118 | 70.55 | 0.409 | 70.51 | 0.910 | 70.51 | 2.095 | 71.59 | 10.30 |
| 71.18 | 0.059 | 71.07 | 0.116 | 70.66 | 0.408 | 70.62 | 0.909 | 70.60 | 2.081 | 71.68 | 10.23 |
| 71.27 | 0.047 | 71.19 | 0.122 | 70.77 | 0.407 | 70.70 | 0.900 | 70.72 | 2.064 | 71.77 | 10.14 |
| 71.35 | 0.047 | 71.27 | 0.116 | 70.85 | 0.403 | 70.80 | 0.895 | 70.80 | 2.052 | 71.85 | 10.01 |
| 71.45 | 0.059 | 71.37 | 0.114 | 70.94 | 0.400 | 70.90 | 0.896 | 70.90 | 2.041 | 71.97 | 9.96  |
| 71.56 | 0.055 | 71.48 | 0.114 | 71.05 | 0.398 | 70.99 | 0.886 | 70.99 | 2.033 | 72.05 | 9.88  |
| 71.66 | 0.054 | 71.57 | 0.122 | 71.13 | 0.399 | 71.08 | 0.881 | 71.10 | 2.012 | 72.17 | 9.84  |
| 71.75 | 0.049 | 71.68 | 0.114 | 71.23 | 0.394 | 71.17 | 0.876 | 71.18 | 1.997 | 72.25 | 9.77  |
| 71.83 | 0.048 | 71.76 | 0.115 | 71.33 | 0.395 | 71.28 | 0.871 | 71.28 | 1.986 | 72.34 | 9.71  |
| 71.94 | 0.053 | 71.85 | 0.112 | 71.43 | 0.390 | 71.35 | 0.864 | 71.37 | 1.978 | 72.45 | 9.60  |
| 72.03 | 0.051 | 71.96 | 0.113 | 71.53 | 0.387 | 71.44 | 0.863 | 71.47 | 1.960 | 72.54 | 9.51  |
| 72.12 | 0.053 | 72.05 | 0.117 | 71.61 | 0.385 | 71.53 | 0.852 | 71.57 | 1.948 | 72.64 | 9.45  |
| 72.22 | 0.050 | 72.14 | 0.116 | 71.71 | 0.388 | 71.65 | 0.855 | 71.66 | 1.935 | 72.74 | 9.37  |
| 72.32 | 0.050 | 72.24 | 0.114 | 71.80 | 0.379 | 71.73 | 0.854 | 71.75 | 1.925 | 72.83 | 9.31  |
| 72.41 | 0.050 | 72.33 | 0.114 | 71.89 | 0.379 | 71.82 | 0.846 | 71.84 | 1.909 | 72.92 | 9.26  |
| 72.50 | 0.046 | 72.45 | 0.116 | 71.99 | 0.376 | 71.92 | 0.838 | 71.93 | 1.899 | 73.03 | 9.11  |
| 72.61 | 0.045 | 72.51 | 0.108 | 72.09 | 0.375 | 72.01 | 0.832 | 72.04 | 1.888 | 73.12 | 9.06  |
| 72.71 | 0.058 | 72.62 | 0.111 | 72.17 | 0.371 | 72.11 | 0.825 | 72.13 | 1.874 | 73.22 | 9.01  |
| 72.80 | 0.059 | 72.70 | 0.110 | 72.27 | 0.376 | 72.21 | 0.827 | 72.23 | 1.870 | 73.30 | 8.92  |

|       |       |       |       |       |       |       |       |       |       |       |      |
|-------|-------|-------|-------|-------|-------|-------|-------|-------|-------|-------|------|
| 72.89 | 0.049 | 72.81 | 0.113 | 72.37 | 0.371 | 72.30 | 0.820 | 72.31 | 1.856 | 73.41 | 8.85 |
| 72.99 | 0.053 | 72.91 | 0.112 | 72.45 | 0.371 | 72.38 | 0.813 | 72.42 | 1.840 | 73.49 | 8.83 |
| 73.09 | 0.048 | 72.99 | 0.107 | 72.55 | 0.365 | 72.48 | 0.810 | 72.50 | 1.830 | 73.59 | 8.73 |
| 73.18 | 0.060 | 73.10 | 0.114 | 72.66 | 0.365 | 72.56 | 0.803 | 72.60 | 1.821 | 73.70 | 8.66 |
| 73.28 | 0.054 | 73.19 | 0.100 | 72.75 | 0.368 | 72.67 | 0.802 | 72.71 | 1.806 | 73.78 | 8.62 |
| 73.39 | 0.054 | 73.29 | 0.109 | 72.84 | 0.360 | 72.76 | 0.800 | 72.77 | 1.794 | 73.89 | 8.55 |
| 73.48 | 0.043 | 73.37 | 0.112 | 72.94 | 0.358 | 72.85 | 0.790 | 72.88 | 1.785 | 73.98 | 8.52 |
| 73.58 | 0.052 | 73.48 | 0.109 | 73.03 | 0.358 | 72.93 | 0.788 | 72.98 | 1.769 | 74.07 | 8.42 |
| 73.66 | 0.046 | 73.57 | 0.109 | 73.12 | 0.356 | 73.03 | 0.783 | 73.07 | 1.756 | 74.17 | 8.34 |
| 73.78 | 0.048 | 73.67 | 0.111 | 73.23 | 0.355 | 73.13 | 0.784 | 73.17 | 1.749 | 74.26 | 8.30 |
| 73.87 | 0.052 | 73.76 | 0.112 | 73.30 | 0.356 | 73.22 | 0.776 | 73.25 | 1.740 | 74.35 | 8.21 |
| 73.96 | 0.056 | 73.88 | 0.110 | 73.39 | 0.355 | 73.32 | 0.773 | 73.37 | 1.725 | 74.46 | 8.15 |
| 74.03 | 0.055 | 73.98 | 0.103 | 73.49 | 0.348 | 73.41 | 0.768 | 73.44 | 1.717 | 74.56 | 8.11 |
| 74.15 | 0.056 | 74.06 | 0.109 | 73.60 | 0.354 | 73.50 | 0.763 | 73.54 | 1.705 | 74.66 | 8.01 |
| 74.24 | 0.052 | 74.15 | 0.110 | 73.68 | 0.346 | 73.60 | 0.756 | 73.65 | 1.700 | 74.77 | 7.95 |
| 74.34 | 0.048 | 74.25 | 0.105 | 73.78 | 0.347 | 73.69 | 0.758 | 73.75 | 1.685 | 74.85 | 7.93 |
| 74.43 | 0.046 | 74.34 | 0.107 | 73.87 | 0.340 | 73.77 | 0.751 | 73.84 | 1.677 | 74.96 | 7.87 |
| 74.52 | 0.044 | 74.44 | 0.106 | 73.98 | 0.345 | 73.88 | 0.745 | 73.92 | 1.665 | 75.03 | 7.80 |
| 74.62 | 0.047 | 74.52 | 0.102 | 74.06 | 0.341 | 73.98 | 0.746 | 74.03 | 1.657 | 75.15 | 7.74 |
| 74.72 | 0.059 | 74.62 | 0.104 | 74.17 | 0.340 | 74.07 | 0.744 | 74.11 | 1.645 | 75.24 | 7.66 |
| 74.81 | 0.059 | 74.73 | 0.102 | 74.26 | 0.340 | 74.16 | 0.737 | 74.21 | 1.633 | 75.33 | 7.61 |
| 74.89 | 0.054 | 74.82 | 0.105 | 74.36 | 0.342 | 74.26 | 0.731 | 74.31 | 1.626 | 75.43 | 7.57 |
| 74.99 | 0.048 | 74.93 | 0.103 | 74.44 | 0.335 | 74.35 | 0.725 | 74.39 | 1.616 | 75.52 | 7.50 |
| 75.09 | 0.042 | 75.01 | 0.099 | 74.53 | 0.334 | 74.46 | 0.721 | 74.50 | 1.607 | 75.63 | 7.45 |
| 75.20 | 0.050 | 75.12 | 0.112 | 74.64 | 0.331 | 74.56 | 0.718 | 74.57 | 1.599 | 75.72 | 7.39 |
| 75.28 | 0.053 | 75.20 | 0.102 | 74.72 | 0.329 | 74.64 | 0.713 | 74.69 | 1.588 | 75.80 | 7.35 |
| 75.39 | 0.051 | 75.31 | 0.103 | 74.82 | 0.329 | 74.73 | 0.711 | 74.77 | 1.578 | 75.89 | 7.26 |
| 75.48 | 0.050 | 75.39 | 0.102 | 74.93 | 0.323 | 74.84 | 0.705 | 74.86 | 1.570 | 75.99 | 7.24 |
| 75.59 | 0.054 | 75.49 | 0.104 | 75.02 | 0.321 | 74.92 | 0.700 | 74.97 | 1.560 | 76.09 | 7.18 |
| 75.66 | 0.052 | 75.60 | 0.099 | 75.11 | 0.323 | 75.02 | 0.698 | 75.06 | 1.543 | 76.21 | 7.12 |
| 75.77 | 0.047 | 75.69 | 0.101 | 75.22 | 0.325 | 75.11 | 0.694 | 75.15 | 1.539 | 76.28 | 7.08 |
| 75.87 | 0.041 | 75.79 | 0.102 | 75.30 | 0.316 | 75.21 | 0.690 | 75.24 | 1.529 | 76.38 | 7.00 |
| 75.96 | 0.055 | 75.87 | 0.098 | 75.40 | 0.315 | 75.31 | 0.690 | 75.33 | 1.527 | 76.48 | 6.98 |
| 76.06 | 0.047 | 75.96 | 0.103 | 75.48 | 0.315 | 75.40 | 0.683 | 75.43 | 1.511 | 76.58 | 6.89 |
| 76.15 | 0.049 | 76.06 | 0.101 | 75.59 | 0.316 | 75.48 | 0.680 | 75.51 | 1.503 | 76.68 | 6.85 |
| 76.26 | 0.050 | 76.17 | 0.097 | 75.68 | 0.314 | 75.58 | 0.674 | 75.61 | 1.493 | 76.77 | 6.77 |
| 76.35 | 0.054 | 76.26 | 0.098 | 75.79 | 0.310 | 75.67 | 0.670 | 75.72 | 1.480 | 76.87 | 6.78 |
| 76.44 | 0.041 | 76.37 | 0.098 | 75.85 | 0.311 | 75.77 | 0.667 | 75.81 | 1.474 | 76.97 | 6.71 |
| 76.54 | 0.044 | 76.45 | 0.095 | 75.96 | 0.311 | 75.87 | 0.664 | 75.90 | 1.462 | 77.05 | 6.68 |
| 76.64 | 0.047 | 76.55 | 0.096 | 76.05 | 0.309 | 75.96 | 0.661 | 75.99 | 1.459 | 77.15 | 6.60 |
| 76.73 | 0.044 | 76.66 | 0.092 | 76.15 | 0.311 | 76.06 | 0.660 | 76.09 | 1.450 | 77.26 | 6.55 |
| 76.83 | 0.054 | 76.74 | 0.100 | 76.24 | 0.306 | 76.14 | 0.655 | 76.19 | 1.440 | 77.35 | 6.50 |

|       |       |       |       |       |       |       |       |       |       |       |      |
|-------|-------|-------|-------|-------|-------|-------|-------|-------|-------|-------|------|
| 76.93 | 0.052 | 76.84 | 0.099 | 76.34 | 0.301 | 76.23 | 0.648 | 76.28 | 1.431 | 77.45 | 6.46 |
| 77.02 | 0.049 | 76.94 | 0.099 | 76.43 | 0.303 | 76.33 | 0.647 | 76.37 | 1.423 | 77.55 | 6.40 |
| 77.11 | 0.041 | 77.02 | 0.094 | 76.54 | 0.302 | 76.44 | 0.643 | 76.46 | 1.414 | 77.64 | 6.38 |
| 77.20 | 0.060 | 77.11 | 0.100 | 76.63 | 0.299 | 76.53 | 0.637 | 76.56 | 1.404 | 77.74 | 6.33 |
| 77.30 | 0.049 | 77.21 | 0.098 | 76.72 | 0.298 | 76.63 | 0.637 | 76.65 | 1.399 | 77.85 | 6.28 |
| 77.39 | 0.047 | 77.31 | 0.093 | 76.82 | 0.296 | 76.72 | 0.634 | 76.75 | 1.384 | 77.92 | 6.24 |
| 77.50 | 0.045 | 77.40 | 0.093 | 76.91 | 0.293 | 76.80 | 0.630 | 76.85 | 1.378 | 78.02 | 6.19 |
| 77.58 | 0.047 | 77.49 | 0.099 | 77.00 | 0.293 | 76.90 | 0.628 | 76.93 | 1.372 | 78.12 | 6.13 |
| 77.69 | 0.046 | 77.60 | 0.099 | 77.10 | 0.292 | 77.00 | 0.622 | 77.03 | 1.364 | 78.22 | 6.10 |
| 77.78 | 0.045 | 77.69 | 0.093 | 77.21 | 0.289 | 77.10 | 0.617 | 77.11 | 1.352 | 78.32 | 6.05 |
| 77.89 | 0.042 | 77.78 | 0.098 | 77.28 | 0.289 | 77.20 | 0.616 | 77.21 | 1.345 | 78.41 | 6.02 |
| 77.98 | 0.050 | 77.87 | 0.089 | 77.39 | 0.288 | 77.29 | 0.615 | 77.32 | 1.343 | 78.52 | 5.97 |
| 78.08 | 0.050 | 77.96 | 0.096 | 77.49 | 0.284 | 77.39 | 0.609 | 77.39 | 1.334 | 78.60 | 5.94 |
| 78.17 | 0.055 | 78.08 | 0.091 | 77.56 | 0.287 | 77.49 | 0.608 | 77.50 | 1.327 | 78.71 | 5.88 |
| 78.25 | 0.046 | 78.16 | 0.095 | 77.66 | 0.287 | 77.57 | 0.604 | 77.59 | 1.314 | 78.79 | 5.83 |
| 78.36 | 0.044 | 78.28 | 0.095 | 77.77 | 0.283 | 77.67 | 0.599 | 77.68 | 1.311 | 78.87 | 5.79 |
| 78.46 | 0.042 | 78.36 | 0.096 | 77.85 | 0.277 | 77.78 | 0.600 | 77.79 | 1.303 | 78.98 | 5.75 |
| 78.55 | 0.049 | 78.47 | 0.094 | 77.94 | 0.278 | 77.86 | 0.592 | 77.88 | 1.292 | 79.08 | 5.71 |
| 78.65 | 0.045 | 78.56 | 0.100 | 78.04 | 0.275 | 77.96 | 0.589 | 77.99 | 1.283 | 79.18 | 5.67 |
| 78.73 | 0.045 | 78.65 | 0.087 | 78.14 | 0.278 | 78.05 | 0.590 | 78.07 | 1.278 | 79.28 | 5.64 |
| 78.84 | 0.045 | 78.74 | 0.096 | 78.24 | 0.277 | 78.14 | 0.582 | 78.17 | 1.270 | 79.36 | 5.61 |
| 78.93 | 0.045 | 78.84 | 0.087 | 78.32 | 0.272 | 78.25 | 0.581 | 78.25 | 1.263 | 79.47 | 5.57 |
| 79.02 | 0.048 | 78.93 | 0.093 | 78.42 | 0.272 | 78.34 | 0.577 | 78.35 | 1.254 | 79.55 | 5.54 |
| 79.12 | 0.045 | 79.03 | 0.094 | 78.52 | 0.273 | 78.42 | 0.575 | 78.45 | 1.251 | 79.67 | 5.48 |
| 79.22 | 0.052 | 79.13 | 0.091 | 78.61 | 0.269 | 78.52 | 0.570 | 78.54 | 1.243 | 79.75 | 5.46 |
| 79.31 | 0.047 | 79.22 | 0.092 | 78.71 | 0.266 | 78.61 | 0.569 | 78.64 | 1.230 | 79.86 | 5.38 |
| 79.42 | 0.048 | 79.32 | 0.088 | 78.80 | 0.271 | 78.71 | 0.567 | 78.72 | 1.229 | 79.93 | 5.34 |
| 79.52 | 0.054 | 79.41 | 0.089 | 78.90 | 0.267 | 78.81 | 0.564 | 78.83 | 1.215 | 80.04 | 5.33 |
| 79.60 | 0.042 | 79.50 | 0.093 | 78.99 | 0.267 | 78.88 | 0.561 | 78.92 | 1.217 | 80.12 | 5.29 |
| 79.70 | 0.051 | 79.58 | 0.099 | 79.09 | 0.266 | 78.98 | 0.556 | 79.02 | 1.202 | 80.13 | 5.28 |
| 79.80 | 0.053 | 79.69 | 0.087 | 79.18 | 0.263 | 79.08 | 0.554 | 79.12 | 1.194 | 80.18 | 5.29 |
| 79.89 | 0.050 | 79.79 | 0.091 | 79.28 | 0.262 | 79.18 | 0.554 | 79.20 | 1.190 | 80.20 | 5.28 |
| 79.99 | 0.046 | 79.90 | 0.093 | 79.37 | 0.259 | 79.26 | 0.548 | 79.31 | 1.182 | 80.21 | 5.30 |
| 80.08 | 0.048 | 79.99 | 0.093 | 79.45 | 0.261 | 79.36 | 0.548 | 79.40 | 1.174 | 80.20 | 5.27 |
| 80.13 | 0.053 | 80.07 | 0.090 | 79.55 | 0.258 | 79.45 | 0.543 | 79.50 | 1.171 | 80.18 | 5.30 |
| 80.19 | 0.047 | 80.16 | 0.093 | 79.66 | 0.259 | 79.56 | 0.540 | 79.58 | 1.164 | 80.18 | 5.30 |
| 80.21 | 0.056 | 80.18 | 0.083 | 79.73 | 0.256 | 79.65 | 0.538 | 79.70 | 1.160 | 80.14 | 5.30 |
| 80.22 | 0.049 | 80.21 | 0.090 | 79.82 | 0.254 | 79.74 | 0.539 | 79.78 | 1.150 | 80.13 | 5.33 |
| 80.23 | 0.054 | 80.25 | 0.089 | 79.93 | 0.256 | 79.83 | 0.535 | 79.86 | 1.138 | 80.11 | 5.32 |
| 80.23 | 0.047 | 80.25 | 0.088 | 80.02 | 0.252 | 79.94 | 0.531 | 79.96 | 1.136 | 80.09 | 5.35 |
| 80.24 | 0.049 | 80.25 | 0.090 | 80.10 | 0.248 | 80.02 | 0.527 | 80.06 | 1.129 | 80.07 | 5.36 |
| 80.21 | 0.055 | 80.23 | 0.093 | 80.16 | 0.248 | 80.11 | 0.528 | 80.13 | 1.126 | 80.05 | 5.35 |

|       |       |       |       |       |       |       |       |       |       |       |      |
|-------|-------|-------|-------|-------|-------|-------|-------|-------|-------|-------|------|
| 80.19 | 0.048 | 80.21 | 0.090 | 80.20 | 0.254 | 80.15 | 0.525 | 80.18 | 1.128 | 80.02 | 5.36 |
| 80.18 | 0.051 | 80.19 | 0.089 | 80.22 | 0.250 | 80.19 | 0.526 | 80.21 | 1.127 | 80.01 | 5.36 |
| 80.15 | 0.051 | 80.18 | 0.087 | 80.24 | 0.253 | 80.21 | 0.527 | 80.24 | 1.125 | 79.99 | 5.36 |
| 80.12 | 0.052 | 80.15 | 0.087 | 80.24 | 0.252 | 80.23 | 0.529 | 80.24 | 1.124 | 79.99 | 5.37 |
| 80.11 | 0.040 | 80.13 | 0.091 | 80.23 | 0.252 | 80.25 | 0.524 | 80.24 | 1.124 | 80.00 | 5.36 |
| 80.07 | 0.051 | 80.09 | 0.089 | 80.23 | 0.254 | 80.23 | 0.527 | 80.24 | 1.123 | 79.99 | 5.39 |
| 80.06 | 0.045 | 80.07 | 0.090 | 80.20 | 0.255 | 80.23 | 0.525 | 80.23 | 1.128 | 79.96 | 5.38 |
| 80.04 | 0.048 | 80.04 | 0.091 | 80.21 | 0.252 | 80.21 | 0.528 | 80.21 | 1.131 | 79.98 | 5.37 |
| 80.01 | 0.048 | 80.04 | 0.092 | 80.16 | 0.253 | 80.18 | 0.529 | 80.21 | 1.131 | 79.99 | 5.36 |
| 80.01 | 0.061 | 80.03 | 0.091 | 80.17 | 0.253 | 80.18 | 0.525 | 80.18 | 1.134 | 79.99 | 5.36 |
| 79.98 | 0.047 | 80.00 | 0.094 | 80.15 | 0.252 | 80.15 | 0.527 | 80.16 | 1.134 | 79.97 | 5.38 |
| 79.98 | 0.047 | 79.99 | 0.089 | 80.11 | 0.257 | 80.13 | 0.530 | 80.12 | 1.135 | 79.99 | 5.37 |
| 79.99 | 0.047 | 79.98 | 0.093 | 80.08 | 0.256 | 80.10 | 0.530 | 80.10 | 1.138 | 79.98 | 5.36 |
| 79.98 | 0.057 | 79.98 | 0.086 | 80.05 | 0.256 | 80.09 | 0.534 | 80.08 | 1.143 | 80.00 | 5.37 |
| 79.97 | 0.045 | 79.97 | 0.090 | 80.05 | 0.256 | 80.08 | 0.534 | 80.05 | 1.135 | 79.99 | 5.37 |
| 79.97 | 0.050 | 79.97 | 0.087 | 80.01 | 0.256 | 80.03 | 0.536 | 80.04 | 1.144 | 80.00 | 5.38 |
| 79.97 | 0.050 | 79.97 | 0.087 | 80.01 | 0.258 | 80.03 | 0.532 | 80.02 | 1.145 | 80.00 | 5.37 |
| 79.97 | 0.047 | 79.95 | 0.091 | 80.00 | 0.257 | 80.02 | 0.533 | 80.00 | 1.147 | 80.00 | 5.38 |
| 79.97 | 0.056 | 79.96 | 0.088 | 79.97 | 0.257 | 80.00 | 0.530 | 79.99 | 1.150 | 79.99 | 5.37 |
| 79.99 | 0.049 | 79.98 | 0.088 | 79.99 | 0.255 | 79.99 | 0.535 | 79.98 | 1.151 | 80.00 | 5.38 |
| 80.00 | 0.051 | 79.97 | 0.092 | 79.96 | 0.257 | 79.98 | 0.537 | 79.97 | 1.154 | 79.99 | 5.36 |
| 79.99 | 0.049 | 79.98 | 0.086 | 79.96 | 0.253 | 79.98 | 0.537 | 79.97 | 1.149 | 80.01 | 5.38 |
| 80.00 | 0.052 | 79.99 | 0.095 | 79.96 | 0.256 | 79.98 | 0.532 | 79.97 | 1.151 | 80.01 | 5.38 |
| 80.00 | 0.046 | 79.98 | 0.094 | 79.97 | 0.256 | 79.98 | 0.536 | 79.98 | 1.153 | 80.01 | 5.38 |
| 80.00 | 0.053 | 79.99 | 0.089 | 79.96 | 0.255 | 79.96 | 0.534 | 79.96 | 1.150 | 80.00 | 5.39 |
| 79.99 | 0.047 | 79.99 | 0.091 | 79.98 | 0.254 | 79.97 | 0.541 | 79.97 | 1.147 | 80.00 | 5.37 |
| 80.00 | 0.050 | 79.99 | 0.090 | 79.97 | 0.254 | 79.97 | 0.541 | 79.98 | 1.150 | 80.00 | 5.39 |
| 80.01 | 0.048 | 80.00 | 0.095 | 79.98 | 0.257 | 79.98 | 0.539 | 79.97 | 1.151 | 80.00 | 5.37 |
| 80.00 | 0.051 | 80.00 | 0.088 | 79.97 | 0.254 | 79.97 | 0.534 | 79.98 | 1.153 | 80.00 | 5.39 |
| 80.00 | 0.041 | 80.01 | 0.092 | 79.98 | 0.258 | 79.97 | 0.536 | 79.99 | 1.148 | 80.02 | 5.38 |
| 80.01 | 0.040 | 80.00 | 0.092 | 79.98 | 0.252 | 79.99 | 0.535 | 79.98 | 1.148 | 80.01 | 5.39 |
| 80.01 | 0.050 | 80.02 | 0.090 | 80.00 | 0.257 | 79.97 | 0.536 | 79.98 | 1.152 | 80.01 | 5.39 |
| 80.01 | 0.052 | 80.01 | 0.096 | 80.00 | 0.256 | 79.99 | 0.533 | 80.00 | 1.148 | 80.00 | 5.40 |
| 80.02 | 0.051 | 80.01 | 0.088 | 80.01 | 0.255 | 79.99 | 0.537 | 80.00 | 1.149 | 80.01 | 5.38 |
| 80.01 | 0.048 | 80.00 | 0.090 | 80.00 | 0.255 | 79.99 | 0.538 | 80.01 | 1.149 | 80.01 | 5.38 |
| 80.02 | 0.053 | 80.01 | 0.087 | 80.01 | 0.255 | 80.00 | 0.534 | 80.00 | 1.154 | 80.00 | 5.40 |
| 80.01 | 0.049 | 80.01 | 0.093 | 80.00 | 0.256 | 80.00 | 0.535 | 79.99 | 1.143 | 80.00 | 5.39 |
| 80.01 | 0.046 | 80.01 | 0.093 | 80.02 | 0.256 | 80.01 | 0.540 | 80.00 | 1.149 | 80.01 | 5.38 |
| 80.01 | 0.053 | 80.01 | 0.089 | 80.00 | 0.253 | 80.00 | 0.535 | 80.01 | 1.147 |       |      |
| 80.01 | 0.048 | 80.00 | 0.088 | 80.02 | 0.257 | 80.01 | 0.535 | 80.00 | 1.147 |       |      |
| 80.00 | 0.047 | 80.02 | 0.086 | 80.01 | 0.254 | 80.00 | 0.537 | 80.00 | 1.147 |       |      |
| 80.00 | 0.049 | 80.01 | 0.091 | 80.01 | 0.257 | 80.01 | 0.540 | 80.02 | 1.145 |       |      |

|       |       |       |       |       |       |       |       |       |       |
|-------|-------|-------|-------|-------|-------|-------|-------|-------|-------|
| 80.00 | 0.049 | 80.01 | 0.088 | 80.02 | 0.256 | 80.00 | 0.538 | 80.01 | 1.149 |
| 80.00 | 0.058 | 80.03 | 0.092 | 80.01 | 0.259 | 80.01 | 0.538 | 80.01 | 1.149 |
|       |       | 80.01 | 0.088 | 80.01 | 0.254 | 80.01 | 0.538 | 80.01 | 1.150 |
|       |       |       |       | 80.02 | 0.260 | 80.02 | 0.537 | 80.01 | 1.147 |
|       |       |       |       | 80.00 | 0.259 | 80.02 | 0.535 | 80.02 | 1.149 |
|       |       |       |       | 80.00 | 0.253 | 79.99 | 0.536 | 80.01 | 1.152 |
|       |       |       |       | 80.01 | 0.255 | 80.00 | 0.535 | 80.02 | 1.148 |
|       |       |       |       | 80.01 | 0.253 | 80.01 | 0.536 | 80.01 | 1.150 |
|       |       |       |       | 80.01 | 0.256 | 80.00 | 0.534 | 80.01 | 1.146 |
|       |       |       |       |       |       | 80.00 | 0.541 | 80.02 | 1.147 |

**Table S13.** Complex viscosity (Pa·s) vs. temperature (°C) raw data for G4 samples 1:1 through to 1:3.

| 1:1   |          | 1:1.25 |          | 1:1.5 |          | 1:1.75 |          | 1:2   |          | 1:2.5 |          | 1:3   |          |
|-------|----------|--------|----------|-------|----------|--------|----------|-------|----------|-------|----------|-------|----------|
| Temp  | $\eta^*$ | Temp   | $\eta^*$ | Temp  | $\eta^*$ | Temp   | $\eta^*$ | Temp  | $\eta^*$ | Temp  | $\eta^*$ | Temp  | $\eta^*$ |
| 25.46 | 0.181    | 24.99  | 0.236    | 25.01 | 0.859    | 25.01  | 2.165    | 25.30 | 3.661    | 25.44 | 29.108   | 25.05 | 64.431   |
| 25.50 | 0.181    | 25.04  | 0.237    | 25.02 | 0.858    | 25.05  | 2.151    | 25.35 | 3.644    | 25.45 | 29.242   | 25.09 | 64.676   |
| 25.53 | 0.180    | 25.08  | 0.231    | 25.05 | 0.856    | 25.11  | 2.133    | 25.37 | 3.648    | 25.45 | 29.365   | 25.15 | 64.593   |
| 25.55 | 0.176    | 25.15  | 0.232    | 25.11 | 0.850    | 25.19  | 2.122    | 25.40 | 3.649    | 25.46 | 29.441   | 25.23 | 64.710   |
| 25.59 | 0.178    | 25.21  | 0.231    | 25.17 | 0.852    | 25.26  | 2.103    | 25.43 | 3.630    | 25.45 | 29.450   | 25.30 | 64.472   |
| 25.61 | 0.179    | 25.31  | 0.231    | 25.26 | 0.836    | 25.36  | 2.076    | 25.48 | 3.612    | 25.46 | 29.546   | 25.41 | 64.234   |
| 25.63 | 0.175    | 25.40  | 0.230    | 25.37 | 0.836    | 25.45  | 2.059    | 25.53 | 3.595    | 25.48 | 29.522   | 25.54 | 63.777   |
| 25.67 | 0.176    | 25.53  | 0.233    | 25.46 | 0.827    | 25.55  | 2.039    | 25.60 | 3.570    | 25.52 | 29.387   | 25.63 | 63.418   |
| 25.72 | 0.180    | 25.62  | 0.226    | 25.57 | 0.816    | 25.67  | 2.015    | 25.68 | 3.548    | 25.60 | 29.237   | 25.77 | 62.987   |
| 25.79 | 0.178    | 25.74  | 0.225    | 25.69 | 0.814    | 25.80  | 1.998    | 25.76 | 3.513    | 25.68 | 28.971   | 25.89 | 62.624   |
| 25.86 | 0.175    | 25.85  | 0.221    | 25.81 | 0.805    | 25.90  | 1.977    | 25.85 | 3.474    | 25.77 | 28.673   | 25.99 | 61.999   |
| 25.94 | 0.176    | 25.97  | 0.219    | 25.95 | 0.793    | 26.01  | 1.949    | 25.95 | 3.448    | 25.87 | 28.446   | 26.13 | 61.469   |
| 26.04 | 0.173    | 26.10  | 0.217    | 26.08 | 0.785    | 26.13  | 1.936    | 26.06 | 3.415    | 25.97 | 28.099   | 26.24 | 61.061   |
| 26.13 | 0.174    | 26.21  | 0.221    | 26.20 | 0.773    | 26.23  | 1.910    | 26.17 | 3.369    | 26.08 | 27.809   | 26.38 | 60.435   |
| 26.24 | 0.168    | 26.35  | 0.214    | 26.32 | 0.773    | 26.34  | 1.893    | 26.26 | 3.350    | 26.20 | 27.425   | 26.48 | 60.125   |
| 26.33 | 0.168    | 26.44  | 0.217    | 26.45 | 0.765    | 26.46  | 1.875    | 26.38 | 3.310    | 26.32 | 27.052   | 26.62 | 59.737   |
| 26.46 | 0.167    | 26.58  | 0.214    | 26.54 | 0.756    | 26.57  | 1.856    | 26.51 | 3.275    | 26.44 | 26.671   | 26.71 | 59.434   |
| 26.55 | 0.172    | 26.70  | 0.212    | 26.67 | 0.750    | 26.67  | 1.839    | 26.62 | 3.247    | 26.56 | 26.258   | 26.82 | 58.915   |
| 26.66 | 0.168    | 26.80  | 0.216    | 26.78 | 0.746    | 26.78  | 1.816    | 26.73 | 3.214    | 26.69 | 25.841   | 26.92 | 58.695   |
| 26.78 | 0.165    | 26.92  | 0.210    | 26.91 | 0.737    | 26.87  | 1.809    | 26.83 | 3.187    | 26.82 | 25.532   | 27.03 | 58.386   |
| 26.89 | 0.167    | 27.03  | 0.208    | 27.00 | 0.733    | 26.96  | 1.790    | 26.95 | 3.148    | 26.93 | 25.242   | 27.13 | 57.890   |
| 26.99 | 0.163    | 27.13  | 0.208    | 27.11 | 0.733    | 27.06  | 1.773    | 27.07 | 3.121    | 27.04 | 24.842   | 27.25 | 57.666   |
| 27.11 | 0.162    | 27.22  | 0.205    | 27.19 | 0.722    | 27.16  | 1.761    | 27.18 | 3.089    | 27.16 | 24.605   | 27.33 | 57.172   |
| 27.20 | 0.163    | 27.33  | 0.205    | 27.29 | 0.715    | 27.24  | 1.740    | 27.27 | 3.064    | 27.28 | 24.258   | 27.42 | 56.690   |
| 27.32 | 0.161    | 27.43  | 0.201    | 27.40 | 0.710    | 27.34  | 1.722    | 27.40 | 3.033    | 27.40 | 24.062   | 27.52 | 56.511   |
| 27.42 | 0.162    | 27.53  | 0.194    | 27.49 | 0.700    | 27.44  | 1.711    | 27.49 | 3.003    | 27.50 | 23.790   | 27.62 | 56.162   |
| 27.52 | 0.160    | 27.63  | 0.200    | 27.58 | 0.701    | 27.52  | 1.699    | 27.59 | 2.979    | 27.61 | 23.512   | 27.70 | 55.657   |
| 27.63 | 0.158    | 27.73  | 0.198    | 27.68 | 0.693    | 27.62  | 1.685    | 27.69 | 2.952    | 27.71 | 23.362   | 27.80 | 55.105   |



|       |       |       |       |       |       |       |       |       |       |       |        |       |        |
|-------|-------|-------|-------|-------|-------|-------|-------|-------|-------|-------|--------|-------|--------|
| 27.73 | 0.158 | 27.83 | 0.199 | 27.77 | 0.693 | 27.72 | 1.672 | 27.79 | 2.923 | 27.82 | 23.104 | 27.90 | 54.969 |
| 27.82 | 0.153 | 27.91 | 0.202 | 27.86 | 0.684 | 27.80 | 1.657 | 27.89 | 2.893 | 27.90 | 22.792 | 27.99 | 54.605 |
| 27.92 | 0.158 | 27.99 | 0.195 | 27.95 | 0.684 | 27.89 | 1.645 | 27.98 | 2.878 | 28.01 | 22.577 | 28.07 | 54.032 |
| 28.03 | 0.154 | 28.09 | 0.195 | 28.03 | 0.679 | 27.98 | 1.630 | 28.07 | 2.853 | 28.09 | 22.416 | 28.17 | 53.679 |
| 28.11 | 0.148 | 28.18 | 0.195 | 28.11 | 0.669 | 28.07 | 1.613 | 28.17 | 2.835 | 28.19 | 22.213 | 28.26 | 53.294 |
| 28.21 | 0.154 | 28.27 | 0.195 | 28.21 | 0.665 | 28.17 | 1.601 | 28.26 | 2.804 | 28.28 | 21.954 | 28.35 | 53.134 |
| 28.31 | 0.149 | 28.36 | 0.191 | 28.31 | 0.670 | 28.28 | 1.587 | 28.35 | 2.786 | 28.38 | 21.736 | 28.45 | 52.875 |
| 28.40 | 0.153 | 28.46 | 0.193 | 28.38 | 0.664 | 28.36 | 1.580 | 28.45 | 2.761 | 28.46 | 21.451 | 28.54 | 52.597 |
| 28.49 | 0.149 | 28.57 | 0.189 | 28.50 | 0.650 | 28.45 | 1.559 | 28.56 | 2.743 | 28.54 | 21.320 | 28.64 | 52.398 |
| 28.59 | 0.152 | 28.66 | 0.190 | 28.58 | 0.645 | 28.56 | 1.546 | 28.64 | 2.716 | 28.66 | 21.047 | 28.73 | 51.775 |
| 28.68 | 0.150 | 28.75 | 0.187 | 28.67 | 0.644 | 28.66 | 1.536 | 28.73 | 2.688 | 28.76 | 20.750 | 28.84 | 51.685 |
| 28.77 | 0.149 | 28.85 | 0.184 | 28.76 | 0.641 | 28.74 | 1.524 | 28.83 | 2.667 | 28.84 | 20.639 | 28.93 | 51.389 |
| 28.87 | 0.147 | 28.94 | 0.186 | 28.87 | 0.637 | 28.82 | 1.509 | 28.93 | 2.657 | 28.94 | 20.368 | 29.04 | 51.117 |
| 28.95 | 0.144 | 29.03 | 0.186 | 28.95 | 0.625 | 28.93 | 1.496 | 29.02 | 2.626 | 29.03 | 20.223 | 29.12 | 50.854 |
| 29.04 | 0.143 | 29.12 | 0.182 | 29.05 | 0.619 | 29.02 | 1.487 | 29.12 | 2.606 | 29.12 | 20.049 | 29.23 | 50.244 |
| 29.15 | 0.144 | 29.23 | 0.184 | 29.14 | 0.620 | 29.09 | 1.471 | 29.21 | 2.579 | 29.21 | 19.904 | 29.31 | 49.971 |
| 29.23 | 0.144 | 29.32 | 0.182 | 29.23 | 0.617 | 29.20 | 1.458 | 29.30 | 2.567 | 29.31 | 19.758 | 29.41 | 49.408 |
| 29.34 | 0.148 | 29.42 | 0.181 | 29.33 | 0.612 | 29.29 | 1.445 | 29.39 | 2.538 | 29.40 | 19.531 | 29.51 | 49.024 |
| 29.41 | 0.138 | 29.50 | 0.182 | 29.42 | 0.616 | 29.39 | 1.435 | 29.51 | 2.513 | 29.48 | 19.376 | 29.61 | 48.482 |
| 29.52 | 0.139 | 29.61 | 0.180 | 29.53 | 0.601 | 29.49 | 1.419 | 29.60 | 2.493 | 29.60 | 19.195 | 29.72 | 48.288 |
| 29.61 | 0.145 | 29.70 | 0.178 | 29.60 | 0.593 | 29.59 | 1.412 | 29.70 | 2.478 | 29.70 | 18.999 | 29.80 | 47.744 |
| 29.70 | 0.141 | 29.80 | 0.172 | 29.71 | 0.597 | 29.68 | 1.400 | 29.79 | 2.461 | 29.78 | 18.835 | 29.91 | 47.469 |
| 29.78 | 0.142 | 29.89 | 0.171 | 29.80 | 0.594 | 29.77 | 1.387 | 29.90 | 2.437 | 29.87 | 18.722 | 29.99 | 47.039 |
| 29.87 | 0.144 | 30.00 | 0.175 | 29.89 | 0.580 | 29.85 | 1.378 | 29.99 | 2.413 | 29.97 | 18.478 | 30.08 | 46.850 |
| 29.97 | 0.141 | 30.10 | 0.170 | 29.99 | 0.586 | 29.97 | 1.367 | 30.09 | 2.394 | 30.06 | 18.278 | 30.18 | 46.298 |
| 30.07 | 0.137 | 30.22 | 0.173 | 30.08 | 0.585 | 30.06 | 1.352 | 30.18 | 2.376 | 30.17 | 18.045 | 30.27 | 46.016 |
| 30.18 | 0.140 | 30.28 | 0.172 | 30.17 | 0.570 | 30.14 | 1.347 | 30.27 | 2.359 | 30.27 | 17.792 | 30.37 | 45.519 |
| 30.26 | 0.141 | 30.38 | 0.174 | 30.28 | 0.568 | 30.24 | 1.329 | 30.38 | 2.338 | 30.37 | 17.635 | 30.46 | 45.303 |
| 30.36 | 0.134 | 30.49 | 0.172 | 30.36 | 0.566 | 30.32 | 1.320 | 30.46 | 2.320 | 30.46 | 17.439 | 30.55 | 44.761 |
| 30.45 | 0.137 | 30.58 | 0.169 | 30.47 | 0.569 | 30.44 | 1.313 | 30.57 | 2.302 | 30.56 | 17.294 | 30.67 | 44.482 |
| 30.53 | 0.140 | 30.69 | 0.168 | 30.56 | 0.559 | 30.53 | 1.301 | 30.66 | 2.286 | 30.65 | 17.126 | 30.75 | 44.054 |
| 30.64 | 0.135 | 30.77 | 0.168 | 30.63 | 0.550 | 30.63 | 1.286 | 30.77 | 2.266 | 30.76 | 16.892 | 30.86 | 43.509 |
| 30.73 | 0.137 | 30.87 | 0.162 | 30.73 | 0.554 | 30.72 | 1.280 | 30.86 | 2.241 | 30.85 | 16.756 | 30.95 | 43.169 |
| 30.83 | 0.133 | 30.98 | 0.162 | 30.84 | 0.541 | 30.83 | 1.267 | 30.96 | 2.229 | 30.95 | 16.618 | 31.04 | 42.683 |
| 30.93 | 0.133 | 31.06 | 0.168 | 30.93 | 0.549 | 30.92 | 1.258 | 31.05 | 2.206 | 31.04 | 16.421 | 31.14 | 42.103 |
| 31.02 | 0.134 | 31.15 | 0.163 | 31.01 | 0.537 | 31.01 | 1.249 | 31.13 | 2.189 | 31.13 | 16.247 | 31.24 | 41.932 |
| 31.11 | 0.132 | 31.27 | 0.163 | 31.12 | 0.540 | 31.09 | 1.244 | 31.24 | 2.168 | 31.23 | 16.079 | 31.33 | 41.692 |
| 31.20 | 0.128 | 31.35 | 0.160 | 31.21 | 0.538 | 31.20 | 1.230 | 31.33 | 2.153 | 31.33 | 15.927 | 31.45 | 41.259 |
| 31.30 | 0.132 | 31.45 | 0.158 | 31.32 | 0.527 | 31.28 | 1.222 | 31.43 | 2.141 | 31.42 | 15.713 | 31.53 | 41.168 |
| 31.39 | 0.131 | 31.53 | 0.156 | 31.41 | 0.526 | 31.38 | 1.208 | 31.54 | 2.119 | 31.52 | 15.625 | 31.64 | 40.857 |
| 31.48 | 0.127 | 31.64 | 0.161 | 31.50 | 0.522 | 31.48 | 1.197 | 31.62 | 2.103 | 31.62 | 15.436 | 31.73 | 40.600 |
| 31.58 | 0.128 | 31.75 | 0.155 | 31.59 | 0.523 | 31.59 | 1.188 | 31.73 | 2.087 | 31.71 | 15.252 | 31.82 | 40.365 |

|       |       |       |       |       |       |       |       |       |       |       |        |       |        |
|-------|-------|-------|-------|-------|-------|-------|-------|-------|-------|-------|--------|-------|--------|
| 31.68 | 0.128 | 31.84 | 0.154 | 31.67 | 0.518 | 31.68 | 1.177 | 31.81 | 2.064 | 31.80 | 15.040 | 31.91 | 40.031 |
| 31.77 | 0.128 | 31.94 | 0.158 | 31.78 | 0.511 | 31.78 | 1.169 | 31.91 | 2.051 | 31.88 | 14.928 | 32.02 | 39.723 |
| 31.87 | 0.125 | 32.03 | 0.156 | 31.87 | 0.515 | 31.85 | 1.166 | 32.01 | 2.040 | 32.01 | 14.778 | 32.10 | 39.415 |
| 31.96 | 0.127 | 32.13 | 0.152 | 31.98 | 0.509 | 31.95 | 1.151 | 32.10 | 2.011 | 32.09 | 14.614 | 32.20 | 39.029 |
| 32.05 | 0.127 | 32.23 | 0.149 | 32.07 | 0.503 | 32.06 | 1.143 | 32.22 | 1.992 | 32.20 | 14.473 | 32.29 | 38.510 |
| 32.15 | 0.126 | 32.31 | 0.153 | 32.18 | 0.504 | 32.14 | 1.137 | 32.30 | 1.982 | 32.29 | 14.340 | 32.40 | 38.200 |
| 32.23 | 0.124 | 32.42 | 0.151 | 32.25 | 0.501 | 32.24 | 1.125 | 32.40 | 1.964 | 32.39 | 14.228 | 32.50 | 37.963 |
| 32.34 | 0.125 | 32.51 | 0.150 | 32.33 | 0.500 | 32.33 | 1.119 | 32.51 | 1.946 | 32.48 | 14.021 | 32.61 | 37.537 |
| 32.43 | 0.122 | 32.61 | 0.146 | 32.44 | 0.489 | 32.44 | 1.107 | 32.61 | 1.930 | 32.58 | 13.954 | 32.69 | 37.133 |
| 32.53 | 0.123 | 32.72 | 0.151 | 32.52 | 0.485 | 32.52 | 1.105 | 32.70 | 1.917 | 32.68 | 13.820 | 32.79 | 36.921 |
| 32.63 | 0.121 | 32.81 | 0.146 | 32.61 | 0.478 | 32.61 | 1.087 | 32.78 | 1.903 | 32.79 | 13.670 | 32.89 | 36.593 |
| 32.71 | 0.124 | 32.89 | 0.142 | 32.74 | 0.483 | 32.72 | 1.081 | 32.88 | 1.886 | 32.87 | 13.521 | 32.97 | 36.316 |
| 32.82 | 0.120 | 32.99 | 0.147 | 32.82 | 0.480 | 32.79 | 1.073 | 32.97 | 1.873 | 32.98 | 13.430 | 33.07 | 35.844 |
| 32.91 | 0.119 | 33.11 | 0.149 | 32.91 | 0.472 | 32.91 | 1.066 | 33.07 | 1.862 | 33.07 | 13.264 | 33.17 | 35.486 |
| 33.01 | 0.118 | 33.19 | 0.149 | 32.99 | 0.472 | 33.00 | 1.055 | 33.17 | 1.843 | 33.17 | 13.133 | 33.26 | 35.143 |
| 33.10 | 0.122 | 33.28 | 0.146 | 33.10 | 0.463 | 33.08 | 1.052 | 33.28 | 1.833 | 33.26 | 13.062 | 33.37 | 34.738 |
| 33.19 | 0.125 | 33.38 | 0.144 | 33.19 | 0.461 | 33.18 | 1.039 | 33.37 | 1.811 | 33.36 | 12.879 | 33.47 | 34.333 |
| 33.29 | 0.121 | 33.49 | 0.144 | 33.28 | 0.462 | 33.27 | 1.037 | 33.47 | 1.805 | 33.44 | 12.774 | 33.56 | 34.015 |
| 33.40 | 0.118 | 33.57 | 0.143 | 33.38 | 0.455 | 33.38 | 1.028 | 33.56 | 1.792 | 33.54 | 12.601 | 33.66 | 33.739 |
| 33.49 | 0.117 | 33.68 | 0.141 | 33.49 | 0.457 | 33.46 | 1.021 | 33.66 | 1.773 | 33.65 | 12.489 | 33.77 | 33.404 |
| 33.58 | 0.118 | 33.76 | 0.137 | 33.58 | 0.450 | 33.56 | 1.010 | 33.75 | 1.755 | 33.73 | 12.363 | 33.86 | 33.174 |
| 33.66 | 0.113 | 33.84 | 0.141 | 33.67 | 0.450 | 33.64 | 1.002 | 33.83 | 1.743 | 33.84 | 12.255 | 33.95 | 33.033 |
| 33.74 | 0.116 | 33.95 | 0.135 | 33.78 | 0.449 | 33.73 | 0.995 | 33.94 | 1.728 | 33.95 | 12.100 | 34.04 | 32.766 |
| 33.86 | 0.114 | 34.07 | 0.139 | 33.88 | 0.435 | 33.83 | 0.987 | 34.05 | 1.712 | 34.03 | 11.986 | 34.15 | 32.504 |
| 33.95 | 0.116 | 34.14 | 0.135 | 33.98 | 0.436 | 33.93 | 0.979 | 34.15 | 1.696 | 34.13 | 11.846 | 34.22 | 32.460 |
| 34.04 | 0.115 | 34.24 | 0.133 | 34.05 | 0.431 | 34.03 | 0.974 | 34.25 | 1.689 | 34.22 | 11.754 | 34.33 | 32.074 |
| 34.13 | 0.113 | 34.34 | 0.138 | 34.15 | 0.433 | 34.12 | 0.966 | 34.33 | 1.674 | 34.33 | 11.592 | 34.43 | 31.742 |
| 34.23 | 0.118 | 34.45 | 0.133 | 34.25 | 0.424 | 34.21 | 0.960 | 34.43 | 1.667 | 34.41 | 11.487 | 34.53 | 31.413 |
| 34.31 | 0.116 | 34.55 | 0.135 | 34.34 | 0.425 | 34.31 | 0.953 | 34.53 | 1.653 | 34.52 | 11.397 | 34.63 | 31.197 |
| 34.42 | 0.113 | 34.62 | 0.130 | 34.43 | 0.417 | 34.40 | 0.942 | 34.62 | 1.637 | 34.61 | 11.270 | 34.71 | 30.853 |
| 34.52 | 0.113 | 34.74 | 0.133 | 34.51 | 0.424 | 34.49 | 0.936 | 34.73 | 1.628 | 34.72 | 11.178 | 34.81 | 30.656 |
| 34.60 | 0.111 | 34.83 | 0.129 | 34.63 | 0.421 | 34.59 | 0.932 | 34.82 | 1.608 | 34.80 | 11.060 | 34.91 | 30.236 |
| 34.71 | 0.111 | 34.93 | 0.135 | 34.72 | 0.418 | 34.68 | 0.922 | 34.90 | 1.598 | 34.91 | 10.938 | 35.00 | 29.998 |
| 34.81 | 0.115 | 35.03 | 0.133 | 34.80 | 0.419 | 34.79 | 0.916 | 35.01 | 1.586 | 35.00 | 10.824 | 35.11 | 29.736 |
| 34.90 | 0.112 | 35.13 | 0.131 | 34.90 | 0.409 | 34.89 | 0.908 | 35.11 | 1.578 | 35.09 | 10.697 | 35.20 | 29.422 |
| 34.99 | 0.112 | 35.21 | 0.131 | 34.98 | 0.410 | 34.96 | 0.902 | 35.21 | 1.559 | 35.20 | 10.582 | 35.29 | 29.089 |
| 35.08 | 0.112 | 35.34 | 0.129 | 35.10 | 0.403 | 35.07 | 0.899 | 35.30 | 1.548 | 35.29 | 10.490 | 35.39 | 28.806 |
| 35.18 | 0.111 | 35.43 | 0.130 | 35.18 | 0.402 | 35.14 | 0.893 | 35.41 | 1.536 | 35.38 | 10.393 | 35.50 | 28.530 |
| 35.27 | 0.110 | 35.51 | 0.128 | 35.27 | 0.401 | 35.25 | 0.883 | 35.48 | 1.528 | 35.47 | 10.309 | 35.59 | 28.238 |
| 35.37 | 0.109 | 35.61 | 0.126 | 35.37 | 0.399 | 35.35 | 0.877 | 35.59 | 1.512 | 35.59 | 10.210 | 35.69 | 27.835 |
| 35.45 | 0.113 | 35.70 | 0.129 | 35.45 | 0.398 | 35.44 | 0.872 | 35.69 | 1.498 | 35.68 | 10.107 | 35.77 | 27.624 |
| 35.55 | 0.109 | 35.80 | 0.125 | 35.57 | 0.392 | 35.54 | 0.865 | 35.78 | 1.489 | 35.77 | 10.013 | 35.87 | 27.412 |

|       |       |       |       |       |       |       |       |       |       |       |       |       |        |
|-------|-------|-------|-------|-------|-------|-------|-------|-------|-------|-------|-------|-------|--------|
| 35.65 | 0.108 | 35.92 | 0.126 | 35.67 | 0.388 | 35.62 | 0.861 | 35.88 | 1.478 | 35.87 | 9.899 | 35.98 | 27.241 |
| 35.75 | 0.105 | 35.99 | 0.122 | 35.75 | 0.388 | 35.74 | 0.856 | 35.97 | 1.466 | 35.97 | 9.833 | 36.08 | 26.934 |
| 35.85 | 0.113 | 36.09 | 0.126 | 35.85 | 0.390 | 35.83 | 0.843 | 36.08 | 1.461 | 36.06 | 9.710 | 36.16 | 26.812 |
| 35.92 | 0.107 | 36.19 | 0.124 | 35.94 | 0.384 | 35.92 | 0.842 | 36.17 | 1.442 | 36.16 | 9.619 | 36.28 | 26.556 |
| 36.02 | 0.104 | 36.28 | 0.123 | 36.02 | 0.386 | 36.00 | 0.831 | 36.26 | 1.433 | 36.26 | 9.543 | 36.36 | 26.437 |
| 36.11 | 0.108 | 36.39 | 0.120 | 36.14 | 0.379 | 36.13 | 0.825 | 36.37 | 1.425 | 36.36 | 9.439 | 36.45 | 26.112 |
| 36.20 | 0.108 | 36.48 | 0.127 | 36.23 | 0.375 | 36.19 | 0.821 | 36.48 | 1.412 | 36.44 | 9.321 | 36.57 | 25.950 |
| 36.30 | 0.104 | 36.57 | 0.124 | 36.32 | 0.374 | 36.30 | 0.814 | 36.56 | 1.408 | 36.54 | 9.240 | 36.64 | 25.638 |
| 36.39 | 0.106 | 36.66 | 0.122 | 36.41 | 0.372 | 36.40 | 0.808 | 36.64 | 1.390 | 36.65 | 9.176 | 36.76 | 25.448 |
| 36.49 | 0.105 | 36.78 | 0.123 | 36.50 | 0.371 | 36.50 | 0.805 | 36.76 | 1.380 | 36.75 | 9.092 | 36.85 | 25.188 |
| 36.58 | 0.104 | 36.86 | 0.118 | 36.59 | 0.366 | 36.58 | 0.797 | 36.84 | 1.371 | 36.83 | 9.010 | 36.94 | 24.892 |
| 36.67 | 0.104 | 36.96 | 0.120 | 36.71 | 0.364 | 36.68 | 0.789 | 36.95 | 1.356 | 36.95 | 8.896 | 37.03 | 24.745 |
| 36.77 | 0.106 | 37.05 | 0.118 | 36.80 | 0.368 | 36.76 | 0.788 | 37.03 | 1.349 | 37.04 | 8.798 | 37.12 | 24.446 |
| 36.87 | 0.103 | 37.14 | 0.118 | 36.88 | 0.361 | 36.86 | 0.778 | 37.14 | 1.342 | 37.12 | 8.727 | 37.22 | 24.265 |
| 36.95 | 0.102 | 37.24 | 0.117 | 36.98 | 0.356 | 36.96 | 0.771 | 37.22 | 1.333 | 37.24 | 8.662 | 37.33 | 24.080 |
| 37.05 | 0.105 | 37.33 | 0.116 | 37.07 | 0.356 | 37.05 | 0.770 | 37.33 | 1.317 | 37.31 | 8.590 | 37.41 | 23.738 |
| 37.13 | 0.101 | 37.43 | 0.113 | 37.18 | 0.353 | 37.14 | 0.765 | 37.42 | 1.310 | 37.42 | 8.479 | 37.51 | 23.613 |
| 37.23 | 0.104 | 37.54 | 0.113 | 37.27 | 0.355 | 37.24 | 0.758 | 37.50 | 1.296 | 37.51 | 8.397 | 37.60 | 23.270 |
| 37.33 | 0.102 | 37.62 | 0.114 | 37.36 | 0.353 | 37.34 | 0.753 | 37.62 | 1.288 | 37.60 | 8.308 | 37.72 | 23.005 |
| 37.41 | 0.101 | 37.73 | 0.114 | 37.47 | 0.350 | 37.43 | 0.748 | 37.71 | 1.280 | 37.71 | 8.234 | 37.81 | 22.828 |
| 37.52 | 0.096 | 37.83 | 0.116 | 37.57 | 0.343 | 37.52 | 0.740 | 37.81 | 1.268 | 37.79 | 8.156 | 37.90 | 22.590 |
| 37.61 | 0.099 | 37.92 | 0.115 | 37.65 | 0.344 | 37.61 | 0.739 | 37.91 | 1.260 | 37.89 | 8.056 | 37.99 | 22.459 |
| 37.70 | 0.100 | 38.03 | 0.115 | 37.75 | 0.345 | 37.69 | 0.733 | 37.99 | 1.248 | 37.98 | 7.995 | 38.10 | 22.245 |
| 37.80 | 0.099 | 38.13 | 0.113 | 37.83 | 0.340 | 37.80 | 0.731 | 38.08 | 1.242 | 38.09 | 7.913 | 38.20 | 22.113 |
| 37.90 | 0.097 | 38.20 | 0.112 | 37.94 | 0.341 | 37.90 | 0.723 | 38.20 | 1.230 | 38.18 | 7.844 | 38.29 | 21.997 |
| 37.98 | 0.099 | 38.30 | 0.114 | 38.02 | 0.337 | 37.98 | 0.717 | 38.30 | 1.222 | 38.28 | 7.773 | 38.40 | 21.731 |
| 38.09 | 0.104 | 38.41 | 0.114 | 38.12 | 0.333 | 38.08 | 0.710 | 38.39 | 1.212 | 38.38 | 7.691 | 38.48 | 21.605 |
| 38.16 | 0.101 | 38.49 | 0.110 | 38.19 | 0.332 | 38.19 | 0.707 | 38.48 | 1.209 | 38.47 | 7.608 | 38.59 | 21.339 |
| 38.26 | 0.096 | 38.59 | 0.112 | 38.31 | 0.327 | 38.27 | 0.700 | 38.59 | 1.197 | 38.56 | 7.537 | 38.68 | 21.161 |
| 38.37 | 0.096 | 38.69 | 0.105 | 38.39 | 0.331 | 38.37 | 0.692 | 38.68 | 1.188 | 38.67 | 7.471 | 38.76 | 20.914 |
| 38.46 | 0.096 | 38.79 | 0.106 | 38.50 | 0.325 | 38.45 | 0.694 | 38.79 | 1.174 | 38.76 | 7.401 | 38.87 | 20.739 |
| 38.53 | 0.102 | 38.88 | 0.107 | 38.57 | 0.325 | 38.55 | 0.689 | 38.88 | 1.170 | 38.86 | 7.333 | 38.97 | 20.492 |
| 38.66 | 0.096 | 38.99 | 0.109 | 38.68 | 0.320 | 38.64 | 0.685 | 38.96 | 1.160 | 38.95 | 7.247 | 39.06 | 20.290 |
| 38.74 | 0.095 | 39.08 | 0.110 | 38.77 | 0.317 | 38.75 | 0.682 | 39.06 | 1.154 | 39.07 | 7.203 | 39.17 | 20.086 |
| 38.83 | 0.100 | 39.19 | 0.105 | 38.87 | 0.319 | 38.83 | 0.676 | 39.16 | 1.143 | 39.14 | 7.136 | 39.26 | 19.881 |
| 38.93 | 0.096 | 39.27 | 0.108 | 38.97 | 0.311 | 38.94 | 0.672 | 39.28 | 1.136 | 39.27 | 7.049 | 39.36 | 19.676 |
| 39.01 | 0.095 | 39.38 | 0.107 | 39.05 | 0.311 | 39.01 | 0.662 | 39.36 | 1.123 | 39.35 | 7.001 | 39.46 | 19.468 |
| 39.12 | 0.093 | 39.48 | 0.105 | 39.13 | 0.309 | 39.12 | 0.663 | 39.45 | 1.121 | 39.45 | 6.939 | 39.56 | 19.349 |
| 39.21 | 0.092 | 39.58 | 0.109 | 39.24 | 0.307 | 39.20 | 0.658 | 39.56 | 1.112 | 39.54 | 6.881 | 39.65 | 19.176 |
| 39.31 | 0.095 | 39.66 | 0.103 | 39.33 | 0.305 | 39.29 | 0.649 | 39.65 | 1.099 | 39.63 | 6.794 | 39.74 | 19.015 |
| 39.39 | 0.094 | 39.74 | 0.108 | 39.43 | 0.304 | 39.39 | 0.647 | 39.74 | 1.095 | 39.73 | 6.730 | 39.81 | 18.864 |
| 39.49 | 0.094 | 39.85 | 0.106 | 39.53 | 0.303 | 39.49 | 0.643 | 39.83 | 1.086 | 39.81 | 6.661 | 39.93 | 18.737 |

|       |       |       |       |       |       |       |       |       |       |       |       |       |        |
|-------|-------|-------|-------|-------|-------|-------|-------|-------|-------|-------|-------|-------|--------|
| 39.60 | 0.097 | 39.96 | 0.102 | 39.62 | 0.301 | 39.57 | 0.633 | 39.94 | 1.077 | 39.92 | 6.610 | 40.02 | 18.634 |
| 39.68 | 0.094 | 40.04 | 0.102 | 39.70 | 0.298 | 39.67 | 0.634 | 40.02 | 1.070 | 40.01 | 6.541 | 40.12 | 18.384 |
| 39.79 | 0.093 | 40.13 | 0.104 | 39.81 | 0.295 | 39.77 | 0.631 | 40.13 | 1.064 | 40.11 | 6.477 | 40.23 | 18.220 |
| 39.88 | 0.091 | 40.23 | 0.103 | 39.90 | 0.296 | 39.86 | 0.624 | 40.21 | 1.058 | 40.21 | 6.432 | 40.32 | 18.069 |
| 39.97 | 0.094 | 40.34 | 0.103 | 40.00 | 0.295 | 39.96 | 0.623 | 40.32 | 1.050 | 40.30 | 6.365 | 40.41 | 17.918 |
| 40.08 | 0.092 | 40.43 | 0.100 | 40.08 | 0.289 | 40.05 | 0.618 | 40.40 | 1.038 | 40.41 | 6.331 | 40.49 | 17.714 |
| 40.17 | 0.093 | 40.54 | 0.103 | 40.17 | 0.292 | 40.14 | 0.615 | 40.51 | 1.031 | 40.51 | 6.228 | 40.60 | 17.570 |
| 40.28 | 0.091 | 40.62 | 0.102 | 40.25 | 0.289 | 40.25 | 0.608 | 40.60 | 1.029 | 40.59 | 6.183 | 40.71 | 17.397 |
| 40.35 | 0.092 | 40.71 | 0.098 | 40.37 | 0.290 | 40.34 | 0.604 | 40.70 | 1.017 | 40.69 | 6.143 | 40.80 | 17.166 |
| 40.45 | 0.092 | 40.81 | 0.104 | 40.47 | 0.286 | 40.42 | 0.604 | 40.79 | 1.009 | 40.80 | 6.068 | 40.90 | 16.972 |
| 40.54 | 0.089 | 40.90 | 0.099 | 40.55 | 0.283 | 40.52 | 0.598 | 40.89 | 1.001 | 40.89 | 6.026 | 40.99 | 16.810 |
| 40.63 | 0.088 | 41.01 | 0.100 | 40.65 | 0.281 | 40.62 | 0.593 | 40.98 | 0.993 | 40.98 | 5.964 | 41.10 | 16.676 |
| 40.74 | 0.094 | 41.10 | 0.104 | 40.76 | 0.279 | 40.70 | 0.593 | 41.07 | 0.986 | 41.09 | 5.906 | 41.20 | 16.495 |
| 40.84 | 0.090 | 41.20 | 0.096 | 40.84 | 0.281 | 40.81 | 0.584 | 41.18 | 0.980 | 41.18 | 5.853 | 41.28 | 16.420 |
| 40.93 | 0.085 | 41.30 | 0.098 | 40.92 | 0.279 | 40.88 | 0.584 | 41.28 | 0.976 | 41.28 | 5.781 | 41.38 | 16.244 |
| 41.02 | 0.086 | 41.41 | 0.097 | 41.01 | 0.275 | 40.99 | 0.579 | 41.37 | 0.963 | 41.37 | 5.753 | 41.48 | 16.157 |
| 41.13 | 0.092 | 41.49 | 0.098 | 41.14 | 0.275 | 41.08 | 0.574 | 41.46 | 0.958 | 41.46 | 5.686 | 41.58 | 16.012 |
| 41.20 | 0.085 | 41.59 | 0.096 | 41.23 | 0.273 | 41.18 | 0.576 | 41.56 | 0.953 | 41.57 | 5.631 | 41.69 | 15.858 |
| 41.30 | 0.088 | 41.68 | 0.097 | 41.31 | 0.271 | 41.27 | 0.568 | 41.65 | 0.943 | 41.65 | 5.588 | 41.78 | 15.718 |
| 41.40 | 0.089 | 41.77 | 0.099 | 41.40 | 0.267 | 41.36 | 0.560 | 41.77 | 0.935 | 41.74 | 5.543 | 41.86 | 15.573 |
| 41.50 | 0.086 | 41.88 | 0.093 | 41.50 | 0.268 | 41.45 | 0.556 | 41.85 | 0.933 | 41.85 | 5.499 | 41.97 | 15.426 |
| 41.59 | 0.085 | 41.98 | 0.097 | 41.59 | 0.270 | 41.55 | 0.557 | 41.96 | 0.924 | 41.96 | 5.442 | 42.05 | 15.303 |
| 41.69 | 0.087 | 42.06 | 0.099 | 41.68 | 0.269 | 41.63 | 0.549 | 42.05 | 0.922 | 42.04 | 5.376 | 42.14 | 15.164 |
| 41.78 | 0.085 | 42.16 | 0.095 | 41.79 | 0.262 | 41.73 | 0.544 | 42.16 | 0.912 | 42.15 | 5.346 | 42.24 | 15.116 |
| 41.87 | 0.087 | 42.26 | 0.094 | 41.88 | 0.262 | 41.82 | 0.543 | 42.24 | 0.901 | 42.22 | 5.285 | 42.35 | 14.854 |
| 41.96 | 0.091 | 42.36 | 0.095 | 41.97 | 0.260 | 41.93 | 0.538 | 42.34 | 0.896 | 42.32 | 5.245 | 42.44 | 14.740 |
| 42.04 | 0.087 | 42.45 | 0.096 | 42.07 | 0.256 | 42.01 | 0.536 | 42.43 | 0.893 | 42.43 | 5.178 | 42.52 | 14.594 |
| 42.14 | 0.085 | 42.55 | 0.091 | 42.17 | 0.256 | 42.11 | 0.533 | 42.55 | 0.887 | 42.53 | 5.134 | 42.63 | 14.414 |
| 42.26 | 0.083 | 42.64 | 0.096 | 42.25 | 0.254 | 42.20 | 0.530 | 42.63 | 0.882 | 42.62 | 5.097 | 42.73 | 14.314 |
| 42.34 | 0.086 | 42.75 | 0.090 | 42.36 | 0.253 | 42.29 | 0.526 | 42.73 | 0.876 | 42.72 | 5.054 | 42.84 | 14.176 |
| 42.43 | 0.083 | 42.84 | 0.095 | 42.43 | 0.251 | 42.39 | 0.522 | 42.83 | 0.871 | 42.81 | 4.997 | 42.92 | 14.044 |
| 42.53 | 0.087 | 42.91 | 0.089 | 42.54 | 0.249 | 42.49 | 0.519 | 42.92 | 0.863 | 42.91 | 4.966 | 43.02 | 13.928 |
| 42.62 | 0.085 | 43.02 | 0.093 | 42.62 | 0.244 | 42.59 | 0.516 | 43.02 | 0.856 | 43.00 | 4.908 | 43.12 | 13.883 |
| 42.72 | 0.085 | 43.11 | 0.091 | 42.72 | 0.247 | 42.68 | 0.513 | 43.11 | 0.849 | 43.11 | 4.871 | 43.21 | 13.758 |
| 42.80 | 0.087 | 43.22 | 0.090 | 42.81 | 0.244 | 42.76 | 0.514 | 43.21 | 0.847 | 43.19 | 4.823 | 43.31 | 13.612 |
| 42.91 | 0.084 | 43.31 | 0.092 | 42.91 | 0.244 | 42.87 | 0.509 | 43.30 | 0.837 | 43.29 | 4.768 | 43.43 | 13.528 |
| 43.02 | 0.085 | 43.42 | 0.086 | 43.00 | 0.244 | 42.96 | 0.502 | 43.40 | 0.832 | 43.39 | 4.747 | 43.50 | 13.334 |
| 43.10 | 0.085 | 43.51 | 0.089 | 43.08 | 0.242 | 43.05 | 0.501 | 43.51 | 0.828 | 43.49 | 4.696 | 43.59 | 13.252 |
| 43.18 | 0.086 | 43.61 | 0.089 | 43.19 | 0.238 | 43.15 | 0.499 | 43.59 | 0.824 | 43.58 | 4.655 | 43.70 | 13.143 |
| 43.28 | 0.084 | 43.70 | 0.088 | 43.29 | 0.240 | 43.25 | 0.492 | 43.68 | 0.817 | 43.69 | 4.620 | 43.78 | 12.999 |
| 43.37 | 0.085 | 43.80 | 0.088 | 43.39 | 0.238 | 43.35 | 0.490 | 43.77 | 0.811 | 43.77 | 4.567 | 43.89 | 12.893 |
| 43.47 | 0.083 | 43.90 | 0.092 | 43.49 | 0.236 | 43.44 | 0.488 | 43.88 | 0.801 | 43.88 | 4.524 | 44.01 | 12.718 |

|       |       |       |       |       |       |       |       |       |       |       |       |       |        |
|-------|-------|-------|-------|-------|-------|-------|-------|-------|-------|-------|-------|-------|--------|
| 43.57 | 0.084 | 44.01 | 0.091 | 43.57 | 0.232 | 43.53 | 0.482 | 43.97 | 0.802 | 43.98 | 4.489 | 44.07 | 12.639 |
| 43.67 | 0.084 | 44.08 | 0.088 | 43.68 | 0.233 | 43.64 | 0.481 | 44.07 | 0.798 | 44.06 | 4.450 | 44.18 | 12.513 |
| 43.74 | 0.082 | 44.18 | 0.086 | 43.78 | 0.234 | 43.73 | 0.477 | 44.16 | 0.787 | 44.17 | 4.410 | 44.27 | 12.374 |
| 43.85 | 0.085 | 44.28 | 0.086 | 43.87 | 0.229 | 43.83 | 0.475 | 44.28 | 0.787 | 44.27 | 4.361 | 44.37 | 12.283 |
| 43.93 | 0.078 | 44.36 | 0.084 | 43.96 | 0.229 | 43.91 | 0.470 | 44.37 | 0.775 | 44.35 | 4.328 | 44.45 | 12.190 |
| 44.03 | 0.081 | 44.46 | 0.084 | 44.03 | 0.228 | 44.02 | 0.470 | 44.47 | 0.771 | 44.46 | 4.291 | 44.56 | 12.105 |
| 44.13 | 0.080 | 44.57 | 0.085 | 44.13 | 0.228 | 44.11 | 0.466 | 44.55 | 0.767 | 44.56 | 4.248 | 44.65 | 11.981 |
| 44.23 | 0.077 | 44.67 | 0.083 | 44.23 | 0.224 | 44.20 | 0.462 | 44.64 | 0.762 | 44.64 | 4.225 | 44.76 | 11.868 |
| 44.32 | 0.082 | 44.77 | 0.086 | 44.33 | 0.225 | 44.28 | 0.460 | 44.75 | 0.757 | 44.74 | 4.183 | 44.85 | 11.794 |
| 44.41 | 0.081 | 44.86 | 0.081 | 44.43 | 0.220 | 44.39 | 0.460 | 44.84 | 0.750 | 44.85 | 4.148 | 44.95 | 11.700 |
| 44.52 | 0.082 | 44.96 | 0.085 | 44.52 | 0.221 | 44.47 | 0.456 | 44.96 | 0.744 | 44.93 | 4.112 | 45.05 | 11.584 |
| 44.61 | 0.079 | 45.05 | 0.084 | 44.60 | 0.220 | 44.57 | 0.452 | 45.04 | 0.740 | 45.05 | 4.068 | 45.15 | 11.455 |
| 44.71 | 0.081 | 45.16 | 0.090 | 44.72 | 0.220 | 44.67 | 0.448 | 45.14 | 0.734 | 45.15 | 4.030 | 45.23 | 11.364 |
| 44.80 | 0.078 | 45.25 | 0.080 | 44.81 | 0.215 | 44.77 | 0.447 | 45.24 | 0.730 | 45.22 | 4.006 | 45.34 | 11.249 |
| 44.90 | 0.080 | 45.34 | 0.087 | 44.89 | 0.215 | 44.86 | 0.444 | 45.34 | 0.723 | 45.31 | 3.969 | 45.42 | 11.167 |
| 44.99 | 0.078 | 45.44 | 0.087 | 45.03 | 0.214 | 44.95 | 0.445 | 45.42 | 0.724 | 45.42 | 3.922 | 45.52 | 11.069 |
| 45.09 | 0.076 | 45.53 | 0.083 | 45.09 | 0.213 | 45.04 | 0.435 | 45.50 | 0.716 | 45.53 | 3.886 | 45.61 | 10.915 |
| 45.18 | 0.080 | 45.63 | 0.084 | 45.20 | 0.214 | 45.13 | 0.433 | 45.62 | 0.714 | 45.60 | 3.872 | 45.71 | 10.844 |
| 45.25 | 0.082 | 45.72 | 0.085 | 45.28 | 0.213 | 45.23 | 0.430 | 45.71 | 0.707 | 45.72 | 3.831 | 45.82 | 10.756 |
| 45.36 | 0.080 | 45.82 | 0.080 | 45.40 | 0.211 | 45.33 | 0.430 | 45.80 | 0.705 | 45.81 | 3.797 | 45.91 | 10.635 |
| 45.45 | 0.079 | 45.93 | 0.084 | 45.49 | 0.208 | 45.43 | 0.428 | 45.90 | 0.697 | 45.89 | 3.752 | 46.01 | 10.546 |
| 45.54 | 0.080 | 46.01 | 0.084 | 45.58 | 0.210 | 45.51 | 0.423 | 46.00 | 0.692 | 46.00 | 3.730 | 46.12 | 10.462 |
| 45.63 | 0.075 | 46.13 | 0.078 | 45.67 | 0.206 | 45.62 | 0.423 | 46.09 | 0.687 | 46.08 | 3.699 | 46.21 | 10.364 |
| 45.74 | 0.081 | 46.21 | 0.079 | 45.77 | 0.205 | 45.72 | 0.416 | 46.20 | 0.682 | 46.18 | 3.665 | 46.30 | 10.246 |
| 45.83 | 0.078 | 46.31 | 0.080 | 45.85 | 0.206 | 45.81 | 0.418 | 46.29 | 0.678 | 46.27 | 3.628 | 46.42 | 10.200 |
| 45.93 | 0.081 | 46.40 | 0.078 | 45.96 | 0.202 | 45.90 | 0.413 | 46.39 | 0.671 | 46.37 | 3.594 | 46.50 | 10.151 |
| 46.02 | 0.080 | 46.50 | 0.075 | 46.05 | 0.203 | 45.99 | 0.413 | 46.48 | 0.670 | 46.48 | 3.569 | 46.60 | 10.033 |
| 46.12 | 0.080 | 46.60 | 0.078 | 46.13 | 0.199 | 46.08 | 0.408 | 46.59 | 0.667 | 46.56 | 3.545 | 46.69 | 9.979  |
| 46.21 | 0.081 | 46.70 | 0.081 | 46.24 | 0.202 | 46.17 | 0.408 | 46.67 | 0.659 | 46.68 | 3.514 | 46.79 | 9.854  |
| 46.30 | 0.079 | 46.81 | 0.080 | 46.30 | 0.200 | 46.27 | 0.405 | 46.76 | 0.657 | 46.76 | 3.474 | 46.88 | 9.778  |
| 46.40 | 0.074 | 46.90 | 0.078 | 46.43 | 0.199 | 46.35 | 0.403 | 46.88 | 0.651 | 46.87 | 3.451 | 46.98 | 9.682  |
| 46.49 | 0.074 | 46.99 | 0.076 | 46.52 | 0.199 | 46.46 | 0.399 | 46.96 | 0.648 | 46.95 | 3.418 | 47.08 | 9.602  |
| 46.59 | 0.078 | 47.07 | 0.081 | 46.62 | 0.198 | 46.57 | 0.394 | 47.07 | 0.645 | 47.04 | 3.390 | 47.17 | 9.499  |
| 46.68 | 0.076 | 47.18 | 0.077 | 46.71 | 0.195 | 46.66 | 0.394 | 47.15 | 0.642 | 47.14 | 3.366 | 47.25 | 9.416  |
| 46.79 | 0.074 | 47.28 | 0.075 | 46.80 | 0.198 | 46.76 | 0.393 | 47.26 | 0.638 | 47.24 | 3.340 | 47.37 | 9.345  |
| 46.88 | 0.071 | 47.37 | 0.078 | 46.90 | 0.194 | 46.87 | 0.388 | 47.33 | 0.630 | 47.35 | 3.300 | 47.46 | 9.269  |
| 46.97 | 0.080 | 47.47 | 0.079 | 46.96 | 0.194 | 46.95 | 0.387 | 47.43 | 0.623 | 47.43 | 3.265 | 47.56 | 9.202  |
| 47.05 | 0.078 | 47.56 | 0.078 | 47.08 | 0.194 | 47.04 | 0.382 | 47.55 | 0.621 | 47.53 | 3.259 | 47.64 | 9.099  |
| 47.15 | 0.080 | 47.65 | 0.075 | 47.17 | 0.192 | 47.14 | 0.383 | 47.64 | 0.619 | 47.62 | 3.224 | 47.74 | 8.970  |
| 47.22 | 0.079 | 47.77 | 0.073 | 47.27 | 0.194 | 47.23 | 0.382 | 47.73 | 0.611 | 47.73 | 3.192 | 47.85 | 8.934  |
| 47.35 | 0.074 | 47.85 | 0.077 | 47.36 | 0.192 | 47.33 | 0.379 | 47.83 | 0.610 | 47.83 | 3.170 | 47.95 | 8.839  |
| 47.45 | 0.076 | 47.95 | 0.079 | 47.44 | 0.190 | 47.42 | 0.374 | 47.93 | 0.609 | 47.92 | 3.148 | 48.04 | 8.773  |

|       |       |       |       |       |       |       |       |       |       |       |       |       |       |
|-------|-------|-------|-------|-------|-------|-------|-------|-------|-------|-------|-------|-------|-------|
| 47.53 | 0.071 | 48.04 | 0.075 | 47.55 | 0.185 | 47.52 | 0.374 | 48.03 | 0.601 | 48.00 | 3.125 | 48.13 | 8.700 |
| 47.62 | 0.071 | 48.15 | 0.073 | 47.63 | 0.189 | 47.62 | 0.372 | 48.13 | 0.598 | 48.11 | 3.087 | 48.23 | 8.635 |
| 47.71 | 0.074 | 48.24 | 0.078 | 47.72 | 0.187 | 47.70 | 0.368 | 48.22 | 0.593 | 48.21 | 3.058 | 48.32 | 8.569 |
| 47.81 | 0.075 | 48.35 | 0.075 | 47.85 | 0.185 | 47.80 | 0.368 | 48.33 | 0.589 | 48.31 | 3.029 | 48.41 | 8.510 |
| 47.90 | 0.076 | 48.43 | 0.078 | 47.92 | 0.187 | 47.87 | 0.366 | 48.41 | 0.592 | 48.38 | 3.002 | 48.52 | 8.448 |
| 47.99 | 0.074 | 48.53 | 0.074 | 48.02 | 0.183 | 47.97 | 0.362 | 48.52 | 0.585 | 48.49 | 2.988 | 48.62 | 8.326 |
| 48.10 | 0.071 | 48.63 | 0.072 | 48.11 | 0.182 | 48.07 | 0.363 | 48.60 | 0.580 | 48.58 | 2.970 | 48.70 | 8.268 |
| 48.18 | 0.074 | 48.71 | 0.072 | 48.21 | 0.182 | 48.17 | 0.360 | 48.69 | 0.575 | 48.69 | 2.935 | 48.81 | 8.202 |
| 48.28 | 0.072 | 48.81 | 0.075 | 48.30 | 0.183 | 48.26 | 0.357 | 48.79 | 0.573 | 48.77 | 2.915 | 48.90 | 8.144 |
| 48.39 | 0.073 | 48.94 | 0.075 | 48.38 | 0.181 | 48.36 | 0.352 | 48.89 | 0.566 | 48.88 | 2.892 | 49.00 | 8.062 |
| 48.48 | 0.079 | 49.00 | 0.075 | 48.49 | 0.179 | 48.45 | 0.354 | 49.00 | 0.564 | 48.96 | 2.863 | 49.08 | 7.973 |
| 48.57 | 0.076 | 49.11 | 0.076 | 48.56 | 0.177 | 48.55 | 0.348 | 49.09 | 0.559 | 49.07 | 2.838 | 49.19 | 7.925 |
| 48.67 | 0.070 | 49.20 | 0.074 | 48.67 | 0.176 | 48.64 | 0.350 | 49.17 | 0.557 | 49.15 | 2.818 | 49.26 | 7.860 |
| 48.76 | 0.070 | 49.29 | 0.073 | 48.76 | 0.177 | 48.72 | 0.344 | 49.27 | 0.554 | 49.27 | 2.787 | 49.38 | 7.768 |
| 48.87 | 0.070 | 49.38 | 0.072 | 48.85 | 0.174 | 48.81 | 0.345 | 49.37 | 0.552 | 49.35 | 2.770 | 49.47 | 7.724 |
| 48.96 | 0.074 | 49.50 | 0.073 | 48.95 | 0.172 | 48.89 | 0.342 | 49.46 | 0.543 | 49.46 | 2.750 | 49.58 | 7.649 |
| 49.05 | 0.074 | 49.58 | 0.072 | 49.04 | 0.174 | 49.00 | 0.343 | 49.56 | 0.542 | 49.56 | 2.725 | 49.66 | 7.584 |
| 49.15 | 0.070 | 49.68 | 0.069 | 49.14 | 0.171 | 49.10 | 0.338 | 49.65 | 0.543 | 49.66 | 2.701 | 49.77 | 7.531 |
| 49.24 | 0.072 | 49.78 | 0.072 | 49.23 | 0.172 | 49.20 | 0.334 | 49.77 | 0.537 | 49.74 | 2.678 | 49.87 | 7.465 |
| 49.34 | 0.076 | 49.86 | 0.066 | 49.32 | 0.170 | 49.28 | 0.336 | 49.86 | 0.537 | 49.85 | 2.658 | 49.95 | 7.404 |
| 49.43 | 0.067 | 49.96 | 0.070 | 49.43 | 0.167 | 49.39 | 0.334 | 49.96 | 0.528 | 49.93 | 2.635 | 50.07 | 7.356 |
| 49.52 | 0.069 | 50.08 | 0.070 | 49.52 | 0.171 | 49.48 | 0.334 | 50.05 | 0.524 | 50.04 | 2.616 | 50.14 | 7.275 |
| 49.61 | 0.077 | 50.16 | 0.071 | 49.61 | 0.167 | 49.57 | 0.328 | 50.14 | 0.524 | 50.14 | 2.589 | 50.26 | 7.224 |
| 49.72 | 0.073 | 50.28 | 0.073 | 49.71 | 0.166 | 49.67 | 0.326 | 50.24 | 0.521 | 50.23 | 2.571 | 50.34 | 7.163 |
| 49.80 | 0.074 | 50.35 | 0.073 | 49.80 | 0.166 | 49.77 | 0.327 | 50.35 | 0.518 | 50.32 | 2.555 | 50.45 | 7.109 |
| 49.89 | 0.067 | 50.47 | 0.073 | 49.89 | 0.165 | 49.87 | 0.324 | 50.43 | 0.514 | 50.41 | 2.534 | 50.53 | 7.052 |
| 49.98 | 0.072 | 50.56 | 0.068 | 50.00 | 0.164 | 49.96 | 0.319 | 50.53 | 0.512 | 50.52 | 2.513 | 50.63 | 6.975 |
| 50.08 | 0.070 | 50.65 | 0.073 | 50.09 | 0.164 | 50.05 | 0.319 | 50.62 | 0.502 | 50.62 | 2.486 | 50.73 | 6.934 |
| 50.17 | 0.077 | 50.75 | 0.070 | 50.19 | 0.163 | 50.14 | 0.316 | 50.73 | 0.501 | 50.72 | 2.471 | 50.82 | 6.883 |
| 50.27 | 0.068 | 50.85 | 0.065 | 50.28 | 0.159 | 50.24 | 0.316 | 50.82 | 0.502 | 50.80 | 2.456 | 50.92 | 6.791 |
| 50.35 | 0.070 | 50.94 | 0.078 | 50.38 | 0.160 | 50.35 | 0.314 | 50.93 | 0.496 | 50.91 | 2.424 | 51.01 | 6.763 |
| 50.45 | 0.069 | 51.04 | 0.069 | 50.46 | 0.160 | 50.44 | 0.313 | 51.01 | 0.497 | 51.00 | 2.415 | 51.11 | 6.680 |
| 50.55 | 0.073 | 51.14 | 0.070 | 50.54 | 0.160 | 50.53 | 0.311 | 51.12 | 0.493 | 51.11 | 2.387 | 51.21 | 6.630 |
| 50.63 | 0.068 | 51.23 | 0.070 | 50.65 | 0.156 | 50.62 | 0.308 | 51.22 | 0.489 | 51.19 | 2.374 | 51.30 | 6.559 |
| 50.75 | 0.069 | 51.32 | 0.070 | 50.75 | 0.159 | 50.73 | 0.308 | 51.32 | 0.484 | 51.29 | 2.345 | 51.41 | 6.533 |
| 50.83 | 0.069 | 51.43 | 0.068 | 50.84 | 0.156 | 50.80 | 0.306 | 51.41 | 0.475 | 51.38 | 2.339 | 51.50 | 6.455 |
| 50.92 | 0.069 | 51.51 | 0.069 | 50.94 | 0.155 | 50.92 | 0.306 | 51.50 | 0.475 | 51.47 | 2.319 | 51.59 | 6.379 |
| 51.02 | 0.070 | 51.60 | 0.065 | 51.04 | 0.155 | 51.01 | 0.299 | 51.59 | 0.475 | 51.58 | 2.299 | 51.70 | 6.346 |
| 51.10 | 0.073 | 51.71 | 0.070 | 51.12 | 0.156 | 51.09 | 0.300 | 51.71 | 0.475 | 51.67 | 2.272 | 51.79 | 6.302 |
| 51.19 | 0.069 | 51.80 | 0.065 | 51.21 | 0.155 | 51.19 | 0.300 | 51.79 | 0.472 | 51.76 | 2.259 | 51.90 | 6.246 |
| 51.29 | 0.069 | 51.90 | 0.069 | 51.30 | 0.155 | 51.29 | 0.298 | 51.90 | 0.467 | 51.87 | 2.245 | 51.99 | 6.209 |
| 51.40 | 0.066 | 52.00 | 0.065 | 51.41 | 0.154 | 51.38 | 0.296 | 51.98 | 0.467 | 51.97 | 2.222 | 52.09 | 6.145 |

|       |       |       |       |       |       |       |       |       |       |       |       |       |       |
|-------|-------|-------|-------|-------|-------|-------|-------|-------|-------|-------|-------|-------|-------|
| 51.48 | 0.065 | 52.10 | 0.069 | 51.50 | 0.155 | 51.48 | 0.289 | 52.08 | 0.463 | 52.06 | 2.211 | 52.16 | 6.097 |
| 51.58 | 0.065 | 52.18 | 0.065 | 51.61 | 0.151 | 51.57 | 0.290 | 52.18 | 0.458 | 52.17 | 2.191 | 52.28 | 6.045 |
| 51.68 | 0.064 | 52.30 | 0.067 | 51.69 | 0.151 | 51.67 | 0.287 | 52.28 | 0.452 | 52.26 | 2.162 | 52.37 | 5.999 |
| 51.76 | 0.071 | 52.39 | 0.066 | 51.79 | 0.149 | 51.75 | 0.286 | 52.36 | 0.449 | 52.35 | 2.145 | 52.47 | 5.931 |
| 51.86 | 0.073 | 52.47 | 0.064 | 51.87 | 0.148 | 51.87 | 0.289 | 52.47 | 0.448 | 52.45 | 2.133 | 52.57 | 5.905 |
| 51.96 | 0.071 | 52.59 | 0.074 | 51.98 | 0.149 | 51.94 | 0.282 | 52.57 | 0.453 | 52.55 | 2.126 | 52.66 | 5.849 |
| 52.04 | 0.068 | 52.68 | 0.064 | 52.08 | 0.150 | 52.06 | 0.280 | 52.66 | 0.444 | 52.64 | 2.097 | 52.74 | 5.803 |
| 52.16 | 0.069 | 52.75 | 0.064 | 52.16 | 0.147 | 52.14 | 0.281 | 52.75 | 0.444 | 52.74 | 2.089 | 52.85 | 5.763 |
| 52.25 | 0.071 | 52.86 | 0.063 | 52.26 | 0.146 | 52.22 | 0.283 | 52.86 | 0.443 | 52.82 | 2.078 | 52.95 | 5.702 |
| 52.34 | 0.069 | 52.96 | 0.066 | 52.35 | 0.145 | 52.34 | 0.282 | 52.95 | 0.435 | 52.93 | 2.062 | 53.05 | 5.660 |
| 52.43 | 0.071 | 53.05 | 0.064 | 52.44 | 0.147 | 52.43 | 0.279 | 53.04 | 0.438 | 53.02 | 2.033 | 53.14 | 5.613 |
| 52.53 | 0.066 | 53.16 | 0.061 | 52.55 | 0.145 | 52.52 | 0.274 | 53.15 | 0.430 | 53.13 | 2.019 | 53.23 | 5.550 |
| 52.63 | 0.067 | 53.26 | 0.063 | 52.62 | 0.144 | 52.61 | 0.275 | 53.24 | 0.431 | 53.23 | 2.013 | 53.33 | 5.525 |
| 52.70 | 0.069 | 53.34 | 0.069 | 52.70 | 0.145 | 52.71 | 0.275 | 53.34 | 0.427 | 53.31 | 1.996 | 53.43 | 5.480 |
| 52.82 | 0.067 | 53.45 | 0.061 | 52.81 | 0.143 | 52.81 | 0.272 | 53.44 | 0.425 | 53.41 | 1.972 | 53.53 | 5.437 |
| 52.92 | 0.075 | 53.55 | 0.065 | 52.92 | 0.144 | 52.90 | 0.272 | 53.52 | 0.423 | 53.51 | 1.964 | 53.63 | 5.380 |
| 53.01 | 0.065 | 53.63 | 0.057 | 52.99 | 0.141 | 52.99 | 0.265 | 53.62 | 0.418 | 53.61 | 1.948 | 53.72 | 5.357 |
| 53.09 | 0.071 | 53.74 | 0.067 | 53.08 | 0.141 | 53.10 | 0.267 | 53.71 | 0.413 | 53.70 | 1.931 | 53.82 | 5.290 |
| 53.19 | 0.068 | 53.82 | 0.061 | 53.18 | 0.139 | 53.19 | 0.269 | 53.82 | 0.412 | 53.79 | 1.920 | 53.91 | 5.255 |
| 53.28 | 0.067 | 53.94 | 0.072 | 53.28 | 0.141 | 53.27 | 0.265 | 53.91 | 0.411 | 53.89 | 1.897 | 54.01 | 5.213 |
| 53.38 | 0.070 | 54.05 | 0.062 | 53.38 | 0.136 | 53.37 | 0.265 | 54.02 | 0.411 | 53.98 | 1.884 | 54.09 | 5.201 |
| 53.47 | 0.062 | 54.12 | 0.065 | 53.47 | 0.136 | 53.47 | 0.261 | 54.10 | 0.407 | 54.08 | 1.870 | 54.19 | 5.131 |
| 53.56 | 0.063 | 54.22 | 0.060 | 53.56 | 0.138 | 53.56 | 0.258 | 54.20 | 0.407 | 54.18 | 1.856 | 54.29 | 5.097 |
| 53.66 | 0.065 | 54.33 | 0.064 | 53.66 | 0.137 | 53.65 | 0.258 | 54.29 | 0.405 | 54.28 | 1.836 | 54.39 | 5.037 |
| 53.76 | 0.069 | 54.41 | 0.073 | 53.75 | 0.137 | 53.75 | 0.257 | 54.40 | 0.400 | 54.36 | 1.830 | 54.49 | 5.001 |
| 53.86 | 0.071 | 54.52 | 0.061 | 53.84 | 0.136 | 53.85 | 0.259 | 54.49 | 0.399 | 54.46 | 1.812 | 54.58 | 4.964 |
| 53.94 | 0.069 | 54.61 | 0.061 | 53.94 | 0.134 | 53.93 | 0.256 | 54.60 | 0.395 | 54.57 | 1.802 | 54.68 | 4.926 |
| 54.03 | 0.069 | 54.71 | 0.063 | 54.04 | 0.133 | 54.03 | 0.253 | 54.69 | 0.391 | 54.68 | 1.785 | 54.78 | 4.876 |
| 54.12 | 0.065 | 54.80 | 0.069 | 54.12 | 0.134 | 54.12 | 0.249 | 54.78 | 0.391 | 54.76 | 1.772 | 54.87 | 4.841 |
| 54.21 | 0.065 | 54.90 | 0.060 | 54.23 | 0.132 | 54.22 | 0.256 | 54.87 | 0.389 | 54.85 | 1.759 | 54.97 | 4.801 |
| 54.32 | 0.071 | 55.00 | 0.059 | 54.32 | 0.134 | 54.34 | 0.249 | 54.99 | 0.388 | 54.95 | 1.741 | 55.06 | 4.762 |
| 54.42 | 0.075 | 55.09 | 0.063 | 54.41 | 0.133 | 54.43 | 0.248 | 55.08 | 0.379 | 55.05 | 1.734 | 55.17 | 4.716 |
| 54.51 | 0.064 | 55.18 | 0.061 | 54.50 | 0.131 | 54.50 | 0.248 | 55.18 | 0.383 | 55.15 | 1.724 | 55.26 | 4.680 |
| 54.61 | 0.071 | 55.29 | 0.063 | 54.61 | 0.133 | 54.60 | 0.246 | 55.25 | 0.379 | 55.24 | 1.706 | 55.36 | 4.644 |
| 54.69 | 0.061 | 55.39 | 0.060 | 54.70 | 0.126 | 54.71 | 0.243 | 55.36 | 0.374 | 55.35 | 1.693 | 55.45 | 4.611 |
| 54.79 | 0.064 | 55.47 | 0.059 | 54.79 | 0.131 | 54.80 | 0.246 | 55.46 | 0.377 | 55.43 | 1.680 | 55.54 | 4.579 |
| 54.89 | 0.068 | 55.57 | 0.056 | 54.88 | 0.131 | 54.90 | 0.244 | 55.56 | 0.369 | 55.53 | 1.661 | 55.65 | 4.543 |
| 54.98 | 0.061 | 55.69 | 0.060 | 54.97 | 0.128 | 54.99 | 0.240 | 55.65 | 0.370 | 55.63 | 1.661 | 55.73 | 4.487 |
| 55.07 | 0.069 | 55.76 | 0.059 | 55.06 | 0.126 | 55.08 | 0.237 | 55.75 | 0.369 | 55.72 | 1.643 | 55.83 | 4.467 |
| 55.16 | 0.062 | 55.86 | 0.064 | 55.17 | 0.129 | 55.18 | 0.239 | 55.85 | 0.370 | 55.83 | 1.629 | 55.93 | 4.435 |
| 55.25 | 0.068 | 55.96 | 0.065 | 55.26 | 0.128 | 55.27 | 0.237 | 55.95 | 0.362 | 55.92 | 1.618 | 56.01 | 4.383 |
| 55.33 | 0.065 | 56.04 | 0.060 | 55.34 | 0.127 | 55.36 | 0.237 | 56.05 | 0.364 | 56.02 | 1.613 | 56.12 | 4.368 |

|       |       |       |       |       |       |       |       |       |       |       |       |       |       |
|-------|-------|-------|-------|-------|-------|-------|-------|-------|-------|-------|-------|-------|-------|
| 55.43 | 0.069 | 56.15 | 0.062 | 55.45 | 0.126 | 55.46 | 0.235 | 56.14 | 0.359 | 56.12 | 1.594 | 56.21 | 4.326 |
| 55.55 | 0.070 | 56.24 | 0.058 | 55.56 | 0.123 | 55.57 | 0.232 | 56.24 | 0.364 | 56.22 | 1.587 | 56.33 | 4.276 |
| 55.64 | 0.063 | 56.34 | 0.061 | 55.62 | 0.127 | 55.64 | 0.231 | 56.33 | 0.356 | 56.30 | 1.569 | 56.41 | 4.238 |
| 55.73 | 0.069 | 56.44 | 0.059 | 55.72 | 0.127 | 55.73 | 0.231 | 56.43 | 0.351 | 56.40 | 1.555 | 56.50 | 4.243 |
| 55.83 | 0.067 | 56.53 | 0.056 | 55.81 | 0.125 | 55.85 | 0.231 | 56.52 | 0.353 | 56.50 | 1.548 | 56.61 | 4.196 |
| 55.93 | 0.062 | 56.65 | 0.060 | 55.91 | 0.122 | 55.93 | 0.224 | 56.60 | 0.349 | 56.59 | 1.533 | 56.69 | 4.179 |
| 56.00 | 0.061 | 56.72 | 0.053 | 56.02 | 0.122 | 56.04 | 0.228 | 56.70 | 0.348 | 56.69 | 1.524 | 56.79 | 4.124 |
| 56.10 | 0.063 | 56.84 | 0.067 | 56.11 | 0.121 | 56.11 | 0.227 | 56.81 | 0.342 | 56.79 | 1.512 | 56.88 | 4.088 |
| 56.19 | 0.067 | 56.93 | 0.063 | 56.20 | 0.121 | 56.21 | 0.223 | 56.90 | 0.342 | 56.88 | 1.499 | 56.98 | 4.067 |
| 56.28 | 0.060 | 57.02 | 0.056 | 56.28 | 0.123 | 56.31 | 0.226 | 57.01 | 0.343 | 56.97 | 1.491 | 57.08 | 4.021 |
| 56.37 | 0.065 | 57.11 | 0.058 | 56.39 | 0.119 | 56.40 | 0.221 | 57.11 | 0.337 | 57.07 | 1.480 | 57.18 | 3.994 |
| 56.47 | 0.066 | 57.20 | 0.056 | 56.49 | 0.122 | 56.50 | 0.218 | 57.21 | 0.343 | 57.17 | 1.470 | 57.27 | 3.959 |
| 56.58 | 0.070 | 57.31 | 0.059 | 56.59 | 0.122 | 56.60 | 0.222 | 57.28 | 0.338 | 57.27 | 1.458 | 57.37 | 3.947 |
| 56.66 | 0.067 | 57.41 | 0.059 | 56.68 | 0.119 | 56.69 | 0.219 | 57.40 | 0.337 | 57.36 | 1.450 | 57.47 | 3.904 |
| 56.77 | 0.060 | 57.51 | 0.058 | 56.78 | 0.119 | 56.77 | 0.218 | 57.49 | 0.331 | 57.45 | 1.437 | 57.56 | 3.877 |
| 56.85 | 0.060 | 57.59 | 0.061 | 56.87 | 0.119 | 56.89 | 0.219 | 57.59 | 0.331 | 57.54 | 1.427 | 57.67 | 3.843 |
| 56.94 | 0.064 | 57.69 | 0.057 | 56.97 | 0.119 | 56.98 | 0.216 | 57.69 | 0.331 | 57.65 | 1.416 | 57.77 | 3.811 |
| 57.03 | 0.058 | 57.79 | 0.057 | 57.06 | 0.119 | 57.07 | 0.217 | 57.78 | 0.325 | 57.75 | 1.412 | 57.85 | 3.774 |
| 57.13 | 0.067 | 57.89 | 0.059 | 57.16 | 0.118 | 57.17 | 0.213 | 57.88 | 0.324 | 57.85 | 1.394 | 57.94 | 3.756 |
| 57.23 | 0.067 | 57.99 | 0.054 | 57.24 | 0.116 | 57.25 | 0.214 | 57.97 | 0.323 | 57.94 | 1.381 | 58.05 | 3.738 |
| 57.33 | 0.058 | 58.08 | 0.055 | 57.33 | 0.117 | 57.36 | 0.212 | 58.08 | 0.317 | 58.04 | 1.378 | 58.14 | 3.695 |
| 57.41 | 0.066 | 58.18 | 0.051 | 57.43 | 0.114 | 57.46 | 0.212 | 58.15 | 0.318 | 58.11 | 1.364 | 58.25 | 3.671 |
| 57.50 | 0.066 | 58.28 | 0.061 | 57.52 | 0.117 | 57.56 | 0.211 | 58.26 | 0.323 | 58.23 | 1.356 | 58.34 | 3.648 |
| 57.59 | 0.065 | 58.37 | 0.060 | 57.62 | 0.114 | 57.65 | 0.208 | 58.35 | 0.319 | 58.32 | 1.339 | 58.43 | 3.626 |
| 57.68 | 0.070 | 58.48 | 0.058 | 57.69 | 0.115 | 57.74 | 0.206 | 58.45 | 0.318 | 58.42 | 1.337 | 58.52 | 3.590 |
| 57.78 | 0.068 | 58.58 | 0.057 | 57.79 | 0.113 | 57.83 | 0.208 | 58.56 | 0.314 | 58.52 | 1.327 | 58.62 | 3.562 |
| 57.89 | 0.065 | 58.67 | 0.050 | 57.89 | 0.114 | 57.93 | 0.205 | 58.66 | 0.305 | 58.62 | 1.312 | 58.71 | 3.534 |
| 57.97 | 0.062 | 58.77 | 0.062 | 57.98 | 0.111 | 58.03 | 0.208 | 58.75 | 0.307 | 58.70 | 1.308 | 58.82 | 3.495 |
| 58.06 | 0.060 | 58.86 | 0.049 | 58.08 | 0.112 | 58.11 | 0.207 | 58.84 | 0.305 | 58.81 | 1.299 | 58.91 | 3.483 |
| 58.17 | 0.064 | 58.94 | 0.059 | 58.18 | 0.110 | 58.23 | 0.202 | 58.93 | 0.308 | 58.91 | 1.288 | 59.02 | 3.441 |
| 58.26 | 0.061 | 59.05 | 0.053 | 58.27 | 0.115 | 58.31 | 0.201 | 59.04 | 0.301 | 59.00 | 1.273 | 59.10 | 3.423 |
| 58.35 | 0.062 | 59.15 | 0.057 | 58.34 | 0.112 | 58.41 | 0.200 | 59.13 | 0.301 | 59.09 | 1.270 | 59.20 | 3.385 |
| 58.44 | 0.060 | 59.25 | 0.050 | 58.45 | 0.109 | 58.50 | 0.197 | 59.23 | 0.301 | 59.20 | 1.259 | 59.29 | 3.358 |
| 58.54 | 0.065 | 59.33 | 0.051 | 58.55 | 0.111 | 58.59 | 0.202 | 59.33 | 0.301 | 59.29 | 1.258 | 59.40 | 3.338 |
| 58.62 | 0.064 | 59.46 | 0.051 | 58.65 | 0.108 | 58.68 | 0.197 | 59.40 | 0.297 | 59.39 | 1.244 | 59.48 | 3.305 |
| 58.74 | 0.062 | 59.52 | 0.061 | 58.75 | 0.111 | 58.79 | 0.197 | 59.51 | 0.299 | 59.48 | 1.233 | 59.60 | 3.289 |
| 58.83 | 0.060 | 59.64 | 0.057 | 58.84 | 0.111 | 58.89 | 0.191 | 59.61 | 0.295 | 59.59 | 1.227 | 59.69 | 3.254 |
| 58.91 | 0.060 | 59.72 | 0.057 | 58.91 | 0.107 | 58.97 | 0.197 | 59.71 | 0.293 | 59.68 | 1.214 | 59.80 | 3.216 |
| 58.99 | 0.063 | 59.83 | 0.060 | 59.02 | 0.106 | 59.08 | 0.193 | 59.80 | 0.289 | 59.78 | 1.209 | 59.89 | 3.200 |
| 59.09 | 0.064 | 59.91 | 0.054 | 59.11 | 0.105 | 59.16 | 0.195 | 59.89 | 0.287 | 59.87 | 1.197 | 59.99 | 3.185 |
| 59.19 | 0.065 | 60.01 | 0.063 | 59.21 | 0.107 | 59.27 | 0.189 | 59.99 | 0.290 | 59.99 | 1.196 | 60.09 | 3.154 |
| 59.28 | 0.062 | 60.11 | 0.050 | 59.32 | 0.109 | 59.36 | 0.190 | 60.09 | 0.288 | 60.06 | 1.183 | 60.17 | 3.132 |



|       |       |       |       |       |       |       |       |       |       |       |       |       |       |
|-------|-------|-------|-------|-------|-------|-------|-------|-------|-------|-------|-------|-------|-------|
| 59.37 | 0.062 | 60.20 | 0.059 | 59.41 | 0.105 | 59.44 | 0.189 | 60.19 | 0.286 | 60.16 | 1.173 | 60.28 | 3.113 |
| 59.46 | 0.065 | 60.29 | 0.051 | 59.50 | 0.106 | 59.54 | 0.190 | 60.27 | 0.287 | 60.25 | 1.166 | 60.36 | 3.092 |
| 59.57 | 0.057 | 60.41 | 0.061 | 59.59 | 0.105 | 59.63 | 0.188 | 60.40 | 0.283 | 60.36 | 1.157 | 60.47 | 3.058 |
| 59.65 | 0.062 | 60.51 | 0.056 | 59.69 | 0.105 | 59.74 | 0.188 | 60.47 | 0.284 | 60.46 | 1.153 | 60.57 | 3.037 |
| 59.76 | 0.062 | 60.61 | 0.055 | 59.77 | 0.105 | 59.82 | 0.190 | 60.56 | 0.277 | 60.55 | 1.138 | 60.65 | 3.020 |
| 59.84 | 0.065 | 60.71 | 0.051 | 59.88 | 0.103 | 59.92 | 0.184 | 60.66 | 0.278 | 60.64 | 1.135 | 60.77 | 2.995 |
| 59.93 | 0.063 | 60.80 | 0.054 | 59.97 | 0.104 | 60.02 | 0.183 | 60.77 | 0.276 | 60.74 | 1.123 | 60.85 | 2.965 |
| 60.02 | 0.059 | 60.88 | 0.054 | 60.07 | 0.104 | 60.11 | 0.185 | 60.85 | 0.275 | 60.84 | 1.121 | 60.95 | 2.941 |
| 60.12 | 0.062 | 61.00 | 0.055 | 60.15 | 0.105 | 60.21 | 0.181 | 60.94 | 0.269 | 60.94 | 1.109 | 61.05 | 2.926 |
| 60.21 | 0.063 | 61.08 | 0.047 | 60.26 | 0.104 | 60.31 | 0.185 | 61.04 | 0.273 | 61.03 | 1.100 | 61.15 | 2.912 |
| 60.31 | 0.060 | 61.17 | 0.051 | 60.35 | 0.100 | 60.39 | 0.183 | 61.15 | 0.273 | 61.13 | 1.095 | 61.23 | 2.887 |
| 60.39 | 0.063 | 61.27 | 0.054 | 60.44 | 0.105 | 60.47 | 0.180 | 61.24 | 0.270 | 61.23 | 1.087 | 61.33 | 2.870 |
| 60.49 | 0.061 | 61.36 | 0.056 | 60.54 | 0.101 | 60.60 | 0.179 | 61.33 | 0.267 | 61.31 | 1.079 | 61.43 | 2.827 |
| 60.58 | 0.063 | 61.47 | 0.058 | 60.63 | 0.099 | 60.68 | 0.179 | 61.44 | 0.267 | 61.42 | 1.069 | 61.54 | 2.820 |
| 60.68 | 0.061 | 61.58 | 0.049 | 60.72 | 0.101 | 60.77 | 0.178 | 61.52 | 0.265 | 61.50 | 1.062 | 61.62 | 2.793 |
| 60.75 | 0.061 | 61.65 | 0.057 | 60.82 | 0.100 | 60.88 | 0.177 | 61.61 | 0.264 | 61.60 | 1.052 | 61.72 | 2.772 |
| 60.88 | 0.062 | 61.74 | 0.052 | 60.91 | 0.102 | 60.96 | 0.180 | 61.72 | 0.267 | 61.70 | 1.054 | 61.81 | 2.752 |
| 60.96 | 0.059 | 61.84 | 0.058 | 61.00 | 0.100 | 61.07 | 0.178 | 61.83 | 0.259 | 61.80 | 1.051 | 61.92 | 2.727 |
| 61.06 | 0.063 | 61.96 | 0.049 | 61.08 | 0.101 | 61.15 | 0.175 | 61.93 | 0.261 | 61.89 | 1.038 | 62.01 | 2.715 |
| 61.15 | 0.063 | 62.04 | 0.049 | 61.21 | 0.100 | 61.24 | 0.171 | 62.00 | 0.257 | 61.99 | 1.030 | 62.09 | 2.688 |
| 61.24 | 0.060 | 62.15 | 0.054 | 61.29 | 0.100 | 61.35 | 0.174 | 62.12 | 0.257 | 62.09 | 1.019 | 62.21 | 2.669 |
| 61.34 | 0.059 | 62.22 | 0.059 | 61.39 | 0.097 | 61.44 | 0.177 | 62.20 | 0.258 | 62.18 | 1.010 | 62.30 | 2.652 |
| 61.43 | 0.062 | 62.34 | 0.058 | 61.46 | 0.097 | 61.55 | 0.172 | 62.30 | 0.254 | 62.29 | 1.004 | 62.39 | 2.617 |
| 61.54 | 0.059 | 62.43 | 0.048 | 61.58 | 0.096 | 61.63 | 0.174 | 62.39 | 0.251 | 62.38 | 0.997 | 62.50 | 2.608 |
| 61.62 | 0.062 | 62.53 | 0.057 | 61.66 | 0.099 | 61.74 | 0.173 | 62.51 | 0.252 | 62.46 | 0.996 | 62.58 | 2.598 |
| 61.72 | 0.065 | 62.63 | 0.052 | 61.76 | 0.094 | 61.83 | 0.171 | 62.59 | 0.250 | 62.56 | 0.979 | 62.68 | 2.579 |
| 61.82 | 0.060 | 62.72 | 0.056 | 61.85 | 0.094 | 61.92 | 0.171 | 62.68 | 0.247 | 62.67 | 0.978 | 62.76 | 2.551 |
| 61.90 | 0.066 | 62.82 | 0.051 | 61.93 | 0.097 | 62.00 | 0.168 | 62.77 | 0.248 | 62.76 | 0.974 | 62.88 | 2.535 |
| 61.99 | 0.059 | 62.91 | 0.051 | 62.04 | 0.094 | 62.11 | 0.167 | 62.88 | 0.243 | 62.85 | 0.972 | 62.97 | 2.518 |
| 62.08 | 0.057 | 63.03 | 0.052 | 62.13 | 0.098 | 62.21 | 0.162 | 62.97 | 0.249 | 62.97 | 0.960 | 63.07 | 2.498 |
| 62.18 | 0.060 | 63.11 | 0.050 | 62.22 | 0.093 | 62.30 | 0.169 | 63.07 | 0.250 | 63.05 | 0.953 | 63.15 | 2.477 |
| 62.28 | 0.061 | 63.20 | 0.051 | 62.33 | 0.095 | 62.40 | 0.161 | 63.17 | 0.243 | 63.14 | 0.946 | 63.27 | 2.459 |
| 62.37 | 0.064 | 63.30 | 0.058 | 62.42 | 0.093 | 62.48 | 0.164 | 63.28 | 0.243 | 63.25 | 0.948 | 63.35 | 2.434 |
| 62.47 | 0.058 | 63.39 | 0.055 | 62.50 | 0.097 | 62.59 | 0.163 | 63.36 | 0.240 | 63.34 | 0.933 | 63.45 | 2.426 |
| 62.56 | 0.058 | 63.49 | 0.049 | 62.59 | 0.096 | 62.67 | 0.165 | 63.44 | 0.241 | 63.45 | 0.919 | 63.55 | 2.406 |
| 62.66 | 0.059 | 63.58 | 0.058 | 62.70 | 0.095 | 62.77 | 0.162 | 63.55 | 0.235 | 63.53 | 0.923 | 63.65 | 2.386 |
| 62.75 | 0.057 | 63.67 | 0.053 | 62.79 | 0.096 | 62.87 | 0.164 | 63.66 | 0.236 | 63.64 | 0.920 | 63.74 | 2.373 |
| 62.84 | 0.060 | 63.79 | 0.055 | 62.89 | 0.093 | 62.97 | 0.160 | 63.75 | 0.231 | 63.74 | 0.909 | 63.83 | 2.348 |
| 62.94 | 0.059 | 63.89 | 0.047 | 62.97 | 0.095 | 63.06 | 0.155 | 63.84 | 0.228 | 63.83 | 0.901 | 63.94 | 2.330 |
| 63.03 | 0.059 | 63.98 | 0.058 | 63.10 | 0.097 | 63.17 | 0.163 | 63.94 | 0.233 | 63.93 | 0.894 | 64.03 | 2.323 |
| 63.13 | 0.061 | 64.08 | 0.053 | 63.17 | 0.089 | 63.26 | 0.162 | 64.05 | 0.230 | 64.01 | 0.888 | 64.14 | 2.290 |
| 63.23 | 0.061 | 64.16 | 0.049 | 63.28 | 0.093 | 63.34 | 0.161 | 64.13 | 0.231 | 64.13 | 0.883 | 64.23 | 2.286 |

|       |       |       |       |       |       |       |       |       |       |       |       |       |       |
|-------|-------|-------|-------|-------|-------|-------|-------|-------|-------|-------|-------|-------|-------|
| 63.33 | 0.068 | 64.26 | 0.056 | 63.37 | 0.092 | 63.45 | 0.158 | 64.23 | 0.226 | 64.21 | 0.878 | 64.33 | 2.268 |
| 63.42 | 0.058 | 64.36 | 0.045 | 63.45 | 0.091 | 63.53 | 0.156 | 64.33 | 0.225 | 64.31 | 0.875 | 64.41 | 2.246 |
| 63.51 | 0.058 | 64.45 | 0.053 | 63.55 | 0.093 | 63.63 | 0.156 | 64.43 | 0.226 | 64.41 | 0.870 | 64.52 | 2.242 |
| 63.61 | 0.056 | 64.56 | 0.047 | 63.64 | 0.092 | 63.74 | 0.153 | 64.53 | 0.230 | 64.52 | 0.860 | 64.60 | 2.210 |
| 63.69 | 0.062 | 64.64 | 0.050 | 63.74 | 0.090 | 63.81 | 0.155 | 64.63 | 0.226 | 64.60 | 0.853 | 64.71 | 2.203 |
| 63.81 | 0.062 | 64.75 | 0.050 | 63.83 | 0.091 | 63.91 | 0.153 | 64.71 | 0.223 | 64.70 | 0.851 | 64.79 | 2.193 |
| 63.90 | 0.069 | 64.85 | 0.060 | 63.93 | 0.091 | 64.02 | 0.155 | 64.82 | 0.222 | 64.79 | 0.844 | 64.92 | 2.171 |
| 64.00 | 0.053 | 64.95 | 0.051 | 64.03 | 0.090 | 64.10 | 0.153 | 64.92 | 0.219 | 64.89 | 0.842 | 64.99 | 2.158 |
| 64.10 | 0.054 | 65.04 | 0.048 | 64.14 | 0.090 | 64.18 | 0.151 | 65.02 | 0.219 | 64.99 | 0.832 | 65.09 | 2.127 |
| 64.19 | 0.061 | 65.12 | 0.050 | 64.22 | 0.087 | 64.28 | 0.152 | 65.10 | 0.216 | 65.07 | 0.828 | 65.18 | 2.122 |
| 64.29 | 0.061 | 65.23 | 0.048 | 64.31 | 0.087 | 64.38 | 0.147 | 65.20 | 0.217 | 65.17 | 0.825 | 65.30 | 2.104 |
| 64.38 | 0.063 | 65.33 | 0.057 | 64.40 | 0.092 | 64.48 | 0.150 | 65.30 | 0.221 | 65.28 | 0.816 | 65.39 | 2.082 |
| 64.46 | 0.061 | 65.41 | 0.045 | 64.51 | 0.090 | 64.58 | 0.153 | 65.39 | 0.216 | 65.37 | 0.813 | 65.47 | 2.091 |
| 64.58 | 0.065 | 65.53 | 0.053 | 64.59 | 0.087 | 64.68 | 0.151 | 65.49 | 0.211 | 65.44 | 0.815 | 65.57 | 2.068 |
| 64.67 | 0.052 | 65.61 | 0.056 | 64.69 | 0.092 | 64.77 | 0.149 | 65.58 | 0.212 | 65.56 | 0.805 | 65.67 | 2.043 |
| 64.75 | 0.058 | 65.71 | 0.055 | 64.78 | 0.087 | 64.87 | 0.148 | 65.68 | 0.209 | 65.65 | 0.798 | 65.78 | 2.027 |
| 64.85 | 0.062 | 65.82 | 0.047 | 64.89 | 0.086 | 64.96 | 0.146 | 65.78 | 0.214 | 65.76 | 0.797 | 65.88 | 2.023 |
| 64.96 | 0.057 | 65.90 | 0.051 | 64.99 | 0.086 | 65.05 | 0.144 | 65.87 | 0.207 | 65.85 | 0.788 | 65.97 | 2.000 |
| 65.03 | 0.059 | 65.98 | 0.045 | 65.06 | 0.090 | 65.15 | 0.142 | 65.98 | 0.212 | 65.95 | 0.783 | 66.05 | 1.992 |
| 65.14 | 0.066 | 66.11 | 0.062 | 65.19 | 0.084 | 65.25 | 0.141 | 66.07 | 0.208 | 66.04 | 0.776 | 66.16 | 1.960 |
| 65.23 | 0.061 | 66.18 | 0.040 | 65.25 | 0.089 | 65.33 | 0.143 | 66.16 | 0.203 | 66.15 | 0.774 | 66.26 | 1.957 |
| 65.34 | 0.056 | 66.29 | 0.055 | 65.37 | 0.085 | 65.44 | 0.144 | 66.27 | 0.205 | 66.24 | 0.764 | 66.35 | 1.940 |
| 65.42 | 0.059 | 66.38 | 0.046 | 65.46 | 0.086 | 65.53 | 0.143 | 66.35 | 0.206 | 66.34 | 0.759 | 66.45 | 1.938 |
| 65.50 | 0.055 | 66.48 | 0.054 | 65.56 | 0.087 | 65.63 | 0.147 | 66.46 | 0.206 | 66.44 | 0.753 | 66.54 | 1.914 |
| 65.62 | 0.051 | 66.58 | 0.050 | 65.65 | 0.082 | 65.71 | 0.142 | 66.54 | 0.203 | 66.52 | 0.754 | 66.65 | 1.894 |
| 65.72 | 0.057 | 66.69 | 0.045 | 65.74 | 0.083 | 65.80 | 0.142 | 66.65 | 0.204 | 66.63 | 0.748 | 66.74 | 1.881 |
| 65.80 | 0.060 | 66.77 | 0.048 | 65.84 | 0.083 | 65.92 | 0.142 | 66.74 | 0.200 | 66.72 | 0.741 | 66.83 | 1.879 |
| 65.92 | 0.060 | 66.88 | 0.046 | 65.93 | 0.084 | 66.00 | 0.142 | 66.83 | 0.201 | 66.81 | 0.739 | 66.92 | 1.861 |
| 66.01 | 0.054 | 66.98 | 0.055 | 66.03 | 0.085 | 66.10 | 0.143 | 66.95 | 0.203 | 66.93 | 0.735 | 67.02 | 1.846 |
| 66.10 | 0.058 | 67.07 | 0.049 | 66.12 | 0.083 | 66.19 | 0.140 | 67.04 | 0.198 | 67.02 | 0.722 | 67.12 | 1.838 |
| 66.19 | 0.060 | 67.17 | 0.047 | 66.22 | 0.085 | 66.28 | 0.138 | 67.13 | 0.198 | 67.11 | 0.726 | 67.23 | 1.820 |
| 66.27 | 0.061 | 67.26 | 0.049 | 66.31 | 0.084 | 66.39 | 0.137 | 67.23 | 0.197 | 67.20 | 0.720 | 67.32 | 1.798 |
| 66.38 | 0.055 | 67.36 | 0.047 | 66.41 | 0.085 | 66.49 | 0.137 | 67.33 | 0.195 | 67.30 | 0.715 | 67.42 | 1.800 |
| 66.47 | 0.054 | 67.46 | 0.053 | 66.50 | 0.081 | 66.58 | 0.138 | 67.44 | 0.191 | 67.39 | 0.709 | 67.51 | 1.787 |
| 66.56 | 0.058 | 67.54 | 0.053 | 66.59 | 0.082 | 66.67 | 0.134 | 67.52 | 0.196 | 67.50 | 0.705 | 67.60 | 1.772 |
| 66.65 | 0.056 | 67.65 | 0.049 | 66.69 | 0.082 | 66.77 | 0.136 | 67.63 | 0.194 | 67.57 | 0.698 | 67.69 | 1.753 |
| 66.76 | 0.058 | 67.75 | 0.055 | 66.77 | 0.081 | 66.86 | 0.135 | 67.72 | 0.193 | 67.67 | 0.696 | 67.78 | 1.750 |
| 66.86 | 0.060 | 67.84 | 0.054 | 66.87 | 0.084 | 66.97 | 0.133 | 67.81 | 0.193 | 67.77 | 0.689 | 67.90 | 1.733 |
| 66.94 | 0.056 | 67.95 | 0.050 | 66.97 | 0.082 | 67.05 | 0.135 | 67.91 | 0.192 | 67.88 | 0.689 | 67.99 | 1.722 |
| 67.04 | 0.063 | 68.03 | 0.047 | 67.06 | 0.080 | 67.15 | 0.137 | 68.00 | 0.189 | 67.96 | 0.684 | 68.09 | 1.704 |
| 67.13 | 0.058 | 68.13 | 0.049 | 67.17 | 0.082 | 67.23 | 0.136 | 68.10 | 0.192 | 68.07 | 0.680 | 68.20 | 1.689 |
| 67.23 | 0.059 | 68.24 | 0.048 | 67.25 | 0.077 | 67.32 | 0.137 | 68.19 | 0.187 | 68.17 | 0.679 | 68.27 | 1.685 |

|       |       |       |       |       |       |       |       |       |       |       |       |       |       |
|-------|-------|-------|-------|-------|-------|-------|-------|-------|-------|-------|-------|-------|-------|
| 67.31 | 0.056 | 68.32 | 0.047 | 67.34 | 0.081 | 67.45 | 0.132 | 68.28 | 0.186 | 68.26 | 0.672 | 68.38 | 1.672 |
| 67.42 | 0.064 | 68.43 | 0.056 | 67.45 | 0.079 | 67.53 | 0.135 | 68.39 | 0.189 | 68.35 | 0.669 | 68.47 | 1.657 |
| 67.51 | 0.060 | 68.52 | 0.044 | 67.54 | 0.084 | 67.61 | 0.133 | 68.49 | 0.188 | 68.47 | 0.666 | 68.58 | 1.645 |
| 67.60 | 0.060 | 68.62 | 0.053 | 67.62 | 0.082 | 67.70 | 0.128 | 68.59 | 0.180 | 68.55 | 0.662 | 68.67 | 1.628 |
| 67.71 | 0.052 | 68.71 | 0.046 | 67.72 | 0.084 | 67.81 | 0.134 | 68.68 | 0.184 | 68.66 | 0.651 | 68.76 | 1.621 |
| 67.79 | 0.060 | 68.80 | 0.054 | 67.81 | 0.080 | 67.90 | 0.127 | 68.77 | 0.185 | 68.75 | 0.651 | 68.86 | 1.612 |
| 67.89 | 0.060 | 68.90 | 0.044 | 67.91 | 0.079 | 67.98 | 0.127 | 68.86 | 0.182 | 68.85 | 0.651 | 68.95 | 1.611 |
| 68.00 | 0.056 | 69.01 | 0.047 | 68.00 | 0.077 | 68.09 | 0.128 | 68.96 | 0.182 | 68.94 | 0.645 | 69.05 | 1.584 |
| 68.07 | 0.057 | 69.11 | 0.056 | 68.09 | 0.077 | 68.17 | 0.129 | 69.05 | 0.174 | 69.04 | 0.634 | 69.16 | 1.587 |
| 68.18 | 0.055 | 69.20 | 0.044 | 68.18 | 0.078 | 68.27 | 0.130 | 69.15 | 0.183 | 69.13 | 0.630 | 69.24 | 1.565 |
| 68.25 | 0.054 | 69.29 | 0.056 | 68.29 | 0.076 | 68.37 | 0.126 | 69.24 | 0.178 | 69.23 | 0.635 | 69.35 | 1.553 |
| 68.36 | 0.059 | 69.38 | 0.045 | 68.36 | 0.081 | 68.47 | 0.126 | 69.34 | 0.181 | 69.32 | 0.619 | 69.43 | 1.546 |
| 68.45 | 0.058 | 69.48 | 0.039 | 68.48 | 0.076 | 68.57 | 0.126 | 69.45 | 0.179 | 69.41 | 0.625 | 69.53 | 1.551 |
| 68.56 | 0.060 | 69.60 | 0.047 | 68.58 | 0.079 | 68.65 | 0.131 | 69.56 | 0.175 | 69.51 | 0.622 | 69.62 | 1.531 |
| 68.64 | 0.056 | 69.67 | 0.055 | 68.67 | 0.076 | 68.74 | 0.125 | 69.64 | 0.172 | 69.61 | 0.619 | 69.72 | 1.516 |
| 68.75 | 0.058 | 69.77 | 0.043 | 68.76 | 0.076 | 68.86 | 0.126 | 69.74 | 0.174 | 69.70 | 0.614 | 69.82 | 1.503 |
| 68.82 | 0.055 | 69.86 | 0.048 | 68.86 | 0.080 | 68.94 | 0.127 | 69.83 | 0.174 | 69.81 | 0.608 | 69.91 | 1.486 |
| 68.94 | 0.066 | 69.97 | 0.046 | 68.95 | 0.073 | 69.03 | 0.125 | 69.93 | 0.177 | 69.90 | 0.605 | 70.01 | 1.482 |
| 69.03 | 0.055 | 70.07 | 0.051 | 69.04 | 0.072 | 69.13 | 0.123 | 70.02 | 0.176 | 70.00 | 0.604 | 70.11 | 1.476 |
| 69.12 | 0.055 | 70.16 | 0.056 | 69.15 | 0.077 | 69.22 | 0.122 | 70.11 | 0.177 | 70.09 | 0.598 | 70.21 | 1.472 |
| 69.20 | 0.052 | 70.25 | 0.040 | 69.24 | 0.073 | 69.32 | 0.124 | 70.23 | 0.164 | 70.18 | 0.593 | 70.32 | 1.451 |
| 69.30 | 0.060 | 70.37 | 0.051 | 69.35 | 0.079 | 69.40 | 0.121 | 70.31 | 0.170 | 70.28 | 0.592 | 70.40 | 1.441 |
| 69.40 | 0.060 | 70.45 | 0.049 | 69.44 | 0.075 | 69.51 | 0.124 | 70.41 | 0.167 | 70.37 | 0.584 | 70.50 | 1.429 |
| 69.49 | 0.057 | 70.54 | 0.050 | 69.53 | 0.081 | 69.60 | 0.123 | 70.51 | 0.166 | 70.46 | 0.585 | 70.60 | 1.419 |
| 69.57 | 0.061 | 70.64 | 0.048 | 69.62 | 0.078 | 69.68 | 0.121 | 70.61 | 0.165 | 70.57 | 0.578 | 70.69 | 1.418 |
| 69.68 | 0.059 | 70.75 | 0.042 | 69.71 | 0.079 | 69.78 | 0.119 | 70.69 | 0.170 | 70.67 | 0.577 | 70.79 | 1.400 |
| 69.76 | 0.056 | 70.84 | 0.053 | 69.81 | 0.075 | 69.88 | 0.118 | 70.81 | 0.165 | 70.77 | 0.576 | 70.89 | 1.402 |
| 69.85 | 0.057 | 70.92 | 0.044 | 69.89 | 0.075 | 69.97 | 0.121 | 70.89 | 0.169 | 70.85 | 0.569 | 70.98 | 1.381 |
| 69.95 | 0.061 | 71.01 | 0.057 | 70.00 | 0.072 | 70.08 | 0.121 | 71.00 | 0.163 | 70.97 | 0.569 | 71.08 | 1.377 |
| 70.05 | 0.057 | 71.13 | 0.039 | 70.08 | 0.076 | 70.18 | 0.121 | 71.09 | 0.167 | 71.05 | 0.566 | 71.18 | 1.361 |
| 70.15 | 0.064 | 71.22 | 0.044 | 70.19 | 0.073 | 70.26 | 0.120 | 71.18 | 0.163 | 71.17 | 0.559 | 71.26 | 1.359 |
| 70.24 | 0.064 | 71.30 | 0.049 | 70.29 | 0.069 | 70.35 | 0.118 | 71.27 | 0.164 | 71.26 | 0.562 | 71.36 | 1.351 |
| 70.34 | 0.055 | 71.42 | 0.042 | 70.38 | 0.074 | 70.47 | 0.117 | 71.38 | 0.159 | 71.35 | 0.548 | 71.45 | 1.334 |
| 70.43 | 0.054 | 71.50 | 0.044 | 70.48 | 0.073 | 70.55 | 0.113 | 71.46 | 0.164 | 71.45 | 0.543 | 71.56 | 1.324 |
| 70.52 | 0.056 | 71.61 | 0.046 | 70.57 | 0.075 | 70.65 | 0.118 | 71.57 | 0.160 | 71.55 | 0.542 | 71.65 | 1.317 |
| 70.61 | 0.057 | 71.70 | 0.042 | 70.67 | 0.071 | 70.74 | 0.119 | 71.67 | 0.157 | 71.64 | 0.539 | 71.75 | 1.307 |
| 70.70 | 0.064 | 71.79 | 0.054 | 70.78 | 0.073 | 70.83 | 0.115 | 71.76 | 0.158 | 71.74 | 0.537 | 71.85 | 1.304 |
| 70.80 | 0.058 | 71.89 | 0.042 | 70.86 | 0.071 | 70.93 | 0.117 | 71.87 | 0.164 | 71.83 | 0.539 | 71.93 | 1.288 |
| 70.89 | 0.057 | 71.99 | 0.042 | 70.95 | 0.072 | 71.01 | 0.120 | 71.96 | 0.157 | 71.93 | 0.534 | 72.03 | 1.287 |
| 70.98 | 0.057 | 72.08 | 0.048 | 71.04 | 0.068 | 71.11 | 0.112 | 72.05 | 0.158 | 72.02 | 0.533 | 72.13 | 1.269 |
| 71.09 | 0.056 | 72.16 | 0.042 | 71.14 | 0.074 | 71.23 | 0.117 | 72.15 | 0.154 | 72.13 | 0.529 | 72.23 | 1.262 |
| 71.17 | 0.061 | 72.27 | 0.048 | 71.24 | 0.073 | 71.30 | 0.114 | 72.25 | 0.159 | 72.22 | 0.521 | 72.33 | 1.255 |

|       |       |       |       |       |       |       |       |       |       |       |       |       |       |
|-------|-------|-------|-------|-------|-------|-------|-------|-------|-------|-------|-------|-------|-------|
| 71.25 | 0.060 | 72.37 | 0.044 | 71.32 | 0.072 | 71.40 | 0.113 | 72.34 | 0.155 | 72.32 | 0.520 | 72.43 | 1.236 |
| 71.36 | 0.052 | 72.47 | 0.060 | 71.44 | 0.071 | 71.49 | 0.113 | 72.44 | 0.151 | 72.40 | 0.519 | 72.51 | 1.242 |
| 71.47 | 0.056 | 72.57 | 0.041 | 71.52 | 0.075 | 71.60 | 0.112 | 72.54 | 0.158 | 72.51 | 0.518 | 72.61 | 1.225 |
| 71.55 | 0.055 | 72.67 | 0.049 | 71.61 | 0.071 | 71.68 | 0.115 | 72.63 | 0.152 | 72.60 | 0.511 | 72.71 | 1.223 |
| 71.65 | 0.050 | 72.77 | 0.048 | 71.70 | 0.072 | 71.78 | 0.111 | 72.73 | 0.152 | 72.70 | 0.510 | 72.82 | 1.214 |
| 71.75 | 0.057 | 72.86 | 0.048 | 71.78 | 0.075 | 71.87 | 0.112 | 72.83 | 0.153 | 72.79 | 0.507 | 72.91 | 1.204 |
| 71.84 | 0.060 | 72.94 | 0.058 | 71.89 | 0.072 | 71.97 | 0.112 | 72.93 | 0.148 | 72.89 | 0.504 | 73.00 | 1.190 |
| 71.92 | 0.051 | 73.06 | 0.035 | 71.99 | 0.070 | 72.05 | 0.116 | 73.01 | 0.147 | 73.00 | 0.501 | 73.10 | 1.189 |
| 72.04 | 0.056 | 73.15 | 0.049 | 72.08 | 0.068 | 72.17 | 0.113 | 73.12 | 0.147 | 73.10 | 0.500 | 73.20 | 1.188 |
| 72.12 | 0.061 | 73.25 | 0.049 | 72.18 | 0.075 | 72.25 | 0.108 | 73.20 | 0.150 | 73.19 | 0.492 | 73.30 | 1.176 |
| 72.22 | 0.058 | 73.36 | 0.039 | 72.28 | 0.072 | 72.34 | 0.111 | 73.30 | 0.150 | 73.28 | 0.492 | 73.39 | 1.170 |
| 72.31 | 0.053 | 73.44 | 0.046 | 72.37 | 0.072 | 72.44 | 0.113 | 73.40 | 0.145 | 73.39 | 0.482 | 73.49 | 1.160 |
| 72.41 | 0.056 | 73.54 | 0.044 | 72.48 | 0.074 | 72.53 | 0.113 | 73.49 | 0.147 | 73.50 | 0.485 | 73.59 | 1.147 |
| 72.51 | 0.055 | 73.64 | 0.048 | 72.55 | 0.069 | 72.63 | 0.109 | 73.60 | 0.143 | 73.58 | 0.484 | 73.68 | 1.142 |
| 72.60 | 0.055 | 73.74 | 0.042 | 72.66 | 0.068 | 72.70 | 0.113 | 73.68 | 0.148 | 73.68 | 0.480 | 73.78 | 1.140 |
| 72.69 | 0.054 | 73.82 | 0.050 | 72.74 | 0.068 | 72.81 | 0.112 | 73.77 | 0.149 | 73.75 | 0.478 | 73.87 | 1.127 |
| 72.79 | 0.057 | 73.93 | 0.041 | 72.84 | 0.071 | 72.91 | 0.106 | 73.89 | 0.140 | 73.86 | 0.476 | 73.96 | 1.123 |
| 72.88 | 0.059 | 74.00 | 0.046 | 72.93 | 0.073 | 73.00 | 0.113 | 73.96 | 0.144 | 73.95 | 0.470 | 74.07 | 1.113 |
| 72.96 | 0.055 | 74.11 | 0.061 | 73.03 | 0.070 | 73.09 | 0.109 | 74.08 | 0.149 | 74.05 | 0.467 | 74.16 | 1.106 |
| 73.05 | 0.055 | 74.21 | 0.046 | 73.12 | 0.075 | 73.21 | 0.104 | 74.17 | 0.145 | 74.15 | 0.464 | 74.26 | 1.104 |
| 73.15 | 0.060 | 74.32 | 0.052 | 73.20 | 0.068 | 73.29 | 0.108 | 74.27 | 0.144 | 74.24 | 0.466 | 74.36 | 1.089 |
| 73.26 | 0.056 | 74.41 | 0.040 | 73.30 | 0.069 | 73.38 | 0.111 | 74.37 | 0.140 | 74.35 | 0.460 | 74.47 | 1.082 |
| 73.34 | 0.059 | 74.50 | 0.045 | 73.41 | 0.069 | 73.49 | 0.108 | 74.45 | 0.142 | 74.44 | 0.458 | 74.56 | 1.076 |
| 73.46 | 0.056 | 74.58 | 0.052 | 73.49 | 0.067 | 73.57 | 0.106 | 74.56 | 0.145 | 74.54 | 0.457 | 74.63 | 1.071 |
| 73.53 | 0.056 | 74.71 | 0.045 | 73.57 | 0.071 | 73.66 | 0.104 | 74.65 | 0.137 | 74.63 | 0.453 | 74.74 | 1.060 |
| 73.63 | 0.050 | 74.78 | 0.044 | 73.68 | 0.070 | 73.79 | 0.105 | 74.74 | 0.143 | 74.73 | 0.448 | 74.84 | 1.050 |
| 73.73 | 0.058 | 74.87 | 0.044 | 73.78 | 0.068 | 73.87 | 0.108 | 74.84 | 0.138 | 74.84 | 0.450 | 74.93 | 1.045 |
| 73.82 | 0.056 | 74.99 | 0.048 | 73.87 | 0.068 | 73.96 | 0.103 | 74.93 | 0.140 | 74.93 | 0.448 | 75.04 | 1.036 |
| 73.92 | 0.055 | 75.07 | 0.047 | 73.97 | 0.068 | 74.04 | 0.102 | 75.03 | 0.137 | 75.02 | 0.443 | 75.14 | 1.032 |
| 73.99 | 0.054 | 75.18 | 0.042 | 74.05 | 0.070 | 74.14 | 0.101 | 75.12 | 0.137 | 75.11 | 0.438 | 75.24 | 1.036 |
| 74.10 | 0.059 | 75.27 | 0.047 | 74.16 | 0.063 | 74.23 | 0.106 | 75.23 | 0.135 | 75.21 | 0.436 | 75.32 | 1.020 |
| 74.20 | 0.053 | 75.37 | 0.040 | 74.25 | 0.070 | 74.33 | 0.102 | 75.32 | 0.139 | 75.32 | 0.439 | 75.42 | 1.014 |
| 74.29 | 0.054 | 75.47 | 0.054 | 74.34 | 0.071 | 74.43 | 0.100 | 75.42 | 0.134 | 75.40 | 0.433 | 75.51 | 1.004 |
| 74.39 | 0.055 | 75.56 | 0.038 | 74.43 | 0.065 | 74.53 | 0.103 | 75.53 | 0.131 | 75.49 | 0.432 | 75.61 | 1.002 |
| 74.48 | 0.053 | 75.66 | 0.043 | 74.52 | 0.070 | 74.61 | 0.101 | 75.63 | 0.141 | 75.60 | 0.426 | 75.70 | 0.998 |
| 74.58 | 0.057 | 75.76 | 0.042 | 74.61 | 0.066 | 74.71 | 0.100 | 75.71 | 0.132 | 75.69 | 0.431 | 75.79 | 0.987 |
| 74.66 | 0.052 | 75.85 | 0.049 | 74.73 | 0.066 | 74.81 | 0.100 | 75.81 | 0.134 | 75.79 | 0.424 | 75.90 | 0.980 |
| 74.76 | 0.058 | 75.96 | 0.046 | 74.81 | 0.063 | 74.89 | 0.103 | 75.91 | 0.132 | 75.88 | 0.425 | 76.01 | 0.960 |
| 74.85 | 0.059 | 76.04 | 0.045 | 74.91 | 0.064 | 74.99 | 0.105 | 75.99 | 0.128 | 75.98 | 0.417 | 76.11 | 0.970 |
| 74.94 | 0.055 | 76.14 | 0.052 | 75.02 | 0.069 | 75.08 | 0.098 | 76.12 | 0.133 | 76.08 | 0.419 | 76.19 | 0.960 |
| 75.05 | 0.046 | 76.23 | 0.047 | 75.10 | 0.067 | 75.18 | 0.100 | 76.19 | 0.132 | 76.17 | 0.419 | 76.29 | 0.951 |
| 75.14 | 0.050 | 76.33 | 0.038 | 75.21 | 0.069 | 75.28 | 0.096 | 76.30 | 0.132 | 76.27 | 0.414 | 76.38 | 0.957 |

|       |       |       |       |       |       |       |       |       |       |       |       |       |       |
|-------|-------|-------|-------|-------|-------|-------|-------|-------|-------|-------|-------|-------|-------|
| 75.23 | 0.060 | 76.45 | 0.051 | 75.28 | 0.071 | 75.38 | 0.097 | 76.38 | 0.129 | 76.37 | 0.408 | 76.49 | 0.944 |
| 75.33 | 0.063 | 76.53 | 0.042 | 75.36 | 0.064 | 75.47 | 0.103 | 76.49 | 0.132 | 76.46 | 0.407 | 76.59 | 0.938 |
| 75.42 | 0.056 | 76.62 | 0.056 | 75.46 | 0.066 | 75.56 | 0.099 | 76.57 | 0.128 | 76.56 | 0.407 | 76.68 | 0.935 |
| 75.51 | 0.057 | 76.71 | 0.042 | 75.57 | 0.071 | 75.65 | 0.096 | 76.66 | 0.129 | 76.66 | 0.398 | 76.78 | 0.928 |
| 75.60 | 0.058 | 76.82 | 0.041 | 75.68 | 0.071 | 75.77 | 0.099 | 76.77 | 0.133 | 76.75 | 0.398 | 76.88 | 0.920 |
| 75.70 | 0.051 | 76.91 | 0.042 | 75.78 | 0.064 | 75.86 | 0.095 | 76.87 | 0.125 | 76.86 | 0.399 | 76.97 | 0.913 |
| 75.81 | 0.054 | 77.02 | 0.047 | 75.86 | 0.068 | 75.94 | 0.099 | 76.97 | 0.127 | 76.95 | 0.392 | 77.07 | 0.907 |
| 75.89 | 0.064 | 77.12 | 0.053 | 75.94 | 0.063 | 76.04 | 0.098 | 77.05 | 0.124 | 77.04 | 0.393 | 77.15 | 0.908 |
| 76.00 | 0.061 | 77.19 | 0.041 | 76.04 | 0.066 | 76.12 | 0.098 | 77.16 | 0.125 | 77.15 | 0.398 | 77.26 | 0.900 |
| 76.08 | 0.054 | 77.28 | 0.047 | 76.12 | 0.062 | 76.23 | 0.093 | 77.25 | 0.124 | 77.22 | 0.391 | 77.34 | 0.896 |
| 76.17 | 0.059 | 77.40 | 0.053 | 76.21 | 0.061 | 76.32 | 0.092 | 77.36 | 0.130 | 77.34 | 0.389 | 77.46 | 0.880 |
| 76.26 | 0.056 | 77.49 | 0.050 | 76.31 | 0.060 | 76.40 | 0.097 | 77.45 | 0.126 | 77.43 | 0.387 | 77.55 | 0.878 |
| 76.36 | 0.060 | 77.57 | 0.041 | 76.40 | 0.066 | 76.51 | 0.096 | 77.54 | 0.119 | 77.53 | 0.387 | 77.64 | 0.864 |
| 76.45 | 0.051 | 77.67 | 0.042 | 76.51 | 0.067 | 76.60 | 0.098 | 77.64 | 0.128 | 77.63 | 0.382 | 77.72 | 0.868 |
| 76.54 | 0.057 | 77.77 | 0.048 | 76.60 | 0.061 | 76.68 | 0.098 | 77.72 | 0.123 | 77.73 | 0.373 | 77.83 | 0.862 |
| 76.62 | 0.062 | 77.88 | 0.039 | 76.70 | 0.068 | 76.80 | 0.094 | 77.83 | 0.120 | 77.81 | 0.378 | 77.93 | 0.859 |
| 76.71 | 0.055 | 77.96 | 0.054 | 76.80 | 0.067 | 76.87 | 0.095 | 77.92 | 0.124 | 77.93 | 0.374 | 78.04 | 0.852 |
| 76.81 | 0.054 | 78.06 | 0.044 | 76.91 | 0.063 | 76.97 | 0.093 | 78.02 | 0.124 | 78.01 | 0.375 | 78.12 | 0.848 |
| 76.90 | 0.056 | 78.16 | 0.052 | 76.98 | 0.064 | 77.08 | 0.096 | 78.11 | 0.122 | 78.11 | 0.367 | 78.20 | 0.844 |
| 76.99 | 0.059 | 78.25 | 0.048 | 77.09 | 0.064 | 77.16 | 0.095 | 78.21 | 0.122 | 78.20 | 0.370 | 78.32 | 0.836 |
| 77.11 | 0.058 | 78.35 | 0.046 | 77.18 | 0.063 | 77.26 | 0.096 | 78.31 | 0.120 | 78.30 | 0.369 | 78.42 | 0.827 |
| 77.19 | 0.063 | 78.44 | 0.038 | 77.30 | 0.063 | 77.37 | 0.093 | 78.41 | 0.121 | 78.40 | 0.363 | 78.52 | 0.828 |
| 77.29 | 0.058 | 78.55 | 0.047 | 77.37 | 0.062 | 77.47 | 0.094 | 78.50 | 0.126 | 78.49 | 0.364 | 78.60 | 0.822 |
| 77.39 | 0.054 | 78.65 | 0.039 | 77.47 | 0.062 | 77.56 | 0.092 | 78.61 | 0.120 | 78.59 | 0.364 | 78.71 | 0.815 |
| 77.48 | 0.051 | 78.75 | 0.056 | 77.56 | 0.064 | 77.65 | 0.093 | 78.70 | 0.122 | 78.68 | 0.363 | 78.80 | 0.812 |
| 77.58 | 0.054 | 78.85 | 0.037 | 77.66 | 0.066 | 77.74 | 0.092 | 78.79 | 0.124 | 78.79 | 0.360 | 78.90 | 0.803 |
| 77.67 | 0.050 | 78.93 | 0.050 | 77.76 | 0.062 | 77.84 | 0.093 | 78.89 | 0.118 | 78.87 | 0.358 | 79.00 | 0.800 |
| 77.76 | 0.056 | 79.05 | 0.040 | 77.84 | 0.063 | 77.92 | 0.095 | 78.99 | 0.122 | 78.97 | 0.353 | 79.10 | 0.797 |
| 77.86 | 0.056 | 79.14 | 0.046 | 77.95 | 0.067 | 78.04 | 0.087 | 79.08 | 0.117 | 79.08 | 0.357 | 79.19 | 0.785 |
| 77.95 | 0.052 | 79.23 | 0.039 | 78.04 | 0.063 | 78.13 | 0.092 | 79.17 | 0.113 | 79.17 | 0.354 | 79.28 | 0.785 |
| 78.05 | 0.051 | 79.32 | 0.041 | 78.12 | 0.063 | 78.20 | 0.090 | 79.27 | 0.112 | 79.25 | 0.345 | 79.39 | 0.783 |
| 78.15 | 0.049 | 79.42 | 0.043 | 78.20 | 0.063 | 78.33 | 0.090 | 79.37 | 0.122 | 79.37 | 0.348 | 79.48 | 0.774 |
| 78.24 | 0.059 | 79.51 | 0.047 | 78.31 | 0.059 | 78.41 | 0.093 | 79.48 | 0.118 | 79.45 | 0.344 | 79.57 | 0.771 |
| 78.32 | 0.056 | 79.60 | 0.055 | 78.39 | 0.057 | 78.51 | 0.091 | 79.56 | 0.111 | 79.55 | 0.347 | 79.67 | 0.765 |
| 78.43 | 0.059 | 79.70 | 0.051 | 78.49 | 0.063 | 78.60 | 0.086 | 79.66 | 0.113 | 79.64 | 0.341 | 79.77 | 0.762 |
| 78.53 | 0.054 | 79.81 | 0.034 | 78.60 | 0.059 | 78.68 | 0.093 | 79.75 | 0.114 | 79.74 | 0.342 | 79.86 | 0.757 |
| 78.61 | 0.052 | 79.92 | 0.052 | 78.70 | 0.059 | 78.79 | 0.093 | 79.86 | 0.116 | 79.84 | 0.341 | 79.95 | 0.755 |
| 78.72 | 0.056 | 79.99 | 0.051 | 78.78 | 0.068 | 78.88 | 0.089 | 79.95 | 0.111 | 79.93 | 0.332 | 80.05 | 0.748 |
| 78.80 | 0.052 | 80.08 | 0.041 | 78.88 | 0.062 | 78.96 | 0.090 | 80.05 | 0.119 | 80.03 | 0.332 | 80.13 | 0.744 |
| 78.91 | 0.053 | 80.14 | 0.040 | 78.96 | 0.064 | 79.08 | 0.089 | 80.12 | 0.109 | 80.11 | 0.340 | 80.17 | 0.751 |
| 79.00 | 0.051 | 80.17 | 0.041 | 79.06 | 0.062 | 79.16 | 0.090 | 80.16 | 0.109 | 80.16 | 0.332 | 80.17 | 0.743 |
| 79.08 | 0.058 | 80.20 | 0.042 | 79.15 | 0.063 | 79.24 | 0.088 | 80.19 | 0.110 | 80.20 | 0.335 | 80.20 | 0.736 |

|       |       |       |       |       |       |       |       |       |       |       |       |       |       |
|-------|-------|-------|-------|-------|-------|-------|-------|-------|-------|-------|-------|-------|-------|
| 79.19 | 0.046 | 80.21 | 0.050 | 79.25 | 0.059 | 79.34 | 0.090 | 80.21 | 0.112 | 80.22 | 0.336 | 80.21 | 0.741 |
| 79.27 | 0.054 | 80.23 | 0.041 | 79.36 | 0.064 | 79.43 | 0.088 | 80.23 | 0.114 | 80.22 | 0.331 | 80.20 | 0.746 |
| 79.38 | 0.060 | 80.22 | 0.034 | 79.45 | 0.060 | 79.52 | 0.090 | 80.23 | 0.116 | 80.23 | 0.335 | 80.19 | 0.741 |
| 79.48 | 0.054 | 80.24 | 0.058 | 79.55 | 0.070 | 79.62 | 0.088 | 80.23 | 0.113 | 80.23 | 0.329 | 80.19 | 0.744 |
| 79.58 | 0.055 | 80.21 | 0.038 | 79.64 | 0.060 | 79.72 | 0.089 | 80.22 | 0.115 | 80.23 | 0.333 | 80.16 | 0.744 |
| 79.66 | 0.057 | 80.22 | 0.047 | 79.71 | 0.062 | 79.81 | 0.085 | 80.20 | 0.116 | 80.20 | 0.336 | 80.15 | 0.752 |
| 79.77 | 0.052 | 80.20 | 0.052 | 79.83 | 0.062 | 79.90 | 0.087 | 80.18 | 0.114 | 80.20 | 0.334 | 80.11 | 0.746 |
| 79.86 | 0.052 | 80.16 | 0.038 | 79.93 | 0.064 | 80.00 | 0.083 | 80.15 | 0.113 | 80.16 | 0.332 | 80.08 | 0.748 |
| 79.95 | 0.054 | 80.16 | 0.044 | 80.02 | 0.060 | 80.08 | 0.085 | 80.13 | 0.114 | 80.15 | 0.334 | 80.06 | 0.754 |
| 80.05 | 0.059 | 80.13 | 0.048 | 80.10 | 0.061 | 80.14 | 0.089 | 80.11 | 0.116 | 80.12 | 0.341 | 80.05 | 0.751 |
| 80.11 | 0.053 | 80.09 | 0.040 | 80.15 | 0.058 | 80.16 | 0.086 | 80.09 | 0.114 | 80.10 | 0.336 | 80.03 | 0.747 |
| 80.15 | 0.060 | 80.09 | 0.051 | 80.19 | 0.064 | 80.19 | 0.085 | 80.07 | 0.114 | 80.08 | 0.338 | 80.03 | 0.751 |
| 80.18 | 0.052 | 80.06 | 0.039 | 80.22 | 0.061 | 80.20 | 0.086 | 80.06 | 0.119 | 80.06 | 0.338 | 80.01 | 0.747 |
| 80.20 | 0.052 | 80.04 | 0.038 | 80.22 | 0.068 | 80.20 | 0.087 | 80.03 | 0.114 | 80.03 | 0.339 | 79.99 | 0.755 |
| 80.22 | 0.058 | 80.02 | 0.045 | 80.23 | 0.058 | 80.18 | 0.086 | 80.01 | 0.114 | 80.01 | 0.343 | 79.99 | 0.746 |
| 80.22 | 0.058 | 80.02 | 0.047 | 80.22 | 0.058 | 80.18 | 0.088 | 80.01 | 0.113 | 80.00 | 0.336 | 79.97 | 0.751 |
| 80.22 | 0.054 | 79.98 | 0.058 | 80.21 | 0.057 | 80.15 | 0.084 | 80.00 | 0.113 | 80.00 | 0.338 | 79.98 | 0.752 |
| 80.22 | 0.055 | 79.99 | 0.034 | 80.20 | 0.060 | 80.13 | 0.088 | 79.99 | 0.118 | 79.99 | 0.336 | 79.97 | 0.745 |
| 80.19 | 0.059 | 79.98 | 0.047 | 80.20 | 0.066 | 80.12 | 0.087 | 79.98 | 0.116 | 79.99 | 0.346 | 79.97 | 0.759 |
| 80.17 | 0.060 | 79.97 | 0.034 | 80.16 | 0.060 | 80.09 | 0.087 | 79.98 | 0.115 | 79.96 | 0.343 | 79.96 | 0.751 |
| 80.15 | 0.048 | 79.98 | 0.060 | 80.14 | 0.063 | 80.08 | 0.089 | 79.97 | 0.117 | 79.97 | 0.339 | 79.96 | 0.745 |
| 80.13 | 0.055 | 79.96 | 0.033 | 80.11 | 0.059 | 80.07 | 0.090 | 79.98 | 0.112 | 79.97 | 0.337 | 79.97 | 0.748 |
| 80.11 | 0.055 | 79.98 | 0.040 | 80.08 | 0.063 | 80.04 | 0.084 | 79.98 | 0.111 | 79.97 | 0.339 | 79.98 | 0.754 |
| 80.09 | 0.054 | 79.97 | 0.051 | 80.08 | 0.061 | 80.02 | 0.086 | 79.97 | 0.116 | 79.96 | 0.339 | 80.00 | 0.755 |
| 80.07 | 0.055 | 79.98 | 0.040 | 80.05 | 0.061 | 80.00 | 0.085 | 79.98 | 0.115 | 79.96 | 0.340 | 79.98 | 0.753 |
| 80.05 | 0.053 | 79.97 | 0.061 | 80.03 | 0.060 | 79.99 | 0.087 | 79.97 | 0.115 | 79.98 | 0.341 | 80.00 | 0.754 |
| 80.04 | 0.057 | 79.97 | 0.027 | 80.02 | 0.064 | 79.99 | 0.086 | 79.99 | 0.116 | 79.98 | 0.337 | 80.01 | 0.751 |
| 80.02 | 0.053 | 79.98 | 0.044 | 80.00 | 0.061 | 79.99 | 0.089 | 79.98 | 0.116 | 79.99 | 0.339 | 79.99 | 0.747 |
| 80.01 | 0.058 | 80.01 | 0.042 | 80.00 | 0.062 | 79.97 | 0.089 | 79.99 | 0.119 | 80.00 | 0.342 | 80.01 | 0.746 |
| 80.01 | 0.057 | 79.99 | 0.052 | 79.98 | 0.063 | 79.98 | 0.088 | 80.00 | 0.118 | 79.99 | 0.340 | 80.00 | 0.753 |
| 80.00 | 0.048 | 79.98 | 0.034 | 79.99 | 0.063 | 79.97 | 0.086 | 79.99 | 0.112 | 80.00 | 0.342 | 80.00 | 0.745 |
| 79.99 | 0.053 | 79.99 | 0.050 | 79.97 | 0.062 | 79.99 | 0.087 | 80.00 | 0.118 | 80.00 | 0.340 | 79.99 | 0.748 |
| 79.99 | 0.055 | 80.01 | 0.037 | 79.96 | 0.067 | 79.98 | 0.090 | 80.00 | 0.115 | 80.00 | 0.342 | 80.00 | 0.750 |
| 79.97 | 0.047 | 80.01 | 0.047 | 79.96 | 0.062 | 79.99 | 0.083 | 80.00 | 0.112 | 80.01 | 0.340 | 80.01 | 0.741 |
| 79.99 | 0.055 | 80.02 | 0.047 | 79.96 | 0.060 | 79.99 | 0.090 | 80.02 | 0.113 | 80.01 | 0.337 | 80.02 | 0.752 |
| 79.98 | 0.059 | 80.01 | 0.044 | 79.97 | 0.058 | 79.98 | 0.090 | 80.00 | 0.116 | 80.02 | 0.341 | 80.02 | 0.754 |
| 79.98 | 0.053 | 80.01 | 0.048 | 79.97 | 0.065 | 79.98 | 0.084 | 80.01 | 0.114 | 80.02 | 0.340 | 80.00 | 0.744 |
| 79.97 | 0.050 | 80.02 | 0.045 | 79.99 | 0.060 | 80.00 | 0.087 | 80.02 | 0.112 | 80.02 | 0.344 | 80.00 | 0.758 |
| 79.99 | 0.053 | 80.00 | 0.045 | 79.99 | 0.063 | 79.98 | 0.089 | 80.01 | 0.118 | 80.01 | 0.337 | 80.01 | 0.745 |
| 79.98 | 0.060 | 80.00 | 0.043 | 79.98 | 0.060 | 79.98 | 0.085 | 80.01 | 0.121 | 80.01 | 0.344 | 80.00 | 0.746 |
| 79.99 | 0.058 | 80.00 | 0.041 | 79.98 | 0.059 | 79.99 | 0.092 | 80.01 | 0.113 | 80.02 | 0.339 | 80.01 | 0.751 |
| 79.99 | 0.053 | 80.00 | 0.040 | 79.98 | 0.063 | 79.99 | 0.089 | 80.00 | 0.115 | 80.02 | 0.339 | 80.01 | 0.745 |

|       |       |       |       |       |       |       |       |       |       |       |       |       |       |
|-------|-------|-------|-------|-------|-------|-------|-------|-------|-------|-------|-------|-------|-------|
| 80.00 | 0.057 | 80.00 | 0.052 | 80.00 | 0.059 | 80.00 | 0.085 | 80.02 | 0.116 | 80.01 | 0.341 | 80.01 | 0.743 |
| 80.00 | 0.057 | 79.99 | 0.044 | 79.99 | 0.065 | 80.00 | 0.092 | 80.00 | 0.113 | 80.01 | 0.335 | 80.00 | 0.752 |
| 79.99 | 0.054 | 80.02 | 0.038 | 79.99 | 0.063 | 80.02 | 0.085 | 80.00 | 0.115 | 80.01 | 0.340 | 80.00 | 0.753 |
| 79.99 | 0.057 | 80.01 | 0.046 | 80.02 | 0.065 | 80.01 | 0.082 | 80.00 | 0.118 | 80.01 | 0.338 | 79.99 | 0.754 |
| 80.01 | 0.056 | 80.00 | 0.038 | 80.00 | 0.065 | 80.01 | 0.086 | 80.01 | 0.114 | 80.01 | 0.335 | 80.01 | 0.749 |
| 80.01 | 0.058 | 80.01 | 0.047 | 80.01 | 0.060 | 80.00 | 0.088 | 80.01 | 0.111 | 80.01 | 0.338 | 79.99 | 0.743 |
| 80.01 | 0.054 |       |       | 80.03 | 0.056 | 80.00 | 0.087 | 80.01 | 0.112 | 80.00 | 0.335 |       |       |
| 80.01 | 0.051 |       |       | 80.02 | 0.064 | 80.02 | 0.093 |       |       |       |       |       |       |
| 80.01 | 0.052 |       |       | 80.01 | 0.061 | 80.01 | 0.083 |       |       |       |       |       |       |
| 80.00 | 0.052 |       |       | 80.02 | 0.062 | 80.01 | 0.088 |       |       |       |       |       |       |
| 80.02 | 0.058 |       |       | 80.01 | 0.058 | 80.00 | 0.086 |       |       |       |       |       |       |
| 80.02 | 0.050 |       |       | 80.01 | 0.062 | 80.01 | 0.089 |       |       |       |       |       |       |
| 80.01 | 0.051 |       |       | 80.03 | 0.057 | 80.00 | 0.088 |       |       |       |       |       |       |
| 80.01 | 0.056 |       |       | 80.01 | 0.059 | 80.01 | 0.085 |       |       |       |       |       |       |
| 80.01 | 0.051 |       |       | 80.01 | 0.057 | 80.01 | 0.086 |       |       |       |       |       |       |
| 80.00 | 0.050 |       |       | 80.01 | 0.063 | 80.01 | 0.086 |       |       |       |       |       |       |
| 80.01 | 0.055 |       |       | 80.02 | 0.064 | 80.01 | 0.087 |       |       |       |       |       |       |
| 80.00 | 0.059 |       |       | 80.02 | 0.059 | 80.00 | 0.084 |       |       |       |       |       |       |
| 80.00 | 0.054 |       |       | 80.03 | 0.066 | 80.01 | 0.082 |       |       |       |       |       |       |
| 80.00 | 0.054 |       |       | 80.02 | 0.062 |       |       |       |       |       |       |       |       |
| 80.01 | 0.051 |       |       |       |       |       |       |       |       |       |       |       |       |

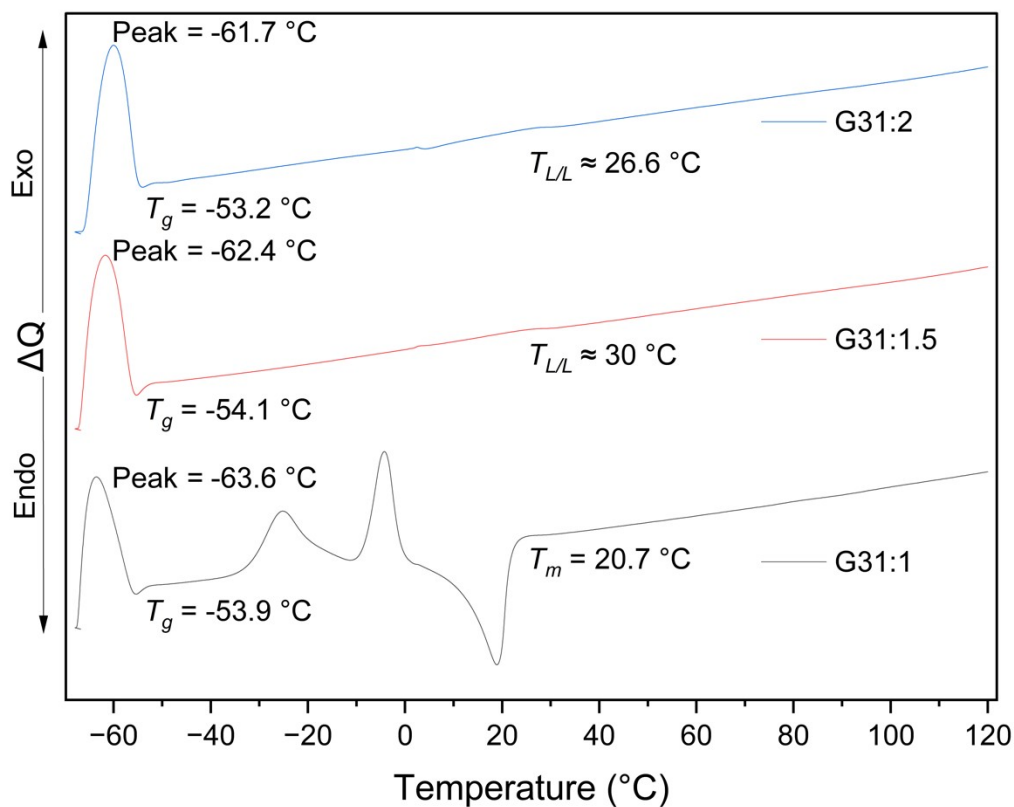

Fig S17. DSC trace of G3-1:1, G3-1:1.5 and G3-1:2 samples on the heating cycle from -70 °C.

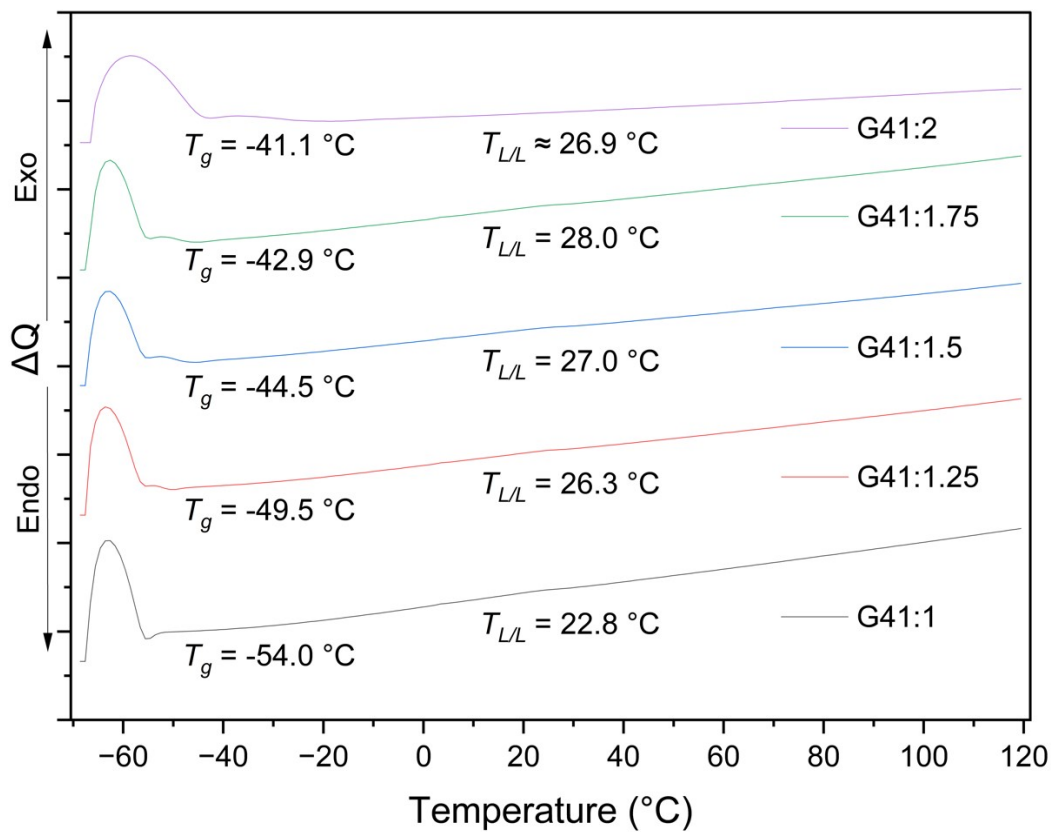

Fig S18. DSC trace of G4-1:1, G4-1:1.25, G4-1:1.5, G4-1:1.75 and G4-1:2 on the heating cycle from -70 °C.



**Table S14.**  $T_d$ (°C) values for SIL samples.

| Ether:LiTFSI | $T_d$ (°C) |
|--------------|------------|
| G3-1:1       | 212.1      |
| G3-1:1.5     | 242.0      |
| G3-1:2       | 268.3      |
| G3-1:2.5     | 279.5      |
| G3-1:3       | 290.7      |
| G3-1:3.5     | 312.6      |
| G3-1:4       | 328.0      |
| G4-1:1       | 204.5      |
| G4-1:1.25    | 227.4      |
| G4-1:1.5     | 254.2      |
| G4-1:1.75    | 266.4      |
| G4-1:2       | 272.4      |
| G4-1:2.5     | 307.1      |
| G4-1:3       | 316.1      |

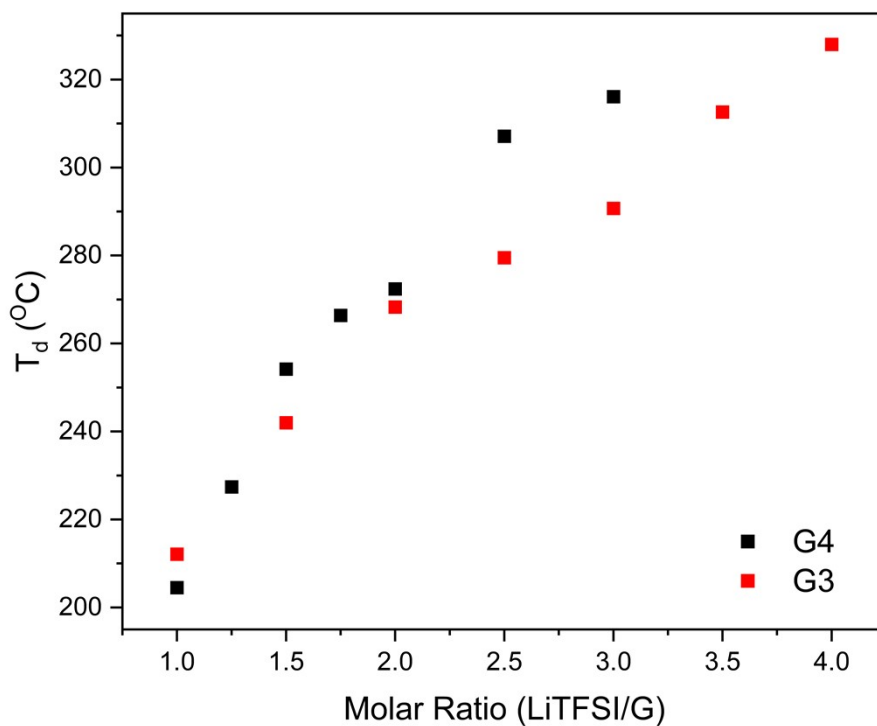

**Fig S19.** Plot without connecting lines, presented to avoid misleading false cusps line connected point graphs, showing  $T_d$  °C for G3 and G4 samples.

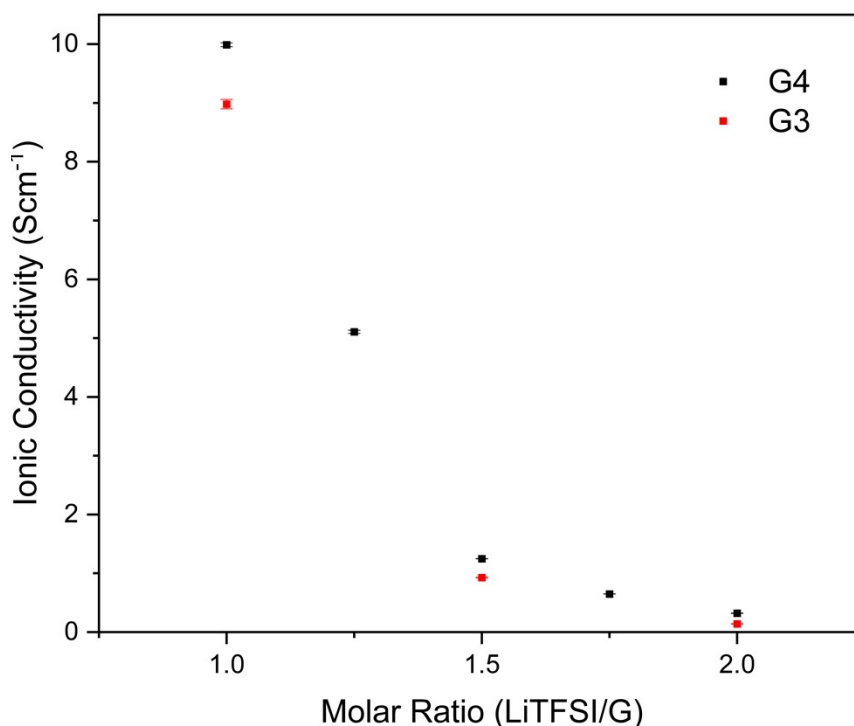

**Fig S20.** Plot without connecting lines, presented to avoid misleading false cusps line connected point graphs. Ionic conductivity values with standard error for G3&G4-1:1 through to 1:2 SIL samples.

**Table S15.** Average SIL ionic conductivity values, with calculated standard deviation & standard error.

| Ether:LiTFSI | $\bar{\delta}$ Average (S cm <sup>-1</sup> ) | Standard Deviation    | Standard Error        |
|--------------|----------------------------------------------|-----------------------|-----------------------|
| G3-1:1       | $8.98 \times 10^0$                           | $2.44 \times 10^{-1}$ | $8.13 \times 10^{-2}$ |
| G3-1:1.5     | $9.28 \times 10^{-1}$                        | $2.78 \times 10^{-2}$ | $9.28 \times 10^{-3}$ |
| G3-1:2       | $1.40 \times 10^{-1}$                        | $8.15 \times 10^{-3}$ | $2.72 \times 10^{-3}$ |
| G4-1:1       | $9.99 \times 10^0$                           | $2.92 \times 10^{-1}$ | $3.25 \times 10^{-2}$ |
| G4-1:1.25    | $5.11 \times 10^0$                           | $2.40 \times 10^{-1}$ | $2.67 \times 10^{-2}$ |
| G4-1:1.5     | $1.25 \times 10^0$                           | $1.58 \times 10^{-2}$ | $1.75 \times 10^{-3}$ |
| G4-1:1.75    | $6.48 \times 10^{-1}$                        | $2.35 \times 10^{-2}$ | $2.61 \times 10^{-3}$ |
| G4-1:2       | $3.20 \times 10^{-1}$                        | $1.99 \times 10^{-2}$ | $2.21 \times 10^{-3}$ |

**Table S16.** G4 SIL ionic conductivity and raw resistance values obtained from EIS measurements.

| Sample    | Test No. | Resistance (Ohm) by EIS | $\bar{\delta}$ (S cm <sup>-1</sup> ) |
|-----------|----------|-------------------------|--------------------------------------|
| G4 1:1    | 1        | 909                     | 10.65                                |
| G4 1:1    | 2        | 836                     | 9.68                                 |
| G4 1:1    | 3        | 919                     | 9.68                                 |
| G4 1:1    | 4        | 911                     | 9.77                                 |
| G4 1:1    | 5        | 904                     | 9.85                                 |
| G4 1:1    | 6        | 899                     | 9.90                                 |
| G4 1:1    | 7        | 888                     | 10.02                                |
| G4 1:1    | 8        | 878                     | 10.14                                |
| G4 1:1    | 9        | 871                     | 10.22                                |
| G4 1:1.25 | 1        | 1588                    | 5.60                                 |
| G4 1:1.25 | 2        | 1675                    | 5.31                                 |
| G4 1:1.25 | 3        | 1702                    | 5.23                                 |

|           |   |       |      |
|-----------|---|-------|------|
| G4 1:1.25 | 4 | 1703  | 5.23 |
| G4 1:1.25 | 5 | 1772  | 5.02 |
| G4 1:1.25 | 6 | 1810  | 4.92 |
| G4 1:1.25 | 7 | 1815  | 4.90 |
| G4 1:1.25 | 8 | 1829  | 4.87 |
| G4 1:1.25 | 9 | 1828  | 4.87 |
| G4 1:1.5  | 1 | 7303  | 1.22 |
| G4 1:1.5  | 2 | 7150  | 1.24 |
| G4 1:1.5  | 3 | 7065  | 1.26 |
| G4 1:1.5  | 4 | 7082  | 1.26 |
| G4 1:1.5  | 5 | 6925  | 1.29 |
| G4 1:1.5  | 6 | 7157  | 1.24 |
| G4 1:1.5  | 7 | 7333  | 1.21 |
| G4 1:1.5  | 8 | 7190  | 1.24 |
| G4 1:1.5  | 9 | 6938  | 1.28 |
| G4 1:1.75 | 1 | 14431 | 0.62 |
| G4 1:1.75 | 2 | 13833 | 0.64 |
| G4 1:1.75 | 3 | 13767 | 0.65 |
| G4 1:1.75 | 4 | 13719 | 0.65 |
| G4 1:1.75 | 5 | 13580 | 0.66 |
| G4 1:1.75 | 6 | 13735 | 0.65 |
| G4 1:1.75 | 7 | 13862 | 0.64 |
| G4 1:1.75 | 8 | 13698 | 0.65 |
| G4 1:1.75 | 9 | 13053 | 0.68 |
| G4 1:2    | 1 | 28557 | 0.31 |
| G4 1:2    | 2 | 29596 | 0.30 |
| G4 1:2    | 3 | 29537 | 0.30 |
| G4 1:2    | 4 | 29311 | 0.30 |
| G4 1:2    | 5 | 28519 | 0.31 |
| G4 1:2    | 6 | 27723 | 0.32 |
| G4 1:2    | 7 | 26944 | 0.33 |
| G4 1:2    | 8 | 26321 | 0.34 |
| G4 1:2    | 9 | 24397 | 0.36 |

**Table S17.** G3 SIL ionic conductivity and raw resistance values obtained from EIS measurements.

| Sample | Test No. | Resistance   |                                |
|--------|----------|--------------|--------------------------------|
|        |          | (Ohm) by EIS | $\delta$ (S cm <sup>-1</sup> ) |
| G3 1:1 | 1        | 930          | 9.570                          |
| G3 1:1 | 2        | 969          | 9.185                          |
| G3 1:1 | 3        | 987          | 9.017                          |
| G3 1:1 | 4        | 994          | 8.954                          |
| G3 1:1 | 5        | 999          | 8.909                          |

|             |   |       |       |
|-------------|---|-------|-------|
| G3 1:1      | 6 | 1010  | 8.812 |
| G3 1:1      | 7 | 1013  | 8.786 |
| G3 1:1      | 8 | 1015  | 8.768 |
| G3 1:1      | 9 | 1010  | 8.812 |
| G3<br>1:1.5 | 1 | 9161  | 0.972 |
| G3<br>1:1.5 | 2 | 9803  | 0.908 |
| G3<br>1:1.5 | 3 | 10127 | 0.879 |
| G3<br>1:1.5 | 4 | 9815  | 0.907 |
| G3<br>1:1.5 | 5 | 9706  | 0.917 |
| G3<br>1:1.5 | 6 | 9675  | 0.920 |
| G3<br>1:1.5 | 7 | 9454  | 0.941 |
| G3<br>1:1.5 | 8 | 9403  | 0.947 |
| G3<br>1:1.5 | 9 | 9260  | 0.961 |
| G3 1:2      | 1 | 70346 | 0.127 |
| G3 1:2      | 2 | 69159 | 0.129 |
| G3 1:2      | 3 | 64343 | 0.138 |
| G3 1:2      | 4 | 63365 | 0.140 |
| G3 1:2      | 5 | 63000 | 0.141 |
| G3 1:2      | 6 | 62861 | 0.142 |
| G3 1:2      | 7 | 62122 | 0.143 |
| G3 1:2      | 8 | 58860 | 0.151 |
| G3 1:2      | 9 | 58519 | 0.152 |

**Table S18.** Linear line of best fit equations, for G4 ionic conductivity values, used to extrapolate the increased % of LiTFSI that can be added to G4 while maintaining the same ionic conductivity as G3-1:1 (8.98 S cm<sup>-1</sup>).

| Line of Best Fit Data Points | Line of Best Fit Equation | Extrapolated G4                     |                                 | R <sup>2</sup> |
|------------------------------|---------------------------|-------------------------------------|---------------------------------|----------------|
|                              |                           | LiTFSI ratio. y= G3-1:1<br>$\delta$ | Additional % of LiTFSI in ratio |                |
| G4 1:1, 1:1.25 & 1:1.5       | y=-4.3702x +14.189        | 1.19                                | 19%                             | 0.995          |
| G4 1:1 to 1:1.5              | y=-8.7404x +18.73         | 1.12                                | 12%                             | 1              |
| G4 1:1 to 1:1.25             | y=-4.8839x +14.874        | 1.21                                | 21%                             | 1              |

## Molecular Dynamics Methodology and Simulation Details

All the simulations were conducted in the GROMACS software package.<sup>1</sup> The G3 and G4 molecules were modelled using the optimized potentials for liquid simulations all-atom (OPLS-AA) force field.<sup>2</sup> The Li(TFSI) was modelled using the force field based on OPLS-AA developed by Canongia-Lopes and Pádua *et al.*<sup>3-6</sup> The charges of all atoms in the ionic species – Li<sup>+</sup> and TFSI<sup>-</sup> - were scaled down by a factor of 0.8 which is in-line with recent work by Thum *et al.* finding that lithium-glyme coordination is stronger than previously predicted.<sup>5</sup> The Nosé-Hoover thermostat<sup>7,8</sup> (coupling constant of 0.2 ps) and the Berendsen barostat<sup>9</sup> (coupling constant of 1.0 ps and compressibility of  $4.5 \times 10^{-5} \text{ bar}^{-1}$ ) were used to control the temperature and pressure respectively. A timestep of 1 fs was used for all equilibration and production runs and trajectories were written every 1 ps. A leap-frog integrator was used for the integration of Newton's equations of motion. Linear constraint solver (LINCS) algorithm<sup>10</sup> was used to constrain the hydrogen bonds. Coulomb and van der Waals cut-offs were set to 1.6 nm. Coulombic interactions beyond the cut-off were handled using the particle mesh Ewald (PME) method.<sup>11,12</sup>

Packmol was used to randomly pack 100 G3, 100 Li<sup>+</sup> and 100 TFSI<sup>-</sup> into a large low-density simulation cell for the G3-1:1 system.<sup>13</sup> Similarly, 100 G4, 100 Li<sup>+</sup> and 100 TFSI<sup>-</sup> made up the G4-1:1 system and 100 G4, 125 Li<sup>+</sup> and 125 TFSI<sup>-</sup> were packed into a cell for the G4-1:1.25 system.

These cell contents were minimised within GROMACS using the steepest descent algorithm. After this, the cells were subjected to high pressure to get rid of any holes and achieve a liquid density. This was done using constant temperature and pressure simulations (*NPT*) with 100 bar of pressure for 2 ns at 298.15 K. After this, *NPT* equilibration was done for 30 ns at 1 bar until a stable density was obtained. The densities obtained at this step were 1.457 g cm<sup>-3</sup>, 1.398 g cm<sup>-3</sup> and 1.468 g cm<sup>-3</sup> for G3-1:1, G4-1:1 and G4-1:1.25 respectively. These reproduce experimental densities reported in the literature of 1.46 g cm<sup>-3</sup> and 1.40 g cm<sup>-3</sup> for G3-1:1 and G4-1:1 successfully.<sup>14</sup>

The samples were then annealed to adequately mix the contents by heating up from 298.15 K to 1000 K in 200 ps, holding the temperature at 1000 K for 2.5 ns and cooling down to 298.15 K in 500 ps. The temperature was kept at 298.15 K for 200 ps during which radial distribution functions (RDFs) were collected over 200 frames. This cycle was repeated until two consecutive RDFs looked consistent with each other. This meant that the annealing was cycled 8 times. The final frame was then used for a 5 ns *NVT* production run. G4-1:1 and G4-1:1.25 were also repeated at higher temperatures of 500 K and 700 K. We conducted analysis of coordination numbers (CN), denticity of the G3 and G4 and coordination of TFSI<sup>-</sup> to lithium using in-house python codes and radial distribution functions using GROMACS analysis modules. The coordination number histograms were calculated using atom-atom cut-offs which were taken from the first minimum of the RDF for the respective atoms. The cut-offs used were 2.9 Å for both Li- O(TFSI) and Li-O(G3/G4). The RDFs and distribution of coordination numbers (CN) are shown below in Fig. S21 and S22. The CN of TFSI<sup>-</sup> to lithium ions is shown in Fig. S23. The trajectories were visualised using the Visual Molecular Dynamics software (VMD).<sup>15</sup>

The self-diffusion coefficients  $D_A$  are calculated using the Einstein relation shown in equation (1).

$$\lim_{t \rightarrow \infty} \langle \|r_i(t + \Delta t) - r_i(t)\|^2 \rangle_{i \in A} = 6D_A t \quad (1)$$

Here,  $\langle \|r_i(t + \Delta t) - r_i(t)\|^2 \rangle$  is the distance an atom or molecule has travelled over time,  $\Delta t$ , also known as the mean square displacement (MSD). This is averaged over all starting times  $t$  and over all atoms or molecules of the same type. The slope of the plot of MSD as a function of time yields  $D_A$ . These values were calculated for Li<sup>+</sup>, N(TFSI) and O(G4) and are shown in Table S19.

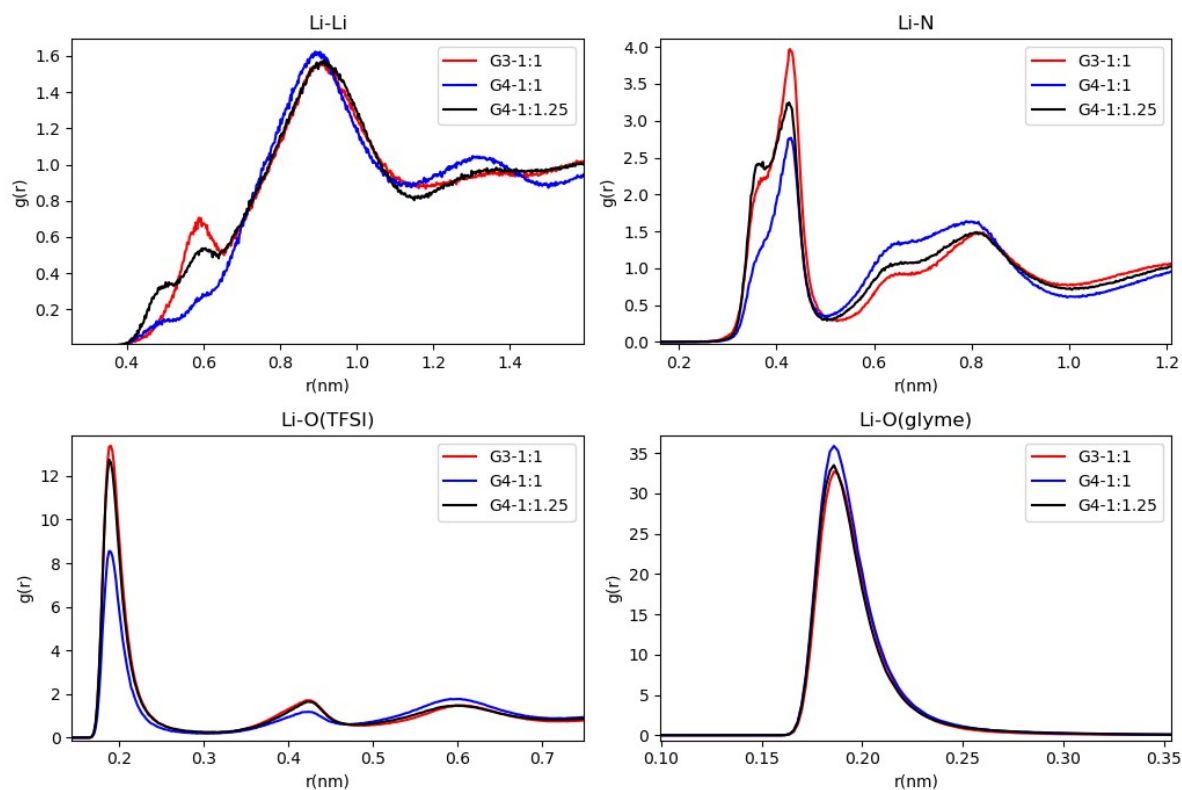

**Fig S21.** Radial distribution functions of G3-1:1, G4-1:1 and G4-1:1.25. The atom-atom selections are in the title of each of the plots.

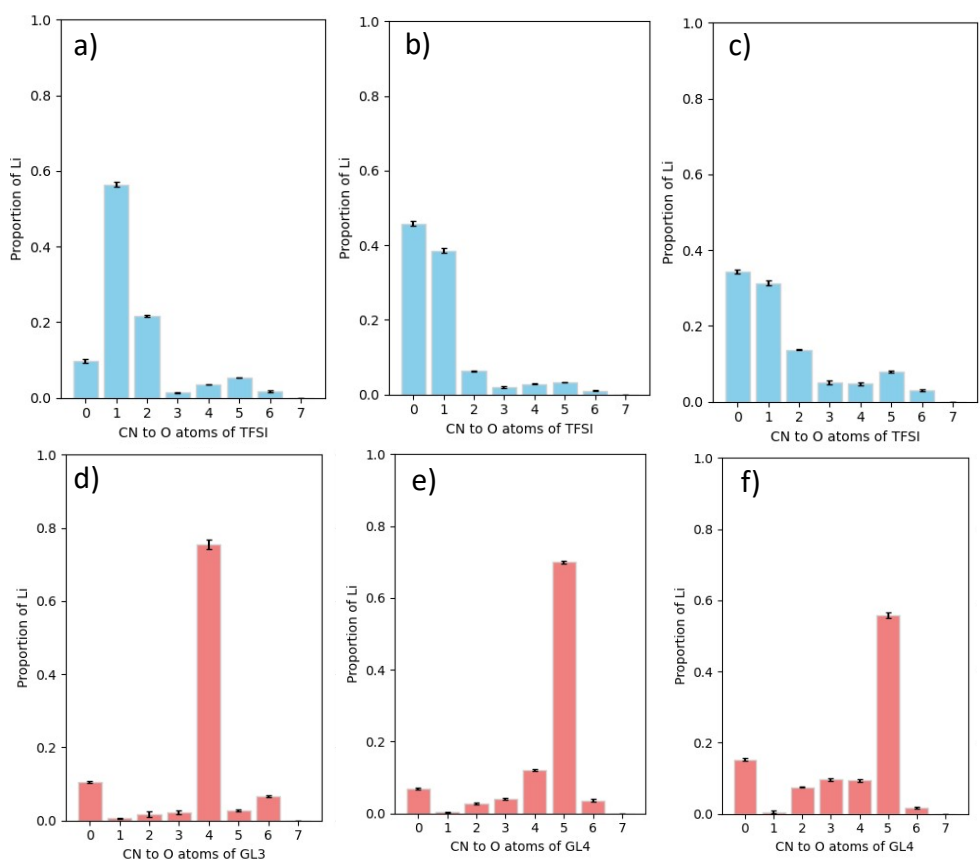

**Fig S22.** Coordination number distributions of Li-O(TFSI) are in (a), (b) and (c). Coordination number distributions of Li-O(glyme) are in (d), (e) and (f). (a) and (d) are coordination number distribution histograms for G3-1:1. (b)

and (e) are coordination number distribution histograms for G4-1:1. (c) and (f) are coordination number distribution histograms for G4-1:1.25.

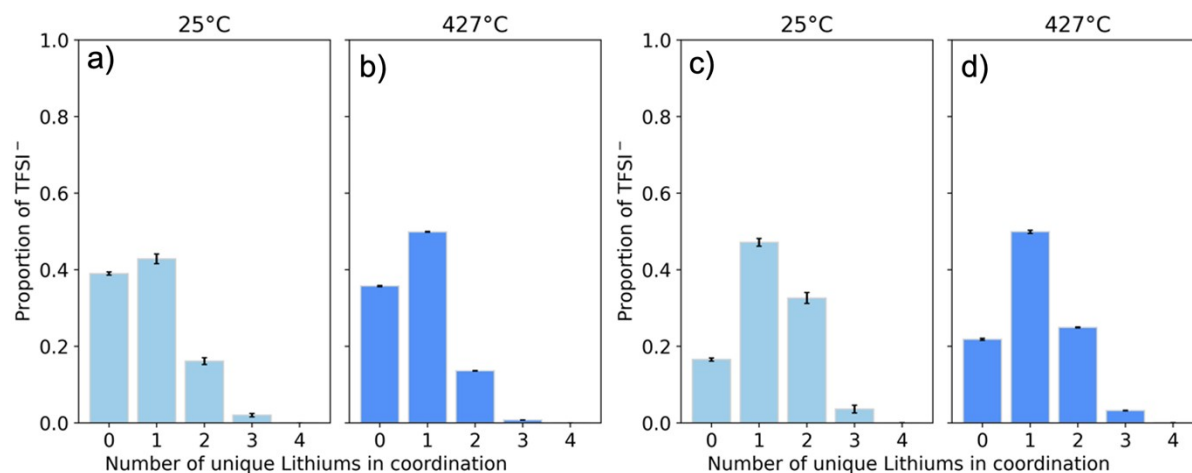

**Fig S23.** (a) and (b) are histograms showing the distribution of coordination number of TFSI<sup>-</sup> to single lithium ions in G4-1:1 at the respective temperatures of 227 °C and 427 °C. (c) and (d) are histograms showing the coordination number distribution of TFSI<sup>-</sup> to single lithium ions in G4-1:1.25 at the respective temperatures of 227 °C and 427 °C.

**Table S19.** Self-diffusion coefficients of Li<sup>+</sup>, [TFSI]<sup>-</sup> and O(G4) in G4-1:1 in 10<sup>-7</sup> cm<sup>2</sup> s<sup>-1</sup>

| Temperature (°C)                                      | D(Li <sup>+</sup> ) | D(N(TFSI) <sup>-</sup> ) | D(O(G4))       |
|-------------------------------------------------------|---------------------|--------------------------|----------------|
| <i>MD simulations – this paper</i>                    |                     |                          |                |
| 227                                                   | 52.02 (±1.06)       | 56.63 (±3.23)            | 53.10 (±1.46)  |
| 427                                                   | 96.16 (±16.02)      | 113.12 (±6.56)           | 96.69 (±10.69) |
| <i>MD simulations – Thum et al.<sup>16</sup></i>      |                     |                          |                |
| 227                                                   | 53                  | 59                       | 54             |
| <i>MD simulations – Dong and Bedrov.<sup>17</sup></i> |                     |                          |                |
| 30                                                    | 0.41                | 0.40                     | 0.41           |
| 80                                                    | 0.32                | 0.36                     | 0.39           |
| <i>Experiments – this paper</i>                       |                     |                          |                |
| 30                                                    | 1.01                | 1.04                     | 0.87           |
| 80                                                    | 27.90               | 7.08                     | 6.33           |
| <i>Experiments – Zhang et al.<sup>18</sup></i>        |                     |                          |                |
| 30                                                    | 1.26                | 1.22                     | 1.26           |
| <i>Experiments – Yoshida et al.<sup>19</sup></i>      |                     |                          |                |
| 30                                                    | 1.31                | 1.22                     | 1.29           |
| 80                                                    | 9.26                | 9.54                     | 8.98           |

<sup>16</sup>OPLS-AA force field for G4 and Canongia-Lopes and Pádua's force field for the ions with scaled charges.

<sup>17</sup>Atomistic Polarizable Potential for Liquids, Electrolytes and Polymers (APPLE&P) force field.

<sup>18</sup>Pulsed-field gradient spin echo (PGSE) NMR

## References

- 1 M. J. Abraham, T. Murtola, R. Schulz, S. Páll, J. C. Smith, B. Hess and E. Lindahl, GROMACS: High performance molecular simulations through multi-level parallelism from laptops to supercomputers, *SoftwareX*, 2015, **1–2**, 19–25.
- 2 W. L. Jorgensen, D. S. Maxwell and J. Tirado-Rives, Development and Testing of the OPLS All-Atom Force Field on Conformational Energetics and Properties of Organic Liquids, *J. Am. Chem. Soc.*, 1996, **118**, 11225–11236.
- 3 J. N. Canongia Lopes and A. A. H. Pádua, Molecular Force Field for Ionic Liquids Composed of Triflate or Bistriflylimide Anions, *J. Phys. Chem. B*, 2004, **108**, 16893–16898.
- 4 J. N. Canongia Lopes and A. A. H. Pádua, Molecular Force Field for Ionic Liquids III: Imidazolium, Pyridinium, and Phosphonium Cations; Chloride, Bromide, and Dicyanamide Anions, *J. Phys. Chem. B*, 2006, **110**, 19586–19592.
- 5 A. Thum, A. Heuer, K. Shimizu and J. N. C. Lopes, Solvate ionic liquids based on lithium bis(trifluoromethanesulfonyl)imide–glyme systems: coordination in MD simulations with scaled charges, *Phys. Chem. Chem. Phys.*, 2020, **22**, 525–535.
- 6 J. N. Canongia Lopes and A. A. H. Pádua, CL&P: A generic and systematic force field for ionic liquids modeling, *Theor Chem Acc*, 2012, **131**, 1129.
- 7 S. Nosé, A unified formulation of the constant temperature molecular dynamics methods, *J. Chem. Phys.*, 1984, **81**, 511–519.
- 8 W. G. Hoover and B. L. Holian, Kinetic moments method for the canonical ensemble distribution, *Phys. Lett. A*, 1996, **211**, 253–257.
- 9 H. J. C. Berendsen, J. P. M. Postma, W. F. van Gunsteren, A. DiNola and J. R. Haak, Molecular dynamics with coupling to an external bath, *J. Chem. Phys.*, 1984, **81**, 3684–3690.
- 10 B. Hess, H. Bekker, H. J. C. Berendsen and J. G. E. M. Fraaije, LINCS: A linear constraint solver for molecular simulations, *J. Comput. Chem.*, 1997, **18**, 1463–1472.
- 11 T. Darden, D. York and L. Pedersen, Particle mesh Ewald: An N·log(N) method for Ewald sums in large systems, *J. Chem. Phys.*, 1993, **98**, 10089–10092.
- 12 U. Essmann, L. Perera, M. L. Berkowitz, T. Darden, H. Lee and L. G. Pedersen, A smooth particle mesh Ewald method, *J. Chem. Phys.*, 1995, **103**, 8577–8593.
- 13 L. Martínez, R. Andrade, E. G. Birgin and J. M. Martínez, PACKMOL: A package for building initial configurations for molecular dynamics simulations, *J. Comput. Chem.*, 2009, **30**, 2157–2164.
- 14 K. Yoshida, M. Tsuchiya, N. Tachikawa, K. Dokko and M. Watanabe, Change from Glyme Solutions to Quasi-ionic Liquids for Binary Mixtures Consisting of Lithium Bis(trifluoromethanesulfonyl)amide and Glymes, *J. Phys. Chem. C*, 2011, **115**, 18384–18394.
- 15 W. Humphrey, A. Dalke and K. Schulten, VMD: Visual molecular dynamics, *J. Mol. Graph.*, 1996, **14**, 33–38.
- 16 A. Thum, A. Heuer, K. Shimizu and J. N. C. Lopes, Solvate ionic liquids based on lithium bis (trifluoromethanesulfonyl) imide–glyme systems: Coordination in MD simulations with scaled charges, *Phys. Chem. Chem. Phys.*, 2020, **22**, 525–535.
- 17 D. Dong and D. Bedrov, Charge transport in [Li (tetraglyme)][bis (trifluoromethane) sulfonimide] solvate ionic liquids: insight from molecular dynamics simulations, *J. Phys. Chem. B*, 2018, **122**, 9994–10004.
- 18 C. Zhang, K. Ueno, A. Yamazaki, K. Yoshida, H. Moon, T. Mandai, Y. Umebayashi, K. Dokko and M. Watanabe, Chelate effects in glyme/lithium bis (trifluoromethanesulfonyl) amide solvate ionic liquids. I. Stability of solvate cations and correlation with electrolyte properties, *J. Phys. Chem. B*, 2014, **118**, 5144–5153.
- 19 K. Yoshida, M. Tsuchiya, N. Tachikawa, K. Dokko and M. Watanabe, Change from glyme solutions to quasi-ionic liquids for binary mixtures consisting of lithium bis (trifluoromethanesulfonyl) amide and glymes, *J. Phys. Chem. C*, 2011, **115**, 18384–18394.
